# Supplementary material
Source: PubMed Central journal article supplement (PMC10726469)
Supplement: ml3c00429_si_001.pdf [file ml3c00429_si_001.pdf]

## SUPPORTING INFORMATION

### Development of Allosteric NIK Ligands from Fragment-Based NMR Screening

Jared J. Anderson,<sup>†</sup> Michael J. Grillo,<sup>§</sup> Daniel A. Harki<sup>†,§,\*</sup>

<sup>†</sup>Department of Chemistry, University of Minnesota, 207 Pleasant St. SE, Minneapolis, MN 55455, United States.

<sup>§</sup>Department of Medicinal Chemistry, University of Minnesota, 2231 6<sup>th</sup> St SE, Minneapolis, MN 55455, United States.

\*Contact Information:

Daniel A. Harki, University of Minnesota, Department of Medicinal Chemistry, 2231 6<sup>th</sup> Street SE, Minneapolis, MN, 55455, United States

612-625-8687

[daharki@umn.edu](mailto:daharki@umn.edu)

Table of Contents for Supporting Information

|                                               |         |
|-----------------------------------------------|---------|
| I. Chemistry                                  | S2-S55  |
| A. General                                    | S2      |
| B. Procedures                                 | S2-S17  |
| C. <sup>1</sup> H and <sup>13</sup> C Spectra | S18-S55 |
| II. Supplementary Tables                      | S56-S59 |
| III. Assay Procedures                         | S60-S62 |
| IV. SPR Sensorgrams                           | S63-S69 |
| V. References                                 | S70     |

**Chemistry – General.** All air or moisture sensitive reactions were conducted in oven-dried glassware under inert argon atmosphere. Reactions were stirred with Teflon-coated stir bars. Solvents THF and CH<sub>2</sub>Cl<sub>2</sub> were dried using an MBraun solvent purification system. Other solvents were purchased as ACS grade and were used as received. All reagents were purchased from commercial suppliers and were used without further purification. Water for reverse phase purification and SPR assays was purified using a MilliQ system (MilliporeSigma). Silica gel chromatography was performed using RediSep<sup>®</sup> R<sub>f</sub> high performance silica gel columns (Teledyne-Isco) on a Combiflash NextGen 300+ instrument (Teledyne-Isco). C18 chromatography was performed using RediSep<sup>®</sup> high performance C18 columns (Teledyne-Isco) on a Combiflash NextGen 300+ instrument (Teledyne-Isco). <sup>1</sup>H and <sup>13</sup>C NMR spectra were collected on a Bruker Advance 500 MHz spectrometer at room temperature. Chemical shifts (δ) are reported in parts per million (ppm) and the residual solvent peak is used as a reference. Coupling constants (*J*) are reported in Hertz (Hz). High resolution mass spectrometry was performed on an Orbitrap HRMS LC-MS instrument at the Analytical Biochemistry Core Facility at the University of Minnesota Masonic Cancer Center. All assayed compounds were determined to be ≥ 95% purity at 215 nm and 254 nm by analytical reverse-phase HPLC analysis on an Agilent 1200-series instrument equipped with a diode array detector and a Luna C18 column (5 μm, 100 Å, 4.6 × 150 mm, Phenomenex). The analysis method (1.0 mL/min flow rate) involved isocratic H<sub>2</sub>O (90% H<sub>2</sub>O: 10% CH<sub>3</sub>CN; 0-2 min) followed by a linear gradient to 85% CH<sub>3</sub>CN (2-24 min) and finally a linear gradient to 95% CH<sub>3</sub>CN (24-26 min). Safety statement: No unexpected or abnormally high safety hazards were encountered.

### Chemistry – Procedures.

#### 3-chloro-1-(4-chloro-2-hydroxyphenyl)propan-1-one (3a)

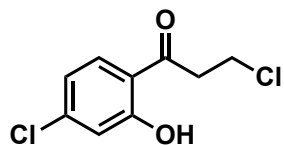

**3a** was prepared according to modification of prior report.<sup>1</sup> A mixture of *m*-chlorophenol (2.00 g, 15.6 mmol) and 3-chloropropionyl chloride (1.98 g, 15.6 mmol) were stirred at 110 °C for 45 minutes. The reaction mixture was cooled to room temperature and aluminum chloride (4.15g, 31.1 mmol) was added in portions. The reaction mixture was stirred at 90 °C for 2 hours. The reaction mixture was cooled to room temperature and quenched with crushed ice. The solution was partitioned between CH<sub>2</sub>Cl<sub>2</sub> (100 mL) and H<sub>2</sub>O (100 mL), the organic phase separated, washed with brine (75 mL), dried over anhydrous Na<sub>2</sub>SO<sub>4</sub> and the filtrate was evaporated under reduced pressure. The crude material was purified by silica gel flash column chromatography on a gradient of EtOAc:Hexanes (1:20) to (1:1) to give **3a** as a pale

yellow solid (1.63 g, 48%):  $^1\text{H NMR}$  (500 MHz,  $\text{CDCl}_3$ )  $\delta$  12.15 (s, 1H), 7.65 (d,  $J = 5.0$  Hz, 1H), 7.02 (d,  $J = 2.5$  Hz, 1 H), 6.91 (dd,  $J = 8.5, 2.0$  Hz, 2 H), 3.91 (t,  $J = 6.5$  Hz, 1 H), 3.46 (t,  $J = 6.7$  Hz, 2 H).

### 3-chloro-1-(2-hydroxy-6-methylphenyl)propan-1-one (3b)

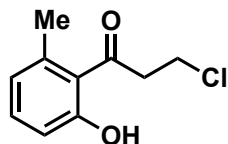

**3b** was prepared according to modification of prior report.<sup>1</sup> A mixture of m-cresol (1.00 g, 9.25 mmol) and 3-chloropropionyl chloride (1.17 g, 9.25 mmol) were stirred at 110 °C for 45 minutes. The reaction mixture was cooled to room temperature and aluminum chloride (3.70g, 27.7 mmol) was added in portions. The reaction mixture was stirred at 90 °C for 2 hours. The reaction mixture was cooled to room temperature and quenched with crushed ice. The solution was partitioned between  $\text{CH}_2\text{Cl}_2$  (100 mL) and  $\text{H}_2\text{O}$  (100 mL), the organic phase separated, washed with brine (75 mL), dried over anhydrous  $\text{Na}_2\text{SO}_4$  and the filtrate was evaporated under reduced pressure. The crude material was purified by silica gel flash column chromatography on a gradient of EtOAc:Hexanes (1:20) to (1:1) to give **3b** as a pale yellow solid (781 mg, 43%):  $^1\text{H NMR}$  (500 MHz,  $\text{CDCl}_3$ )  $\delta$  11.44 (s, 1H), 7.29 (t,  $J = 7.5$  Hz, 1 H), 6.84 (d,  $J = 8.3$  Hz, 1 H), 6.74 (d,  $J = 7.5$  Hz, 1 H), 3.92 (t,  $J = 6.7$  Hz, 2 H), 3.44 (t,  $J = 6.7$  Hz, 2 H), 2.59 (s, 3 H).  $^{13}\text{C NMR}$  (500 MHz,  $\text{CDCl}_3$ )  $\delta$  204.6, 162.0, 138.8, 134.7, 123.4, 121.9, 116.5, 47.0, 38.8, 24.2. HRMS (ESI<sup>-</sup>)  $m/z$  calcd for  $\text{C}_{10}\text{H}_{11}\text{O}_2\text{Cl}$  (M-H<sup>+</sup>): 197.0375, found: 197.0373.

### 3-chloro-1-(2-hydroxy-5-methylphenyl)propan-1-one (3c)

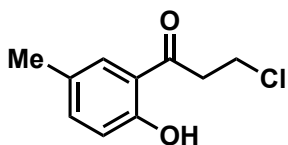

**3c** was prepared according to modification of prior report.<sup>1</sup> A mixture of p-cresol (2.00 g, 18.5 mmol) and 3-chloropropionyl chloride (2.35 g, 18.5 mmol) were stirred at 80 °C for 45 minutes. The reaction mixture was cooled to room temperature and aluminum chloride (4.93 g, 37.0 mmol) was added in portions. The reaction mixture was stirred at 120 °C for 24 hours. The reaction mixture was cooled to room temperature and quenched with crushed ice. The solution was partitioned between  $\text{CH}_2\text{Cl}_2$  (100 mL) and  $\text{H}_2\text{O}$  (100 mL), the organic phase separated, washed with brine (75 mL), dried over anhydrous  $\text{Na}_2\text{SO}_4$  and the filtrate was evaporated under reduced pressure. The crude material was purified by silica gel flash column chromatography on a gradient of EtOAc:Hexanes (1:20) to (1:1) to give **3c** as a pale yellow solid (2.63 g, 72%):  $^1\text{H NMR}$  (500 MHz,  $\text{CDCl}_3$ )  $\delta$  11.85 (s, 1H), 7.50 (s, 1H), 7.31 (dd,  $J = 8.6, 2.3$  Hz, 1H), 6.91 (d,  $J = 8.6$  Hz, 1H), 3.92 (t,  $J = 6.7$  Hz, 2H), 3.49 (t,  $J = 6.7$  Hz, 2H), 2.32 (s, 3H).

### 3-chloro-1-(2-hydroxy-4-methylphenyl)propan-1-one (3d)

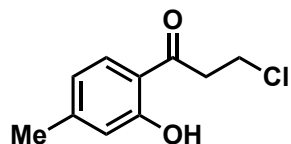

**3d** was prepared according to modification of prior report.<sup>1</sup> A mixture of m-cresol (1.00 g, 9.25 mmol) and 3-chloropropionyl chloride (1.17 g, 9.25 mmol) were stirred at 110 °C for 45 minutes. The reaction mixture was cooled to room temperature and aluminum chloride (3.70 g, 27.7 mmol) was added in portions. The reaction mixture was stirred at 90 °C for 2 hours. The reaction mixture was cooled to room temperature and quenched with crushed ice. The solution was partitioned between CH<sub>2</sub>Cl<sub>2</sub> (100 mL) and H<sub>2</sub>O (100 mL), the organic phase separated, washed with brine (75 mL), dried over anhydrous Na<sub>2</sub>SO<sub>4</sub> and the filtrate was evaporated under reduced pressure. The crude material was purified by silica gel flash column chromatography on a gradient of EtOAc:Hexanes (1:20) to (1:1) to give **3d** as a pale yellow solid (342 mg, 19%): <sup>1</sup>H NMR (500 MHz, CDCl<sub>3</sub>) δ 12.05 (s, 1H), 7.60 (d, *J* = 8.2 Hz, 1H), 6.80 (s, 1H), 6.73 (d, *J* = 8.1 Hz, 1H), 3.91 (t, *J* = 6.9 Hz, 2H), 3.45 (t, *J* = 6.7 Hz, 2H), 2.36 (s, 3H). <sup>13</sup>C NMR (500 MHz, CDCl<sub>3</sub>) δ 201.9, 162.8, 148.7, 129.7, 120.6, 118.8, 117.1, 40.8, 38.4, 22.1. HRMS (ESI) *m/z* calcd for C<sub>10</sub>H<sub>11</sub>O<sub>2</sub>Cl (M-H<sup>+</sup>): 197.0375, found: 197.0374.

### 3-chloro-1-(2-hydroxy-3-methylphenyl)propan-1-one (3e)

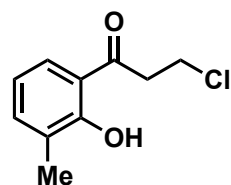

**3e** was prepared according to modification of prior report.<sup>1</sup> A mixture of o-cresol (2.00 g, 18.5 mmol) and 3-chloropropionyl chloride (2.35 g, 18.5 mmol) were stirred at 80 °C for 45 minutes. The reaction mixture was cooled to room temperature and aluminum chloride (4.93 g, 37.0 mmol) was added in portions. The reaction mixture was stirred at 120 °C for 24 hours. The reaction mixture was cooled to room temperature and quenched with crushed ice. The solution was partitioned between CH<sub>2</sub>Cl<sub>2</sub> (100 mL) and H<sub>2</sub>O (100 mL), the organic phase separated, washed with brine (75 mL), dried over anhydrous Na<sub>2</sub>SO<sub>4</sub> and the filtrate was evaporated under reduced pressure. The crude material was purified by silica gel flash column chromatography on a gradient of EtOAc:Hexanes (1:20) to (1:1) to give **3e** as a pale yellow solid (912 mg, 25%): <sup>1</sup>H NMR (500 MHz, CDCl<sub>3</sub>) δ 12.33 (s, 1H), 7.58 (d, *J* = 8.3 Hz, 1H), 7.37 (d, *J* = 7.2 Hz, 1H), 6.83 (t, *J* = 7.6 Hz, 1H), 3.92 (t, *J* = 6.8 Hz, 2H), 3.50 (t, *J* = 6.7 Hz, 2H), 2.27 (s, 3H).

### 3-chloro-1-(4-chloro-2-hydroxy-6-methylphenyl)propan-1-one (3f)

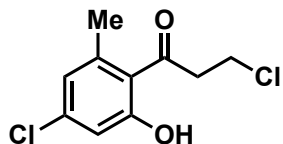

**3f** was prepared according to modification of prior report.<sup>1</sup> A mixture of 5-chloro-3-cresol (1.51 g, 10.6 mmol) and 3-chloropropionyl chloride (1.34 g, 10.6 mmol) were stirred at 110 °C for 45 minutes. The reaction mixture was cooled to room temperature and aluminum chloride (4.24 g, 31.8 mmol) was added in portions. The reaction mixture was stirred at 90 °C for 2 hours. The reaction mixture was cooled to room temperature and quenched with crushed ice. The solution was partitioned between CH<sub>2</sub>Cl<sub>2</sub> (100 mL) and H<sub>2</sub>O (100 mL), the organic phase separated, washed with brine (75 mL), dried over anhydrous Na<sub>2</sub>SO<sub>4</sub> and the filtrate was evaporated under reduced pressure. The crude material was purified by silica gel flash column chromatography on a gradient of EtOAc:Hexanes (1:20) to (1:1) to give **3f** as a pale yellow solid (834 mg, 34%): <sup>1</sup>H NMR (500 MHz, CDCl<sub>3</sub>) δ 11.92 (s, 1H), 6.88 (s, 1H), 6.74 (s, 1H), 3.91 (t, *J* = 6.9 Hz, 2H), 3.42 (t, *J* = 6.7 Hz, 2H), 2.58 (s, 3H). <sup>13</sup>C NMR (500 MHz, CDCl<sub>3</sub>) δ 204.0, 163.4, 140.7, 140.6, 123.8, 120.2, 116.8, 47.1, 38.7, 24.5. HRMS (ESI<sup>+</sup>) *m/z* calcd for C<sub>10</sub>H<sub>10</sub>O<sub>2</sub>Cl<sub>2</sub> (M-H<sup>+</sup>): 230.9985, found: 230.9982.

### 1-(4-chloro-2-hydroxy-6-methylphenyl)ethan-1-one (3g)

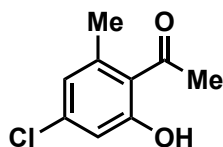

**3g** was prepared according to modification of prior report.<sup>1</sup> A mixture of 3-chloro-5-methylphenol (1.82 g, 12.8 mmol) and acetyl chloride (1.00 g, 12.8 mmol) were stirred at 110 °C for 45 minutes. The reaction mixture was cooled to room temperature and aluminum chloride (5.11 g, 38.3 mmol) was added in portions. The reaction mixture was stirred at 90 °C for 2 hours. The reaction mixture was cooled to room temperature and quenched with crushed ice. The solution was partitioned between CH<sub>2</sub>Cl<sub>2</sub> (100 mL) and H<sub>2</sub>O (100 mL), the organic phase separated, washed with brine (75 mL), dried over anhydrous Na<sub>2</sub>SO<sub>4</sub> and the filtrate was evaporated under reduced pressure. The crude material was purified by silica gel flash column chromatography on a gradient of EtOAc:Hexanes (1:20) to (1:1) to give **3g** as a pale yellow solid (984 mg, 42%): <sup>1</sup>H NMR (500 MHz, CDCl<sub>3</sub>) δ 12.64 (s, 1H), 6.86 (s, 1H), 6.72 (s, 1H), 2.66 (s, 3H), 2.58 (s, 3H). <sup>13</sup>C NMR (500 MHz, CDCl<sub>3</sub>) δ 205.5, 164.1, 141.3, 140.6, 123.5, 120.1, 116.8, 33.5, 24.6. HRMS (ESI<sup>+</sup>) *m/z* calcd for C<sub>9</sub>H<sub>9</sub>O<sub>2</sub>Cl (M-H<sup>+</sup>): 183.0218, found: 183.0212.

### 7-chlorochroman-4-one (4a)

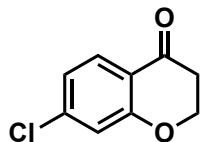

**4a** was prepared according to modification of prior report.<sup>2</sup> A mixture of **3a** (1.35 g, 6.16 mmol) and  $K_2CO_3$  (1.70 g, 12.3 mmol) in anhydrous EtOH (40 mL) was stirred at room temperature under argon for 24 hours. The suspension was filtered and the filtrate was evaporated under reduced pressure. The crude material was purified by silica gel flash column on a gradient of EtOAc:Hexanes (1:20) to (1:1) to give **4a** as a white solid (688 mg, 61%):  $^1H$  NMR (500 MHz,  $CDCl_3$ )  $\delta$  7.83 (d,  $J$  = 9.0 Hz, 1H), 7.01-6.98 (m, 2H), 4.55 (t,  $J$  = 6.3 Hz, 2H), 2.81 (t,  $J$  = 6.7 Hz, 2H).

### 5-methylchroman-4-one (4b)

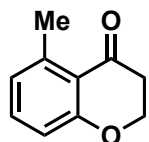

**4b** was prepared according to modification of prior report.<sup>2</sup> A mixture of **3b** (198 mg, 997  $\mu$ mol) and  $K_2CO_3$  (276 mg, 1.99 mmol) in anhydrous EtOH (10 mL) was stirred at room temperature under argon for 24 hours. The suspension was filtered and the filtrate was evaporated under reduced pressure. The crude material was purified by silica gel flash column on a gradient of EtOAc:Hexanes (1:20) to (1:1) to give **4b** as a white solid (45.8 mg, 28%):  $^1H$  NMR (500 MHz,  $CDCl_3$ )  $\delta$  7.30 (t,  $J$  = 7.5 Hz, 1H), 6.83 (d,  $J$  = 8.4 Hz, 1H), 6.79 (d,  $J$  = 7.5 Hz, 1H), 4.48 (t,  $J$  = 6.3 Hz, 2H), 2.80 (t,  $J$  = 6.4 Hz, 2H), 2.64 (s, 3H).

### 6-methylchroman-4-one (4c)

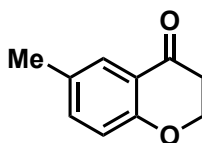

**4c** was prepared according to modification of prior report.<sup>2</sup> A mixture of **3c** (1.12 g, 5.64 mmol) and  $K_2CO_3$  (1.56 g, 11.3 mmol) in anhydrous EtOH (50 mL) was stirred at room temperature under argon for 24 hours. The suspension was filtered and the filtrate was evaporated under reduced pressure. The crude material was purified by silica gel flash column on a gradient of EtOAc:Hexanes (1:20) to (1:1) to give **4c** as a white solid (672 mg, 73%):  $^1H$  NMR (500 MHz,  $CDCl_3$ )  $\delta$  7.69 (s, 1H), 7.28 (dd,  $J$  = 8.5, 2.4 Hz, 1H), 6.87 (d,  $J$  = 8.6 Hz, 1H), 4.51 (t,  $J$  = 6.1 Hz, 2H), 2.79 (t,  $J$  = 6.6 Hz, 2H), 2.31 (s, 3H).

### 7-methylchroman-4-one (4d)

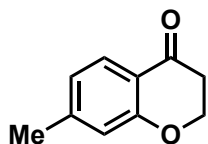

**4d** was prepared according to modification of prior report.<sup>2</sup> A mixture of **3d** (780 mg, 3.93 mmol) and  $K_2CO_3$  (1.09 g, 7.85 mmol) in anhydrous EtOH (25 mL) was stirred at room temperature under argon for 24 hours. The suspension was filtered and the filtrate was evaporated under reduced pressure. The crude material was purified by silica gel flash column on a gradient of EtOAc:Hexanes (1:20) to (1:1) to give **4d** as a white solid (368 mg, 58%):  $^1H$  NMR (500 MHz,  $CDCl_3$ )  $\delta$  7.78 (d,  $J = 7.9$  Hz, 1H), 6.83 (d,  $J = 8.1$  Hz, 1H), 6.77 (s, 1H), 4.51 (t,  $J = 6.3$  Hz, 2H), 2.78 (t,  $J = 6.6$  Hz, 2H), 2.35 (s, 3H).

### 8-methylchroman-4-one (4e)

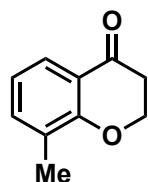

**4e** was prepared according to modification of prior report.<sup>2</sup> A mixture of **3e** (785 mg, 3.95 mmol) and  $K_2CO_3$  (1.09 g, 7.90 mmol) in anhydrous EtOH (25 mL) was stirred at room temperature under argon for 24 hours. The suspension was filtered and the filtrate was evaporated under reduced pressure. The crude material was purified by silica gel flash column on a gradient of EtOAc:Hexanes (1:20) to (1:1) to give **4e** as a white solid (328 mg, 51%):  $^1H$  NMR (500 MHz,  $CDCl_3$ )  $\delta$  7.75 (d,  $J = 7.8$  Hz, 1H), 7.33 (d,  $J = 7.3$  Hz, 1H), 6.91 (t,  $J = 7.7$  Hz, 1H), 4.56 (t,  $J = 6.1$  Hz, 2H), 2.80 (t,  $J = 6.7$  Hz, 2H), 2.24 (s, 3H).

### 7-chloro-5-methylchroman-4-one (4f)

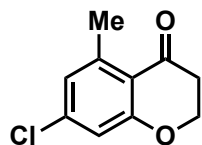

**4f** was prepared according to modification of prior report.<sup>2</sup> A mixture of **3f** (558 mg, 2.39 mmol) and  $K_2CO_3$  (662 mg, 4.79 mmol) in anhydrous EtOH (16 mL) was stirred at room temperature under argon for 24 hours. The suspension was filtered and the filtrate was evaporated under reduced pressure. The crude material was purified by silica gel flash column on a gradient of EtOAc:Hexanes (1:20) to (1:1) to give **4f** as a white solid (263 mg, 56%):  $^1H$  NMR (500 MHz,  $CDCl_3$ )  $\delta$  6.86 (s, 1H), 6.80 (s, 1H), 4.48 (t,  $J = 6.3$  Hz, 2H), 2.78 (t,  $J = 6.6$  Hz, 2H), 2.62 (s, 3H).  $^{13}C$  NMR (500 MHz,  $CDCl_3$ )  $\delta$  192.5, 163.4, 144.1, 140.2,

125.0, 118.6, 116.1, 66.9, 39.1, 23.0. HRMS (ESI<sup>-</sup>) *m/z* calcd for C<sub>10</sub>H<sub>9</sub>O<sub>2</sub>Cl (M-H<sup>+</sup>): 195.0218, found: 195.0219.

#### 7-chloro-4-methylchroman-4-ol (**5**)

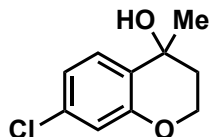

To a solution of **4a** (100 mg, 548 μmol) in anhydrous THF (2.74 mL, 0.20 M) was added MeMgBr (979 μL of 1.4 M solution in (1:3) THF:Toluene) at 0 °C under argon gas. The reaction was allowed to warm to room temperature as it stirred for 24 hours. The reaction was cooled to 0 °C and quenched with sat. aq. NH<sub>4</sub>Cl solution (5 mL). The mixture was partitioned between CH<sub>2</sub>Cl<sub>2</sub> (25 mL) and H<sub>2</sub>O (25 mL), the organic phase separated, washed with brine (25 mL), dried over anhydrous Na<sub>2</sub>SO<sub>4</sub> and the filtrate was evaporated under reduced pressure. The crude material was purified by silica gel flash column chromatography on a gradient of EtOAc:Hexanes (1:20) to (1:1) to give **5** as a white solid (86.7 mg, 79%): <sup>1</sup>H NMR (500 MHz, DMSO-*d*<sub>6</sub>) δ 7.46 (d, *J* = 8.4 Hz, 1H), 6.92 (dd, *J* = 8.2, 2.1 Hz, 1H), 6.79 (d, *J* = 2.2 Hz, 1H), 5.20 (s, 1H), 4.26-4.15 (m, 2H), 1.98-1.87 (m, 2H), 1.45 (s, 3H). <sup>13</sup>C NMR (500 MHz, DMSO-*d*<sub>6</sub>) δ 154.3, 131.9, 129.3, 128.8, 120.1, 115.8, 64.4, 63.6, 37.2, 29.7. HRMS (ESI<sup>-</sup>) *m/z* calcd for C<sub>10</sub>H<sub>11</sub>O<sub>2</sub>Cl (M-H<sup>+</sup>): 197.0375, found: 197.0375.

#### 7-chloro-4-ethylchroman-4-ol (**6**)

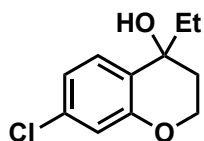

To a solution of **4a** (100 mg, 548 μmol) in anhydrous THF (2.74 mL, 0.20 M) was added EtMgBr (1.37 mL of 1.0 M solution in THF) at 0 °C under argon gas. The reaction was allowed to warm to room temperature as it stirred for 24 hours. The reaction was cooled to 0 °C and quenched with sat. aq. NH<sub>4</sub>Cl solution (5 mL). The mixture was partitioned between CH<sub>2</sub>Cl<sub>2</sub> (25 mL) and H<sub>2</sub>O (25 mL), the organic phase separated, washed with brine (25 mL), dried over anhydrous Na<sub>2</sub>SO<sub>4</sub> and the filtrate was evaporated under reduced pressure. The crude material was purified by silica gel flash column chromatography on a gradient of EtOAc:Hexanes (1:20) to (1:1) to give **6** as a white solid (49.3 mg, 42%): <sup>1</sup>H NMR (500 MHz, CDCl<sub>3</sub>) δ 7.33 (d, *J* = 8.4 Hz, 1H), 6.90 (dd, *J* = 8.4, 2.2 Hz, 1H), 6.84 (d, *J* = 2.1 Hz, 1H), 4.26-4.24 (m, 2H), 2.15-1.86 (m, 4H), 1.74 (s, 1H), 0.90 (t, *J* = 7.5 Hz, 3H). <sup>13</sup>C NMR (500 MHz, CDCl<sub>3</sub>) δ 155.3, 134.2, 127.6, 126.1, 121.0, 117.3, 68.5, 63.4, 34.0, 33.9, 8.38. HRMS (ESI<sup>-</sup>) *m/z* calcd for C<sub>11</sub>H<sub>13</sub>O<sub>2</sub>Cl (M-H<sup>+</sup>): 211.0531, found: 211.0528.



### 7-chloro-4-cyclopropylchroman-4-ol (7)

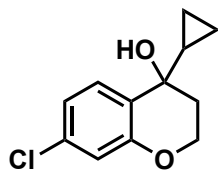

To a solution of **4a** (105 mg, 575  $\mu\text{mol}$ ) in anhydrous THF (2.88 mL, 0.20 M) was added *cycloPrMgBr* (1.15 mL of 1.0 M solution in 2-methyl THF) at 0 °C under argon gas. The reaction was transferred to an oil bath and was refluxed under argon gas for 24 hours. The reaction was cooled to 0 °C and quenched with sat. aq.  $\text{NH}_4\text{Cl}$  solution (5 mL). The mixture was partitioned between  $\text{CH}_2\text{Cl}_2$  (25 mL) and  $\text{H}_2\text{O}$  (25 mL), the organic phase separated, washed with brine (25 mL), dried over anhydrous  $\text{Na}_2\text{SO}_4$  and the filtrate was evaporated under reduced pressure. The crude material was purified by reverse phase C18 chromatography on a gradient of  $\text{MeCN}:\text{H}_2\text{O}$  (1:9) to (9:1) to give **7** as a white solid (78.0 mg, 60%):  $^1\text{H}$  NMR (500 MHz,  $\text{DMSO}-d_6$ )  $\delta$  7.53 (d,  $J = 8.4$  Hz, 1H), 6.92 (dd,  $J = 8.4, 2.3$  Hz, 1H), 6.81 (d,  $J = 2.3$  Hz, 1H), 4.90 (s, 1H), 4.32-4.24 (m, 2H), 1.97-1.86 (m, 2H), 1.05-1.00 (tt,  $J = 8.3, 5.4$  Hz, 1H), 0.70-0.65 (dtd,  $J = 8.9, 5.7, 4.0$  Hz, 1H), 0.52-0.46 (tdd,  $J = 8.7, 5.8, 3.9$  Hz, 1H), 0.37-0.32 (dtd,  $J = 8.8, 5.8, 4.0$  Hz, 1H), 0.29-0.23 (tdd,  $J = 8.7, 5.8, 4.0$  Hz, 1H).  $^{13}\text{C}$  NMR (500 MHz,  $\text{DMSO}-d_6$ )  $\delta$  154.5, 132.2, 129.3, 128.4, 119.7, 115.7, 64.1, 63.3, 36.0, 20.9, -1.42, -0.97. HRMS (ESI $^-$ )  $m/z$  calcd for  $\text{C}_{12}\text{H}_{13}\text{O}_2\text{Cl}$  ( $\text{M}-\text{H}^+$ ): 223.0531, found: 223.0531.

### 7-chloro-4-phenylchroman-4-ol (8)

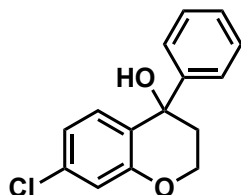

To a solution of **4a** (100 mg, 548  $\mu\text{mol}$ ) in anhydrous THF (2.74 mL, 0.20 M) was added  $\text{PhMgBr}$  (602  $\mu\text{L}$  of 1.0 M solution in THF) at 0 °C under argon gas. The reaction was allowed to warm to room temperature as it stirred for 24 hours. The reaction was cooled to 0 °C and quenched with sat. aq.  $\text{NH}_4\text{Cl}$  solution (5 mL). The mixture was partitioned between  $\text{CH}_2\text{Cl}_2$  (25 mL) and  $\text{H}_2\text{O}$  (25 mL), the organic phase separated, washed with brine (25 mL), dried over anhydrous  $\text{Na}_2\text{SO}_4$  and the filtrate was evaporated under reduced pressure. The crude material was purified by reverse phase C18 chromatography on a gradient of  $\text{MeCN}:\text{H}_2\text{O}$  (1:9) to (9:1) to give **8** as a white solid (36.2 mg, 25%):  $^1\text{H}$  NMR (500 MHz,  $\text{DMSO}-d_6$ )  $\delta$  7.34-7.22 (m, 5H), 6.92 (s, 1H), 6.87 (s, 2H), 6.00 (s, 1H), 4.36-4.31 (ddd,  $J = 11.1, 9.8, 2.8$  Hz, 1H), 4.14-4.10 (ddd,  $J = 11.1, 5.7, 3.5$  Hz, 1H), 2.25-2.19 (ddd,  $J = 14.0, 9.8, 3.7$  Hz, 1H), 2.10-2.05 (ddd,  $J = 14.1,$

5.6, 2.9 Hz, 1H).  $^{13}\text{C}$  NMR (500 MHz,  $\text{DMSO-}d_6$ )  $\delta$  155.2, 147.7, 132.4, 131.2, 128.1, 127.8, 126.7, 126.3, 120.1, 116.0, 69.5, 63.1, 38.8. HRMS (ESI $^-$ )  $m/z$  calcd for  $\text{C}_{15}\text{H}_{13}\text{O}_2\text{Cl}$  ( $\text{M-H}^+$ ): 259.0531, found: 259.0529.

### 7-chloro-4-methoxychromane (9)

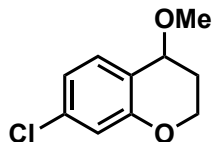

**1** (223 mg, 1.21 mmol) was dissolved in anhydrous THF (5 mL) and was slowly added to a suspension of NaH (72.5 mg, 1.81 mmol, 60% dispersion in mineral oil) in anhydrous THF (5 mL) at room temperature under argon gas. The reaction was stirred for 30 minutes. Methyl iodide (171 mg, 1.21 mmol) was slowly added at room temperature under argon gas and the reaction was stirred for 3 hours. The reaction was quenched with crushed ice, the mixture was partitioned between EtOAc (25 mL) and sat. aq.  $\text{NaHCO}_3$  solution (25 mL), the organic phase separated, washed with brine (25 mL), dried over anhydrous  $\text{Na}_2\text{SO}_4$  and the filtrate was evaporated under reduced pressure. The crude material was purified by silica gel flash column chromatography on a gradient of EtOAc:Hexanes (1:20) to (1:1) to give **9** as a clear liquid (164 mg, 68%):  $^1\text{H}$  NMR (500 MHz,  $\text{DMSO-}d_6$ )  $\delta$  7.16 (d,  $J$  = 8.1 Hz, 1H), 6.88-6.85 (m, 2H), 4.29-4.21 (m, 3H), 3.42 (s, 3H), 2.16-1.98 (m, 2H).  $^{13}\text{C}$  NMR (500 MHz,  $\text{DMSO-}d_6$ )  $\delta$  155.6, 134.9, 131.6, 120.4, 120.3, 117.3, 71.4, 62.4, 56.0, 27.1. HRMS (ESI $^-$ )  $m/z$  calcd for  $\text{C}_{10}\text{H}_{11}\text{O}_2\text{Cl}$  ( $\text{M-H}^+$ ): 197.0375, found: 197.0374.

### 5-methylchroman-4-ol (10)

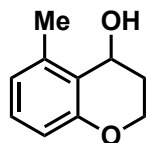

**10** was prepared according to modification of prior report.<sup>3</sup> To a solution of **4b** (36.3 mg, 224  $\mu\text{mol}$ ) in anhydrous MeOH (678  $\mu\text{L}$ , 0.33 M) was added  $\text{NaBH}_4$  (9.31 mg, 246  $\mu\text{mol}$ ) at 0  $^\circ\text{C}$ . The reaction was stirred at 0  $^\circ\text{C}$  for 2 hours. The reaction was quenched by addition of  $\text{H}_2\text{O}$  (5 mL), the mixture was transferred to a separatory funnel and extracted with  $\text{CH}_2\text{Cl}_2$  (10 mL x 3), then the combined organic phases were washed with 25 mL of brine. The organic phase was separated, dried over anhydrous  $\text{Na}_2\text{SO}_4$  and the filtrate was evaporated under reduced pressure. The crude material was purified by reverse phase C18 chromatography on a gradient of MeCN: $\text{H}_2\text{O}$  (1:9) to (9:1) to give **10** as a white solid (22.8 mg, 62%):  $^1\text{H}$  NMR (500 MHz,  $\text{DMSO-}d_6$ )  $\delta$  7.03(t,  $J$  = 8.1 Hz, 1H), 6.70 (d,  $J$  = 7.4 Hz, 1H), 6.59 (d,  $J$  = 8.2 Hz, 1H), 5.08 (d,  $J$  = 5.4 Hz, 1H), 4.64 (m, 1H), 4.19-4.07 (m, 2H), 2.33 (s, 3H), 1.92-1.83 (m, 2H). MS (ESI $^-$ )  $m/z$  calcd for  $\text{C}_{10}\text{H}_{12}\text{O}_2$  ( $\text{M-H}^+$ ): 163.1, found: 163.1.

### 6-methylchroman-4-ol (**11**)

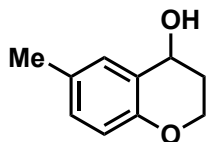

**11** was prepared according to prior report.<sup>3</sup> To a solution of **4c** (624 mg, 3.85 mmol) in anhydrous MeOH (11.7 mL, 0.33 M) was added NaBH<sub>4</sub> (160 mg, 4.23 mmol) at 0 °C. The reaction was stirred at 0 °C for 2 hours. The reaction was quenched by addition of H<sub>2</sub>O (10 mL), the mixture was transferred to a separatory funnel and extracted with CH<sub>2</sub>Cl<sub>2</sub> (10 mL x 3), then the combined organic phases were washed with 25 mL of brine. The organic phase was separated, dried over anhydrous Na<sub>2</sub>SO<sub>4</sub> and the filtrate was evaporated under reduced pressure. The crude material was purified by reverse phase C18 chromatography on a gradient of MeCN:H<sub>2</sub>O (1:9) to (9:1) to give **11** as a white solid (418 mg, 66%): <sup>1</sup>H NMR (500 MHz, DMSO-*d*<sub>6</sub>) δ 7.09 (s, 1H), 6.92 (dd, *J* = 8.2, 2.4 Hz, 1H), 6.62 (d, *J* = 8.3 Hz, 1H), 5.27 (d, *J* = 5.4 Hz, 1H), 4.56 (q, *J* = 5.0 Hz, 1H), 4.16-4.09 (m, 2H), 2.20 (s, 3H), 1.99-1.80 (m, 2H). MS (ESI<sup>-</sup>) *m/z* calcd for C<sub>10</sub>H<sub>12</sub>O<sub>2</sub> (M-H<sup>+</sup>): 163.1, found: 163.1.

### 7-methylchroman-4-ol (**12**)

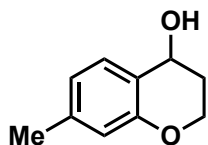

**12** was prepared according to modification of prior report.<sup>3</sup> To a solution of **4d** (345 mg, 2.13 mmol) in anhydrous MeOH (6.45 mL, 0.33 M) was added NaBH<sub>4</sub> (88.5 mg, 2.34 mmol) at 0 °C. The reaction was stirred at 0 °C for 2 hours. The reaction was quenched by addition of H<sub>2</sub>O (10 mL), the mixture was transferred to a separatory funnel and extracted with CH<sub>2</sub>Cl<sub>2</sub> (10 mL x 3), then the combined organic phases were washed with 25 mL of brine. The organic phase was separated, dried over anhydrous Na<sub>2</sub>SO<sub>4</sub> and the filtrate was evaporated under reduced pressure. The crude material was purified by reverse phase C18 chromatography on a gradient of MeCN:H<sub>2</sub>O (1:9) to (9:1) to give **12** as a white solid (212 mg, 61%): <sup>1</sup>H NMR (500 MHz, DMSO-*d*<sub>6</sub>) δ 7.15 (d, *J* = 7.8 Hz, 1H), 6.67 (d, *J* = 7.8 Hz, 1H), 6.55 (s, 1H), 5.23 (d, *J* = 5.4 Hz, 1H), 4.56 (q, *J* = 4.9 Hz, 1H), 4.17-4.11 (m, 2H), 2.21 (s, 3H), 1.98-1.80 (m, 2H). MS (ESI<sup>-</sup>) *m/z* calcd for C<sub>10</sub>H<sub>12</sub>O<sub>2</sub> (M-H<sup>+</sup>): 163.1, found: 163.1.

### 8-methylchroman-4-ol (**13**)

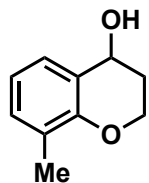

**13** was prepared according to modification of prior report.<sup>3</sup> To a solution of **4e** (332 mg, 2.05 mmol) in anhydrous MeOH (6.20 mL, 0.33 M) was added NaBH<sub>4</sub> (85.2 mg, 2.25 mmol) at 0 °C. The reaction was stirred at 0 °C for 2 hours. The reaction was quenched by addition of H<sub>2</sub>O (10 mL), the mixture was transferred to a separatory funnel and extracted with CH<sub>2</sub>Cl<sub>2</sub> (10 mL x 3), then the combined organic phases were washed with 25 mL of brine. The organic phase was separated, dried over anhydrous Na<sub>2</sub>SO<sub>4</sub> and the filtrate was evaporated under reduced pressure. The crude material was purified by reverse phase C18 chromatography on a gradient of MeCN:H<sub>2</sub>O (1:9) to (9:1) to give **13** as a white solid (185 mg, 55%): <sup>1</sup>H NMR (500 MHz, DMSO-*d*<sub>6</sub>) δ 7.12 (d, *J* = 7.7 Hz, 1H), 7.00 (d, *J* = 7.3 Hz, 1H), 6.75 (t, *J* = 7.5 Hz, 1H), 5.27 (d, *J* = 4.8 Hz, 1H), 4.59 (q, *J* = 4.6 Hz, 1H), 4.25-4.17 (m, 2H), 2.09 (s, 3H), 2.00-1.83 (m, 2H). MS (ESI<sup>-</sup>) *m/z* calcd for C<sub>10</sub>H<sub>12</sub>O<sub>2</sub> (M-H<sup>+</sup>): 163.1, found: 163.1.

### 7-chlorochroman-4-ol (**1**)

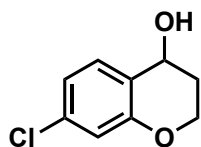

**1** was prepared according to prior report.<sup>3</sup> To a solution of **4a** (535 mg, 2.93 mmol) in anhydrous MeOH (8.88 mL, 0.33 M) was added NaBH<sub>4</sub> (122 mg, 3.22 mmol) at 0 °C. The reaction was stirred at 0 °C for 2 hours. The reaction was quenched by addition of H<sub>2</sub>O (10 mL), the mixture was transferred to a separatory funnel and extracted with CH<sub>2</sub>Cl<sub>2</sub> (10 mL x 3), then the combined organic phases were washed with 25 mL of brine. The organic phase was separated, dried over anhydrous Na<sub>2</sub>SO<sub>4</sub> and the filtrate was evaporated under reduced pressure. The crude material was purified by silica gel flash column chromatography on a gradient of EtOAc:Hexanes (1:20) to (1:1) to give **1** as a white solid (408 mg, 75%): <sup>1</sup>H NMR (500 MHz, CDCl<sub>3</sub>) δ 7.23 (d, *J* = 8.3 Hz, 1H), 6.90 (dd, *J* = 8.1, 2.2 Hz, 1H), 6.86 (d, *J* = 2.2 Hz, 1H), 4.77 (q, *J* = 4.6 Hz, 1H), 4.30-4.25 (m, 2H), 2.15-2.00 (m, 2H), 1.78 (d, *J* = 5.1 Hz, 1H). MS (ESI<sup>-</sup>) *m/z* calcd for C<sub>10</sub>H<sub>12</sub>O<sub>2</sub> (M-H<sup>+</sup>): 183.0, found: 183.0.

### 7-chloro-5-methylchroman-4-ol (**14**)

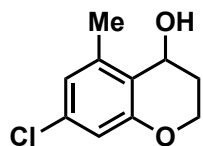

To a solution of **4f** (44.8 mg, 228  $\mu\text{mol}$ ) in anhydrous MeOH (691  $\mu\text{L}$ , 0.33 M) was added  $\text{NaBH}_4$  (9.48 mg, 251  $\mu\text{mol}$ ) at 0  $^\circ\text{C}$ . The reaction was stirred at 0  $^\circ\text{C}$  for 2 hours. The reaction was quenched by addition of  $\text{H}_2\text{O}$  (5 mL), the mixture was transferred to a separatory funnel and extracted with  $\text{CH}_2\text{Cl}_2$  (10 mL x 3), then the combined organic phases were washed with 25 mL of brine. The organic phase was separated, dried over anhydrous  $\text{Na}_2\text{SO}_4$  and the filtrate was evaporated under reduced pressure. The crude material was purified by reverse phase C18 chromatography on a gradient of MeCN: $\text{H}_2\text{O}$  (1:9) to (9:1) to give **14** as a white solid (34.5 mg, 76%):  $^1\text{H}$  NMR (500 MHz,  $\text{DMSO}-d_6$ )  $\delta$  6.79 (d,  $J = 2.9$  Hz, 1H), 6.68 (d,  $J = 2.5$  Hz, 1H), 5.18 (s, 1H), 4.63 (s, 1H), 4.23-4.08 (m, 2H), 2.33 (s, 3H), 1.92-1.82 (m, 2H).  $^{13}\text{C}$  NMR (500 MHz,  $\text{DMSO}-d_6$ )  $\delta$  155.2, 141.1, 132.1, 122.2, 121.4, 113.8, 60.8, 57.8, 31.0, 17.8. HRMS (ESI $^-$ )  $m/z$  calcd for  $\text{C}_{10}\text{H}_{11}\text{O}_2\text{Cl}$  ( $\text{M}-\text{H}^+$ ): 197.0375, found: 197.0372.

### 7-chloro-4,5-dimethylchroman-4-ol (**15**)

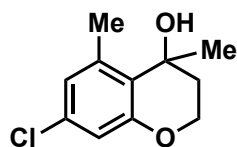

To a solution of **4f** (102 mg, 519  $\mu\text{mol}$ ) in anhydrous THF (2.59 mL, 0.20 M) was added  $\text{MeMgBr}$  (929  $\mu\text{L}$  of 1.4 M solution in (1:3) THF:Toluene) at 0  $^\circ\text{C}$  under argon gas. The reaction was allowed to warm to room temperature as it stirred for 24 hours. The reaction was cooled to 0  $^\circ\text{C}$  and quenched with sat. aq.  $\text{NH}_4\text{Cl}$  solution (5 mL). The mixture was partitioned between  $\text{CH}_2\text{Cl}_2$  (25 mL) and  $\text{H}_2\text{O}$  (25 mL), the organic phase separated, washed with brine (25 mL), dried over anhydrous  $\text{Na}_2\text{SO}_4$  and the filtrate was evaporated under reduced pressure. The crude material was purified by silica gel flash column chromatography on a gradient of EtOAc:Hexanes (1:20) to (1:1) to give **15** as a white solid (78.4 mg, 71%):  $^1\text{H}$  NMR (500 MHz,  $\text{CDCl}_3$ )  $\delta$  6.71 (s, 1H), 6.67 (s, 1H), 4.20-4.10 (m, 2H), 2.57 (s, 3H), 2.17-2.05 (m, 2H), 1.69 (s, 1H), 1.66 (s, 3H).  $^{13}\text{C}$  NMR (500 MHz,  $\text{CDCl}_3$ )  $\delta$  155.5, 140.3, 133.4, 125.4, 124.7, 115.3, 68.6, 63.9, 41.5, 28.5, 21.7. HRMS (ESI $^-$ )  $m/z$  calcd for  $\text{C}_{11}\text{H}_{13}\text{O}_2\text{Cl}$  ( $\text{M}-\text{H}^+$ ): 211.0531, found: 211.0532.

### 7-chloro-4-ethyl-5-methylchroman-4-ol (16)

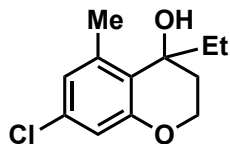

To a solution of **4f** (105 mg, 534  $\mu\text{mol}$ ) in anhydrous THF (2.67 mL, 0.20 M) was added EtMgBr (1.33 mL of 1.0 M solution in THF) at 0 °C under argon gas. The reaction was allowed to warm to room temperature as it stirred for 24 hours. The reaction was cooled to 0 °C and quenched with sat. aq.  $\text{NH}_4\text{Cl}$  solution (5 mL). The mixture was partitioned between  $\text{CH}_2\text{Cl}_2$  (25 mL) and  $\text{H}_2\text{O}$  (25 mL), the organic phase separated, washed with brine (25 mL), dried over anhydrous  $\text{Na}_2\text{SO}_4$  and the filtrate was evaporated under reduced pressure. The crude material was purified by silica gel flash column chromatography on a gradient of EtOAc:Hexanes (1:20) to (1:1) to give **16** as a white solid (58.9 mg, 49%):  $^1\text{H}$  NMR (500 MHz,  $\text{CDCl}_3$ )  $\delta$  6.72 (s, 1H), 6.69 (s, 1H), 4.17-4.05 (m, 2H), 2.54 (s, 3H), 2.29-2.24 (m, 1H), 2.06-1.89 (m, 3H), 1.71 (s, 1H), 0.86 (t,  $J = 7.6$  Hz, 3H).  $^{13}\text{C}$  NMR (500 MHz,  $\text{CDCl}_3$ )  $\delta$  156.2, 140.4, 133.4, 124.9, 124.7, 115.4, 70.8, 63.3, 37.1, 32.2, 21.8, 8.20. HRMS (ESI<sup>-</sup>)  $m/z$  calcd for  $\text{C}_{12}\text{H}_{15}\text{O}_2\text{Cl}$  (M-H<sup>+</sup>): 225.0688, found: 225.0685.

### 7-chloro-4-cyclopropyl-5-methylchroman-4-ol (17)

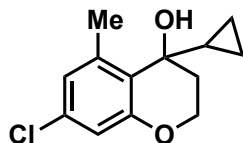

To a solution of **4f** (87.2 mg, 443  $\mu\text{mol}$ ) in anhydrous THF (2.22 mL, 0.20 M) was added *cycloPrMgBr* (887  $\mu\text{L}$  of 1.0 M solution in 2-methyl THF) at 0 °C under argon gas. The reaction was transferred to an oil bath and was refluxed under argon gas for 24 hours. The reaction was cooled to 0 °C and quenched with sat. aq.  $\text{NH}_4\text{Cl}$  solution (5 mL). The mixture was partitioned between  $\text{CH}_2\text{Cl}_2$  (25 mL) and  $\text{H}_2\text{O}$  (25 mL), the organic phase separated, washed with brine (25 mL), dried over anhydrous  $\text{Na}_2\text{SO}_4$  and the filtrate was evaporated under reduced pressure. The crude material was purified by reverse phase C18 chromatography on a gradient of MeCN: $\text{H}_2\text{O}$  (1:9) to (9:1) to give **17** as a white solid (72.3 mg, 68%):  $^1\text{H}$  NMR (500 MHz,  $\text{DMSO-}d_6$ )  $\delta$  6.71 (d,  $J = 2.5$  Hz, 1H), 6.65 (d,  $J = 2.4$  Hz, 1H), 4.93 (s, 1H), 4.25-4.14 (m, 2H), 2.53 (s, 3H), 2.02-1.93 (m, 2H), 1.15-1.10 (tt,  $J = 8.4, 5.5$  Hz, 1H), 0.81-0.76 (dtd,  $J = 9.5, 5.7, 4.0$  Hz, 1H), 0.59-0.53 (tdd,  $J = 8.8, 6.1, 4.0$  Hz, 1H), 0.36-0.31 (tdd,  $J = 8.9, 5.8, 4.0$  Hz, 1H), 0.27-0.22 (dtd,  $J = 9.2, 6.0, 4.0$  Hz, 1H).  $^{13}\text{C}$  NMR (500 MHz,  $\text{DMSO-}d_6$ )  $\delta$  154.3, 140.2, 130.1, 126.0, 122.0, 112.9, 65.6, 62.0, 37.6, 21.1, 19.8, 3.54, -0.50. HRMS (ESI<sup>-</sup>)  $m/z$  calcd for  $\text{C}_{13}\text{H}_{15}\text{O}_2\text{Cl}$  (M-H<sup>+</sup>): 237.0688, found: 237.0684.

### 7-chloro-5-methyl-4-phenylchroman-4-ol (**18**)

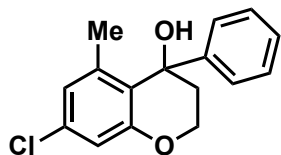

To a solution of **4f** (88.3 mg, 449  $\mu\text{mol}$ ) in anhydrous THF (2.25 mL, 0.20 M) was added PhMgBr (898  $\mu\text{L}$  of 1.0 M solution in THF) at 0 °C under argon gas. The reaction was allowed to warm to room temperature as it stirred for 24 hours. The reaction was cooled to 0 °C and quenched with sat. aq.  $\text{NH}_4\text{Cl}$  solution (5 mL). The mixture was partitioned between  $\text{CH}_2\text{Cl}_2$  (25 mL) and  $\text{H}_2\text{O}$  (25 mL), the organic phase separated, washed with brine (25 mL), dried over anhydrous  $\text{Na}_2\text{SO}_4$  and the filtrate was evaporated under reduced pressure. The crude material was purified by reverse phase C18 chromatography on a gradient of MeCN: $\text{H}_2\text{O}$  (1:9) to (9:1) to give **18** as a white solid (83.1 mg, 67%):  $^1\text{H}$  NMR (500 MHz,  $\text{DMSO-}d_6$ )  $\delta$  7.31-7.20 (m, 5H), 6.80 (d,  $J = 2.5$  Hz, 1H), 6.72 (d,  $J = 2.5$  Hz, 1H), 5.93 (s, 1H), 4.20-4.15 (ddd,  $J = 11.2, 9.3, 2.6$  Hz, 1H), 4.06-4.02 (ddd,  $J = 10.9, 6.2, 3.4$  Hz, 1H), 2.20-2.15 (ddd,  $J = 14.2, 6.1, 2.6$  Hz, 1H), 2.06-2.00 (ddd,  $J = 14.0, 9.5, 3.4$  Hz, 1H), 1.78 (s, 3H).  $^{13}\text{C}$  NMR (500 MHz,  $\text{DMSO-}d_6$ )  $\delta$  156.8, 149.0, 142.2, 132.5, 128.4, 126.8, 126.3, 125.7, 123.8, 114.7, 70.6, 62.9, 43.5, 21.3. HRMS (ESI<sup>-</sup>)  $m/z$  calcd for  $\text{C}_{16}\text{H}_{15}\text{O}_2\text{Cl}$  (M-H<sup>+</sup>): 273.0688, found: 273.0685.

### 1-(4-chloro-2-methoxy-6-methylphenyl)ethan-1-one (**19**)

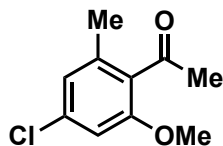

**3g** (496 mg, 2.69 mmol) was dissolved in anhydrous DMF (2 mL) and was added to a suspension of  $\text{K}_2\text{CO}_3$  (408 mg, 2.96 mmol) in anhydrous DMF (3 mL) at room temperature under argon gas. The reaction was stirred for 30 minutes. Methyl iodide (419 mg, 2.96 mmol) was slowly added at room temperature under argon gas and the reaction was stirred overnight. The reaction was quenched with crushed ice, the mixture was partitioned between EtOAc (100 mL) and sat. aq.  $\text{NaHCO}_3$  solution (75 mL), the organic phase separated, washed with brine (25 mL), dried over anhydrous  $\text{Na}_2\text{SO}_4$  and the filtrate was evaporated under reduced pressure. The crude material was purified by silica gel flash column chromatography on a gradient of EtOAc/Hexanes (1:20) to (1:1) to give **19** as a white solid (465 mg, 87%):  $^1\text{H}$  NMR (500 MHz,  $\text{DMSO-}d_6$ )  $\delta$  7.03 (s, 1H), 6.94 (s, 1H), 3.81 (s, 3H), 2.40 (s, 3H), 2.13 (s, 3H).  $^{13}\text{C}$  NMR (500 MHz,  $\text{DMSO-}d_6$ )  $\delta$  203.6, 156.7, 136.5, 134.1, 129.6, 122.3, 109.6, 56.3, 31.9, 18.3. HRMS (ESI<sup>+</sup>)  $m/z$  calcd for  $\text{C}_{10}\text{H}_{11}\text{O}_2\text{Cl}$  (M+H<sup>+</sup>): 199.0521, found: 199.0497.

## 2-(4-chloro-2-methoxy-6-methylphenyl)propan-2-ol (**20**)

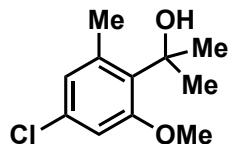

To a solution of **19** (121 mg, 609  $\mu\text{mol}$ ) in anhydrous THF (3.05 mL, 0.20 M) was added MeMgBr (1.09 mL of 1.4 M solution in (1:3) THF:Toluene) at 0 °C under argon gas. The reaction was allowed to warm to room temperature as it stirred for 24 hours. The reaction was cooled to 0 °C and quenched with sat. aq.  $\text{NH}_4\text{Cl}$  solution (5 mL). The mixture was partitioned between  $\text{CH}_2\text{Cl}_2$  (25 mL) and  $\text{H}_2\text{O}$  (25 mL), the organic phase separated, washed with brine (25 mL), dried over anhydrous  $\text{Na}_2\text{SO}_4$  and the filtrate was evaporated under reduced pressure. The crude material was purified by silica gel flash column chromatography on a gradient of EtOAc:Hexanes (1:20) to (1:1) to give **20** as a white solid (98.3 mg, 75%):  $^1\text{H}$  NMR (500 MHz,  $\text{DMSO}-d_6$ )  $\delta$  6.87 (d,  $J = 2.4$  Hz, 1H), 6.74 (d,  $J = 2.5$  Hz, 1H), 4.73 (s, 1H), 3.75 (s, 3H), 2.53 (s, 3H), 1.52 (s, 6H).  $^{13}\text{C}$  NMR (500 MHz,  $\text{DMSO}-d_6$ )  $\delta$  157.7, 139.3, 134.5, 130.4, 124.6, 110.3, 73.5, 55.9, 30.8, 24.1. HRMS (ESI<sup>+</sup>)  $m/z$  calcd for  $\text{C}_{11}\text{H}_{15}\text{O}_2\text{Cl}$  ( $\text{M}+\text{H}^+$ ): 215.0834, found: 215.0470.

## 1-(4-chloro-2-methoxy-6-methylphenyl)-1-cyclopropylethan-1-ol (**21**)

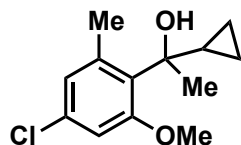

To a solution of **19** (119 mg, 599  $\mu\text{mol}$ ) in anhydrous THF (3.00 mL, 0.20 M) was added *cycloPrMgBr* (1.20 mL of 1.0 M solution in 2-methyl THF) at 0 °C under argon gas. The reaction was transferred to an oil bath and was refluxed under argon gas for 24 hours. The reaction was cooled to 0 °C and quenched with sat. aq.  $\text{NH}_4\text{Cl}$  solution (5 mL). The mixture was partitioned between  $\text{CH}_2\text{Cl}_2$  (25 mL) and  $\text{H}_2\text{O}$  (25 mL), the organic phase separated, washed with brine (25 mL), dried over anhydrous  $\text{Na}_2\text{SO}_4$  and the filtrate was evaporated under reduced pressure. The crude material was purified by silica gel flash column chromatography on a gradient of EtOAc:Hexanes (1:20) to (1:1) to give **21** as a white solid (87.3 mg, 61%):  $^1\text{H}$  NMR (500 MHz,  $\text{CDCl}_3$ )  $\delta$  6.79 (s, 2H), 4.47 (s, 1H), 3.85 (s, 3H), 2.52 (s, 3H), 1.59 (s, 3H), 1.44-1.39 (tt,  $J = 8.3, 5.7$  Hz, 1H), 0.60-0.39 (m, 4H).  $^{13}\text{C}$  NMR (500 MHz,  $\text{CDCl}_3$ )  $\delta$  158.3, 138.3, 133.0, 131.9, 125.8, 110.7, 75.6, 56.1, 28.8, 24.6, 22.2, 2.47, 2.06. HRMS (ESI<sup>+</sup>)  $m/z$  calcd for  $\text{C}_{13}\text{H}_{17}\text{O}_2\text{Cl}$  ( $\text{M}+\text{H}^+$ ): 241.0990, found: 241.0959.



### 1-(4-chloro-2-methoxy-6-methylphenyl)-1-phenylethan-1-ol (**22**)

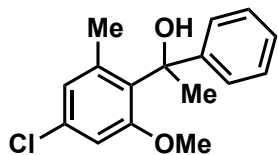

To a solution of **19** (122 mg, 614  $\mu\text{mol}$ ) in anhydrous THF (3.07 mL, 0.20 M) was added PhMgBr (1.23 mL of 1.0 M solution in THF) at 0 °C under argon gas. The reaction was allowed to warm to room temperature as it stirred for 24 hours. The reaction was cooled to 0 °C and quenched with sat. aq.  $\text{NH}_4\text{Cl}$  solution (5 mL). The mixture was partitioned between  $\text{CH}_2\text{Cl}_2$  (25 mL) and  $\text{H}_2\text{O}$  (25 mL), the organic phase separated, washed with brine (25 mL), dried over anhydrous  $\text{Na}_2\text{SO}_4$  and the filtrate was evaporated under reduced pressure. The crude material was purified by silica gel flash column chromatography on a gradient of EtOAc:Hexanes (1:20) to (1:1) to give **22** as a white solid (112 mg, 66%):  $^1\text{H}$  NMR (500 MHz,  $\text{CDCl}_3$ )  $\delta$  7.32-7.27 (m, 4H), 7.22-7.18 (m, 1H), 6.81 (d,  $J = 2.3$  Hz, 1H), 6.77 (d,  $J = 2.4$  Hz, 1H), 4.77 (s, 1H), 3.57 (s, 3H), 2.26 (s, 3H), 1.95 (s, 3H).  $^{13}\text{C}$  NMR (500 MHz,  $\text{CDCl}_3$ )  $\delta$  158.6, 150.0, 138.9, 133.2, 132.7, 128.0, 126.6, 125.8, 124.9, 111.5, 78.3, 56.3, 31.4, 24.0. HRMS (ESI)  $m/z$  calcd for  $\text{C}_{16}\text{H}_{17}\text{O}_2\text{Cl}$  ( $\text{M}-\text{H}^+$ ): 277.0990, found: 277.0949.

# Chemistry – $^1\text{H}$ and $^{13}\text{C}$ NMR Spectra

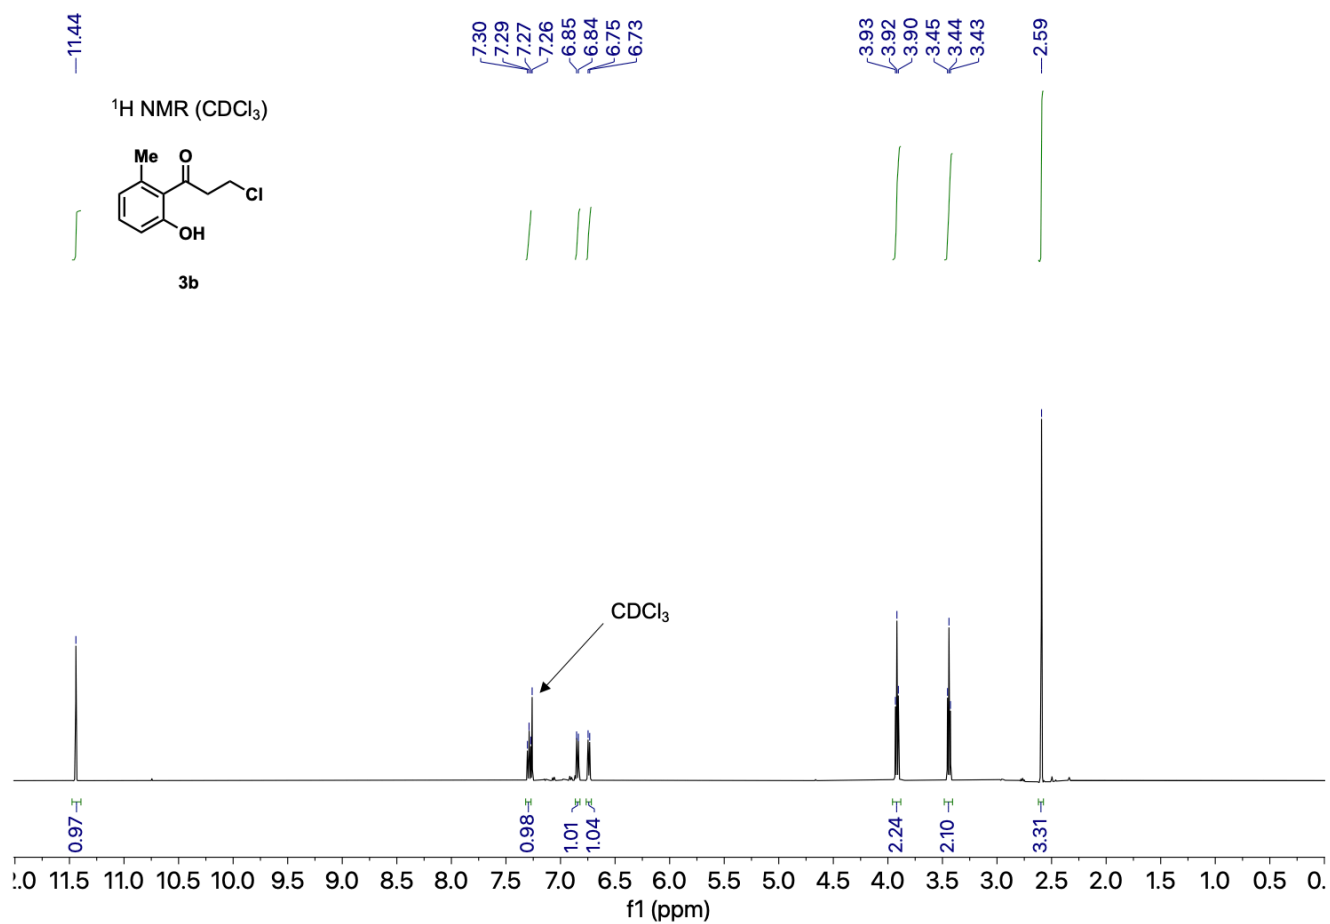

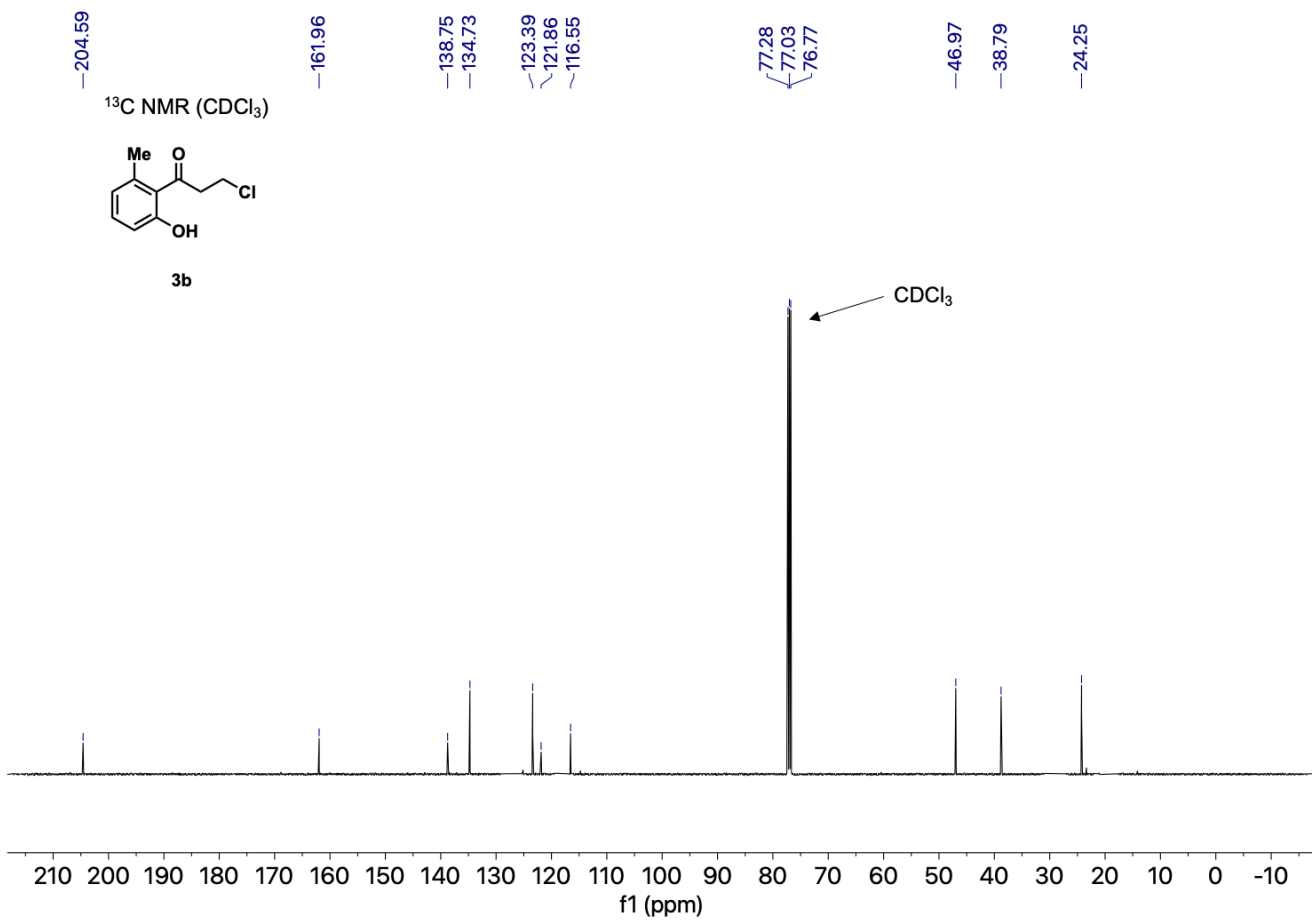

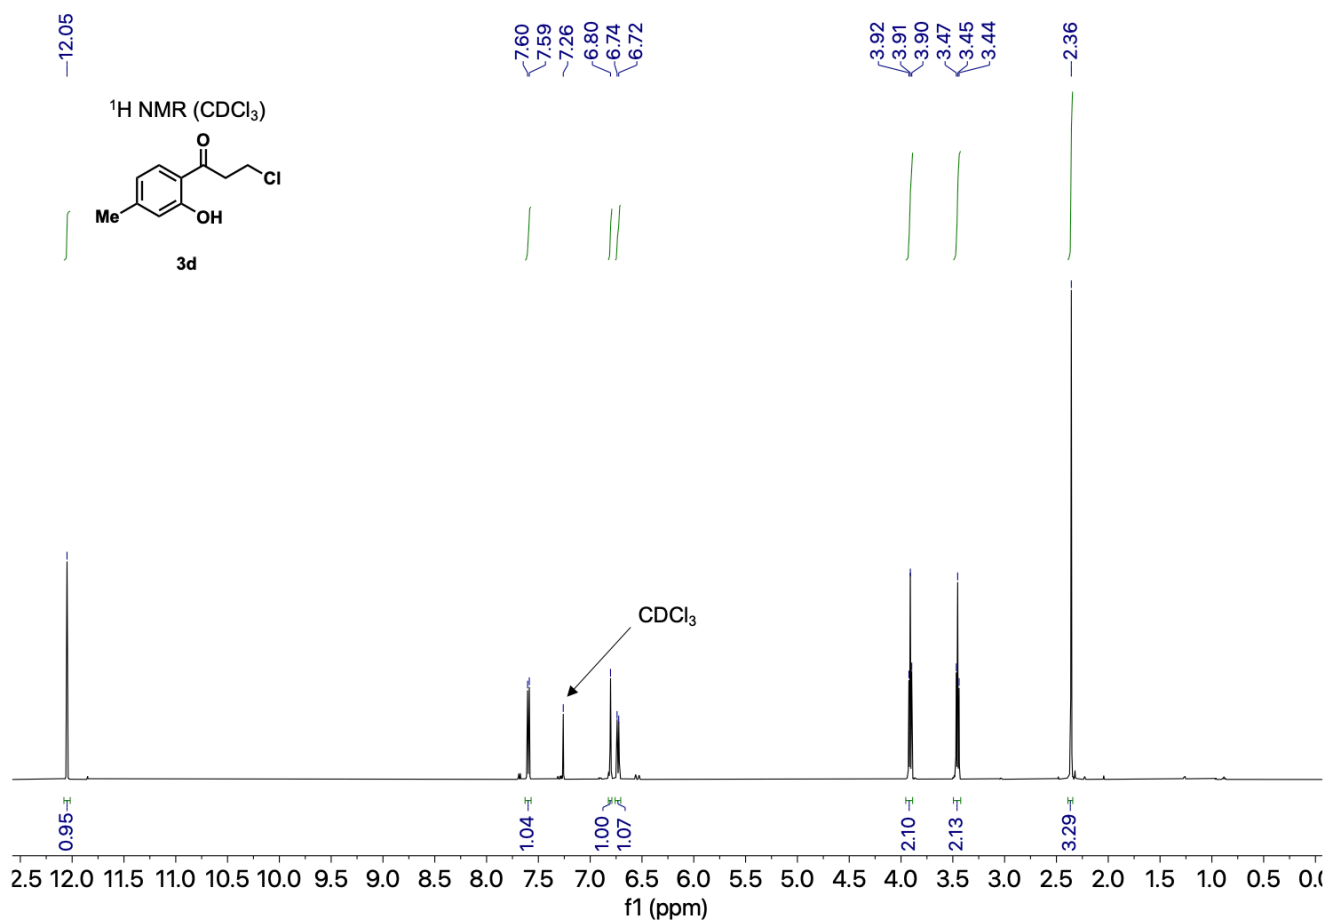

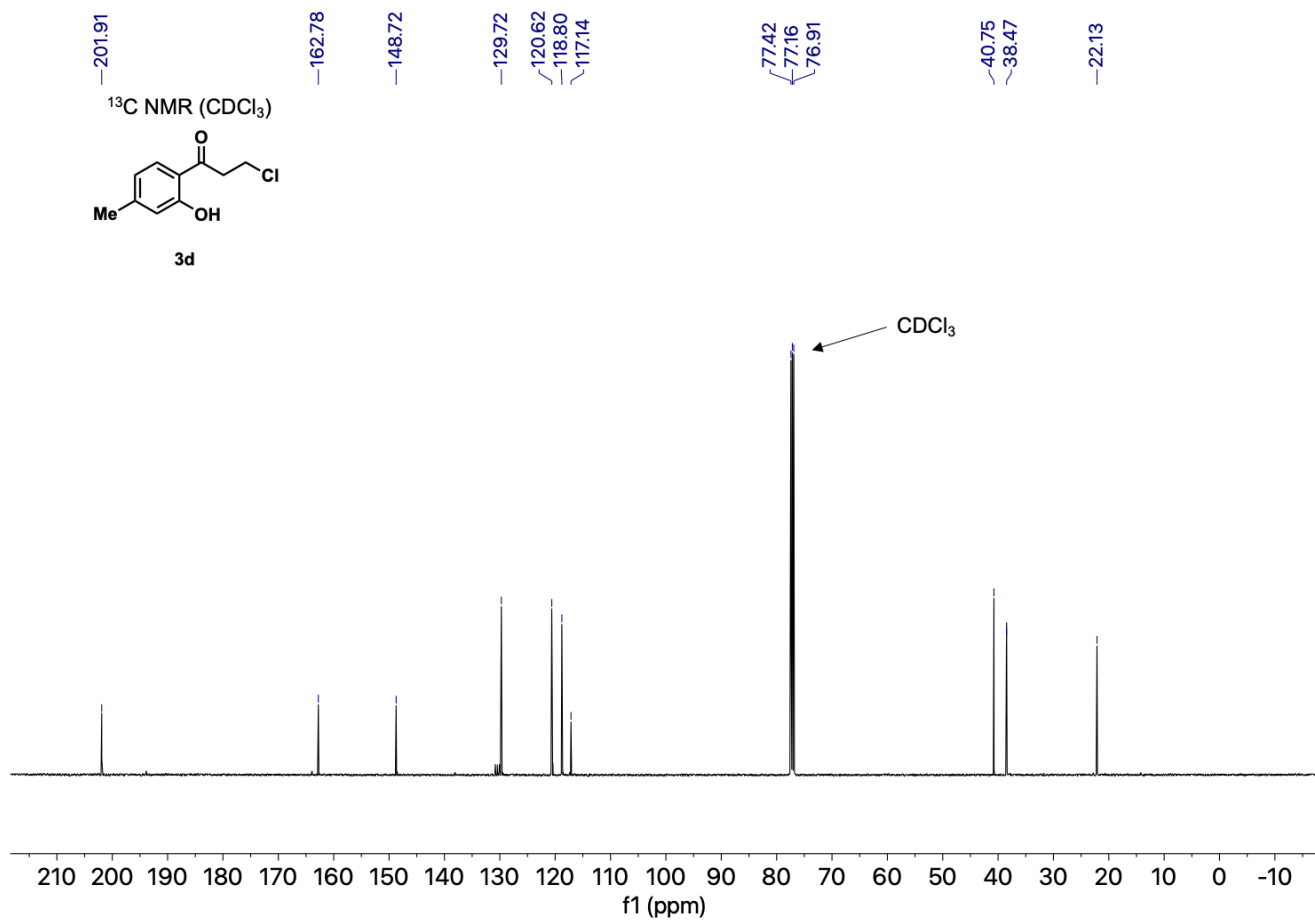

-11.92

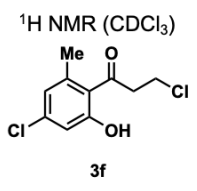

~7.26  
6.88  
6.74

3.92  
3.91  
3.89

3.43  
3.42  
3.40

-2.58

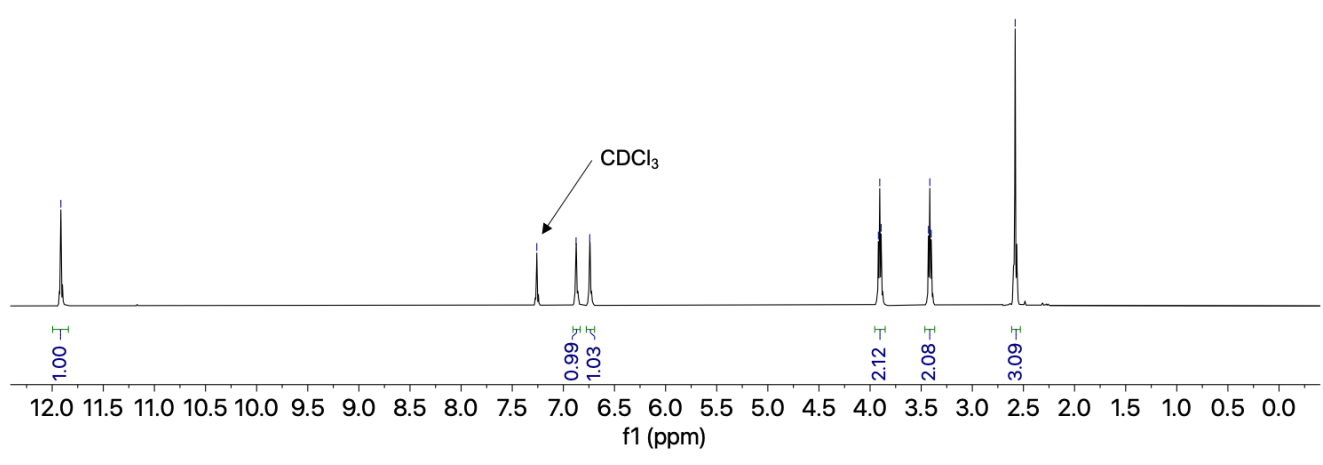

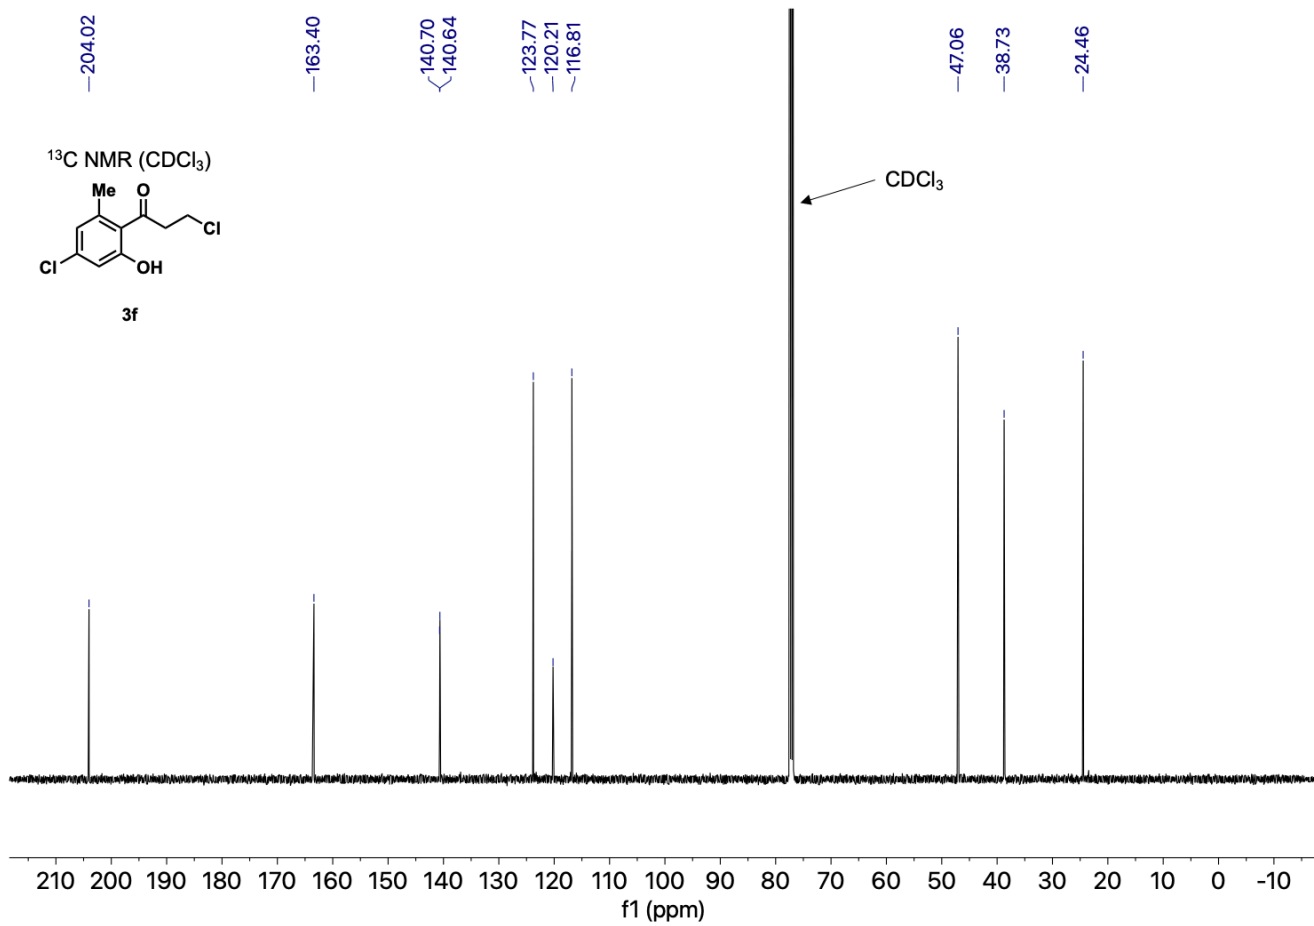

-12.64

<sup>1</sup>H NMR (CDCl<sub>3</sub>)

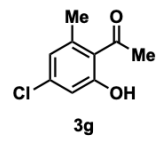

7.26  
6.86  
6.72

2.66  
2.58

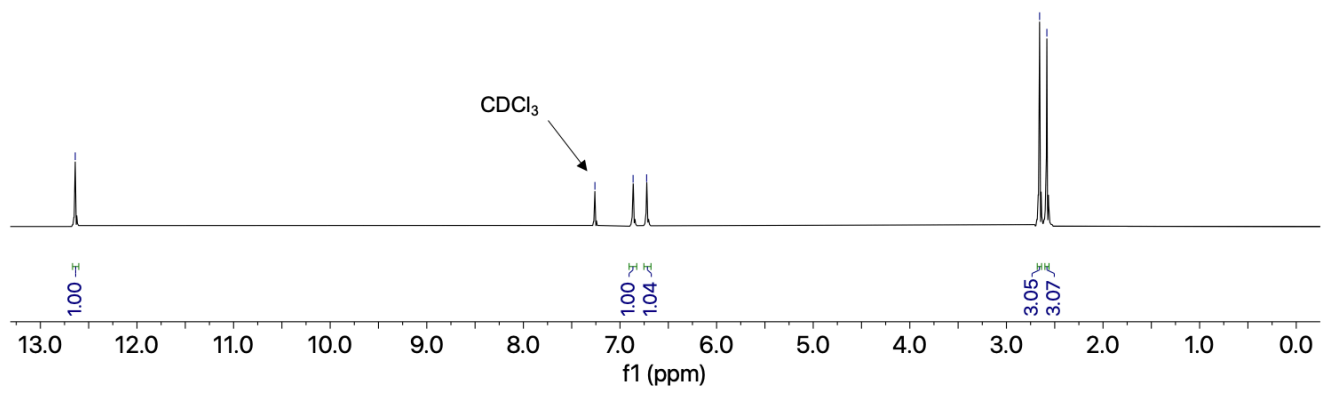



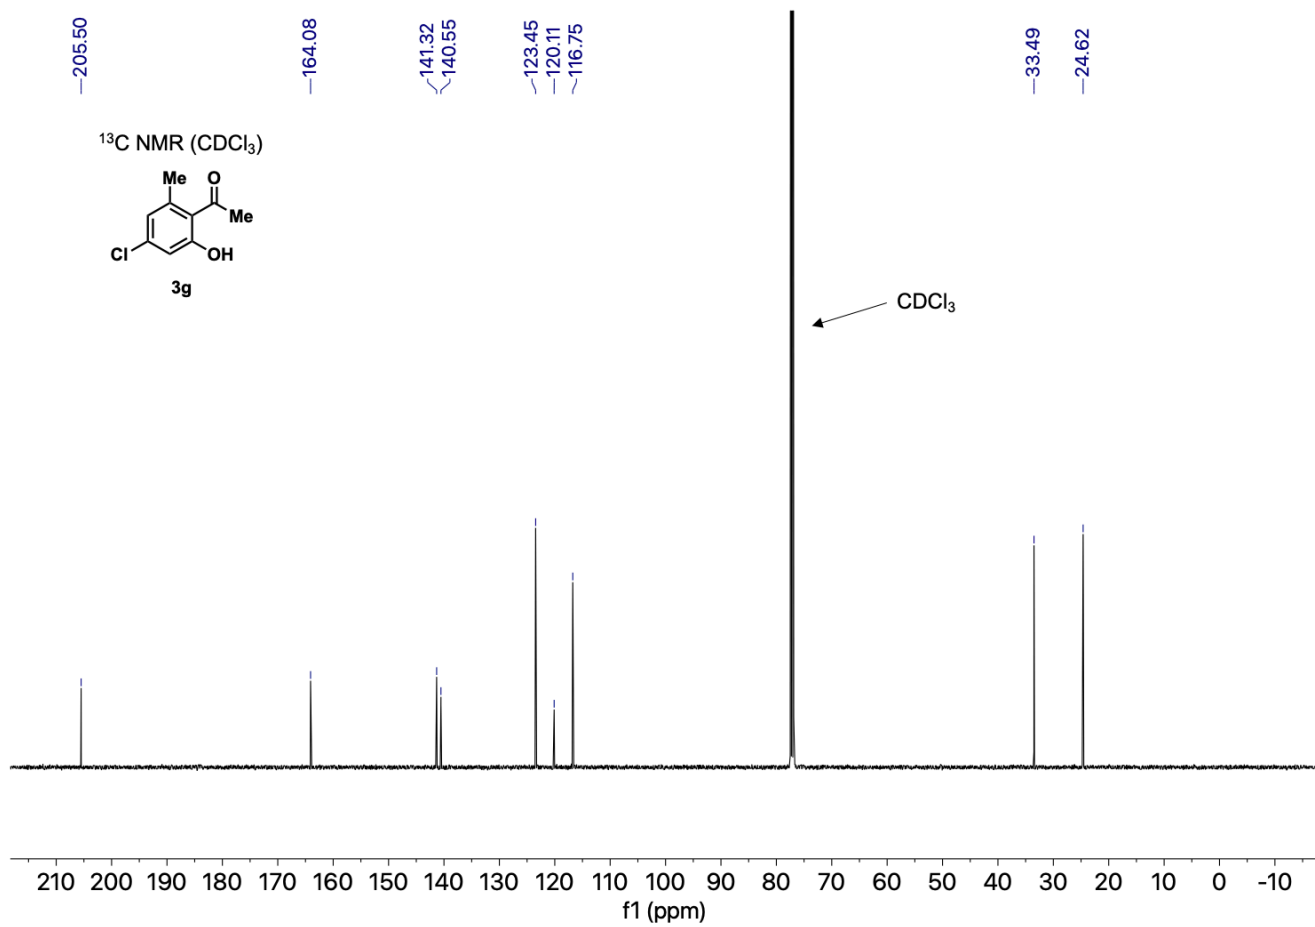

7.26  
6.86  
6.80

<sup>1</sup>H NMR (CDCl<sub>3</sub>)

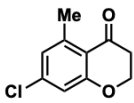

4f

4.49  
4.48  
4.47

2.80  
2.78  
2.77  
2.62

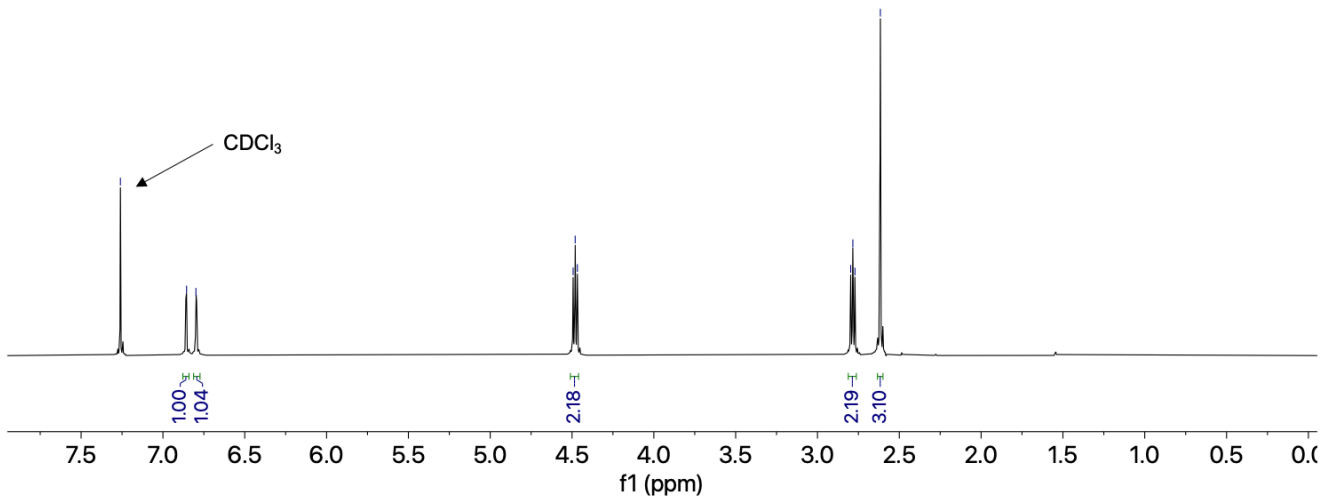

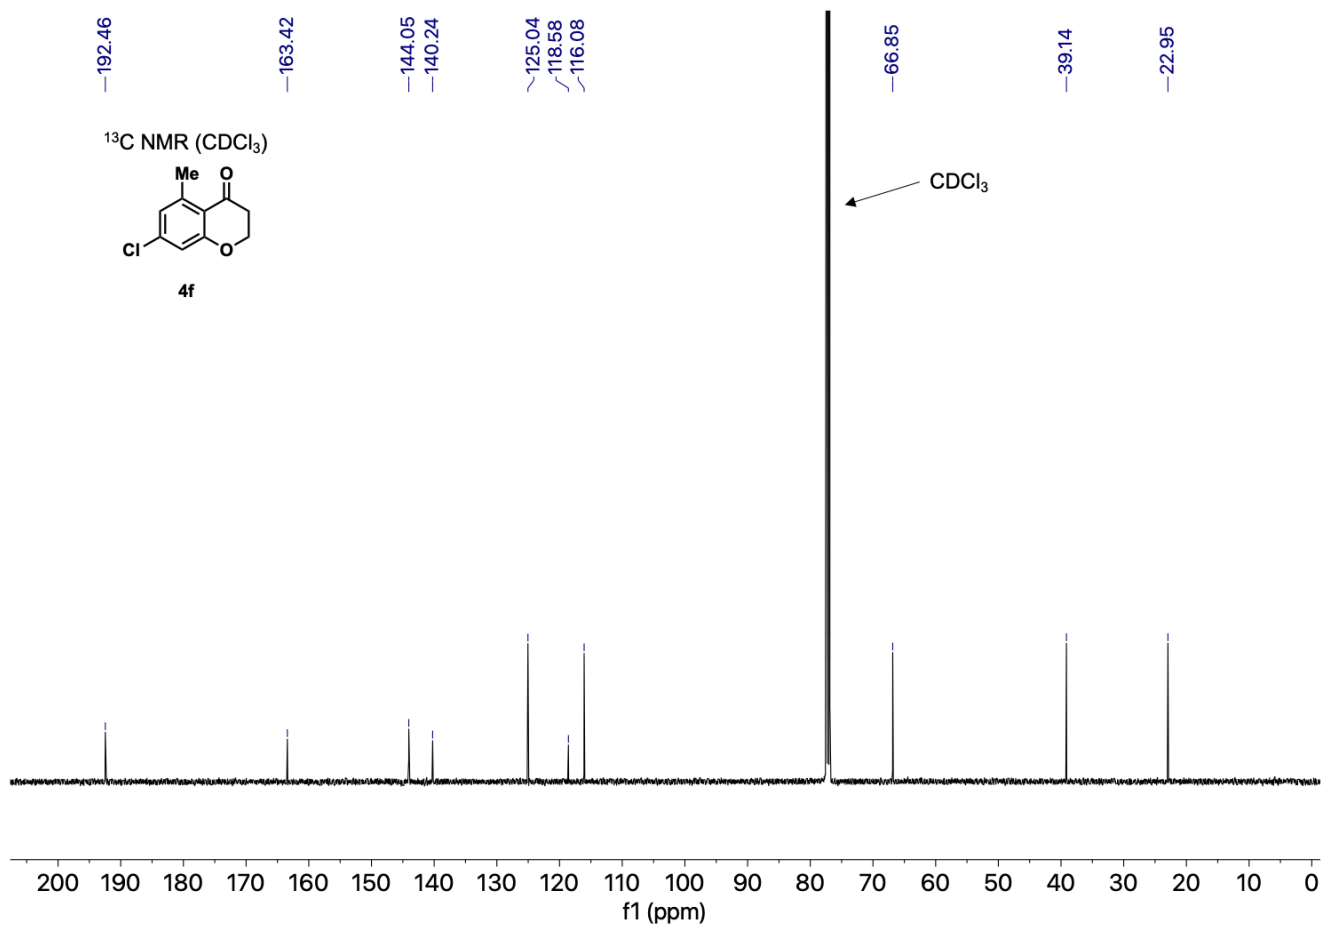

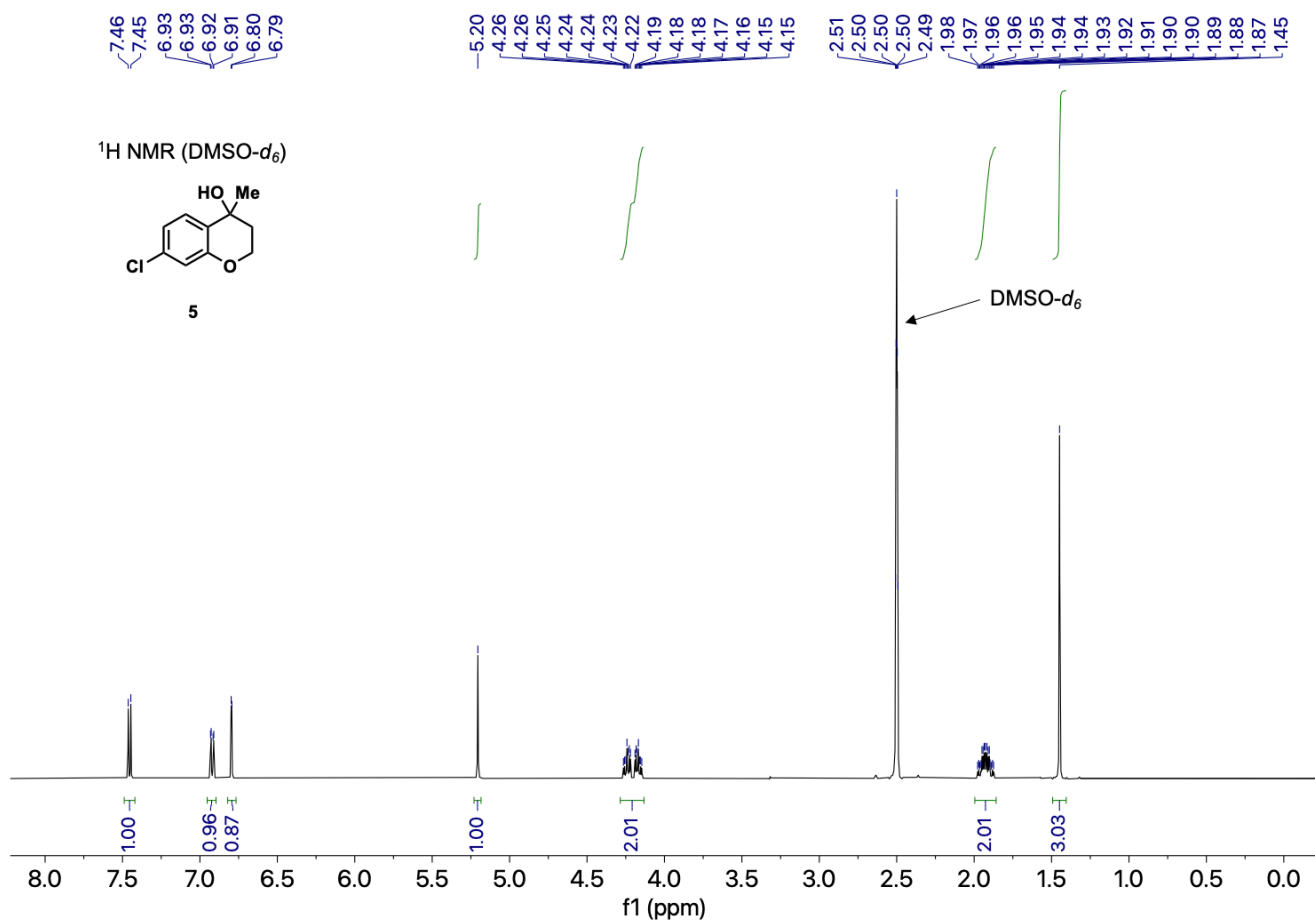

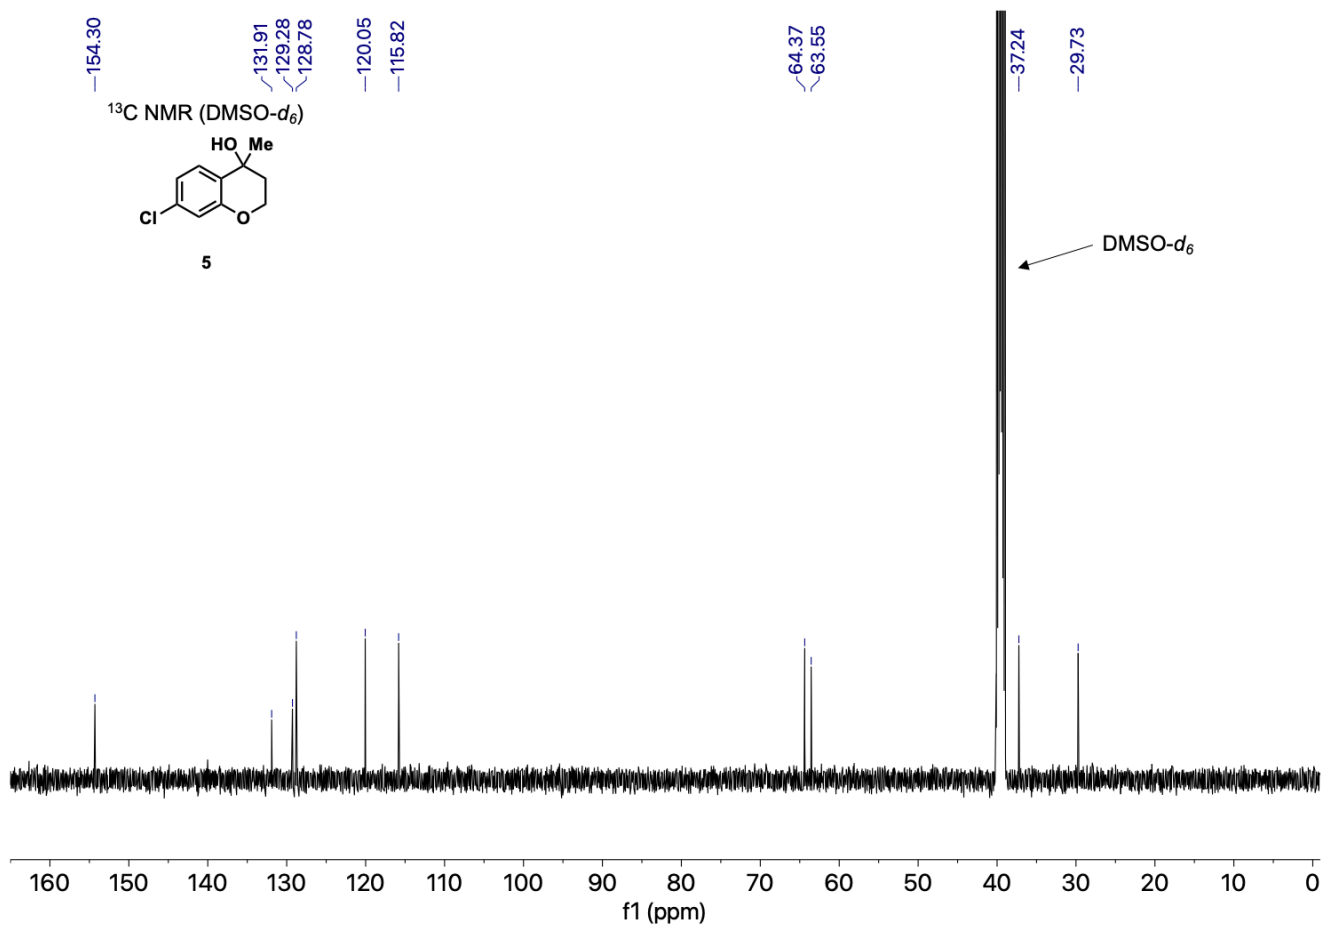

7.34  
7.32  
7.26  
6.91  
6.91  
6.90  
6.89  
6.85  
6.84

4.26  
4.24

2.15  
1.86  
1.74

0.92  
0.90  
0.89

<sup>1</sup>H NMR (CDCl<sub>3</sub>)

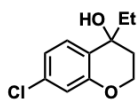

6

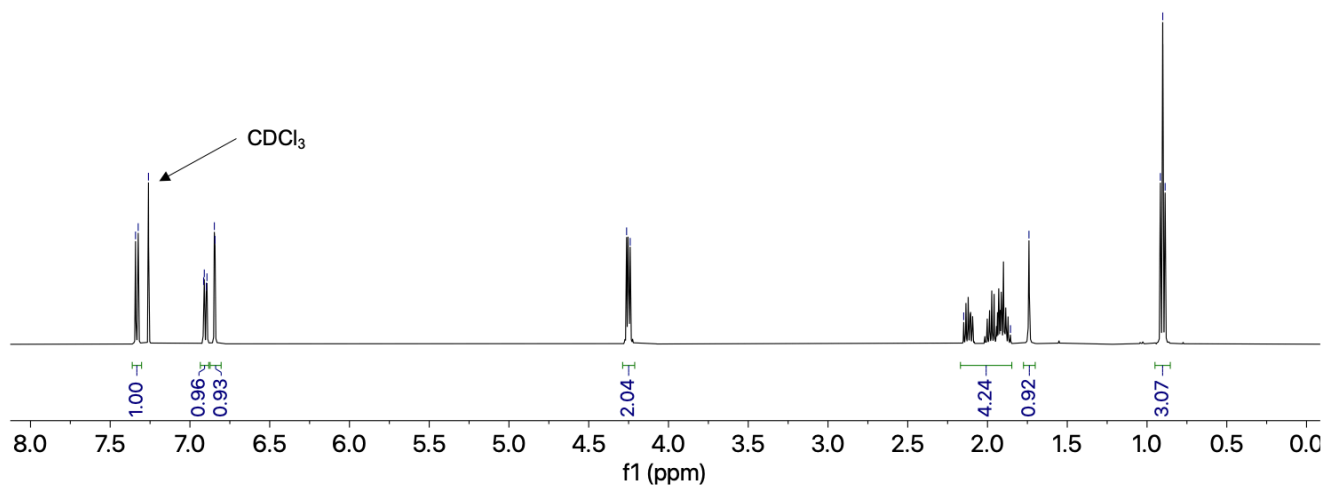

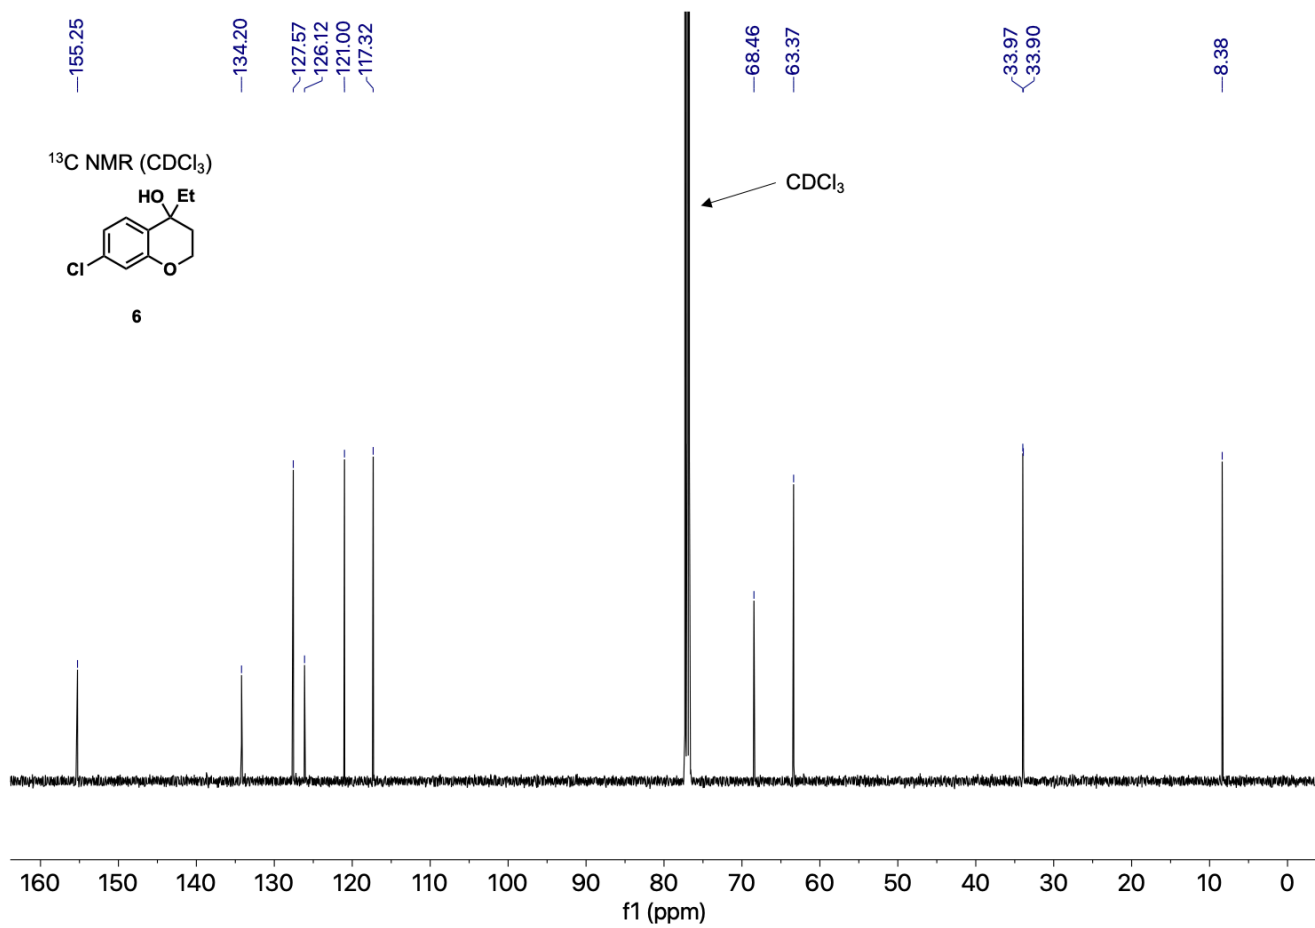

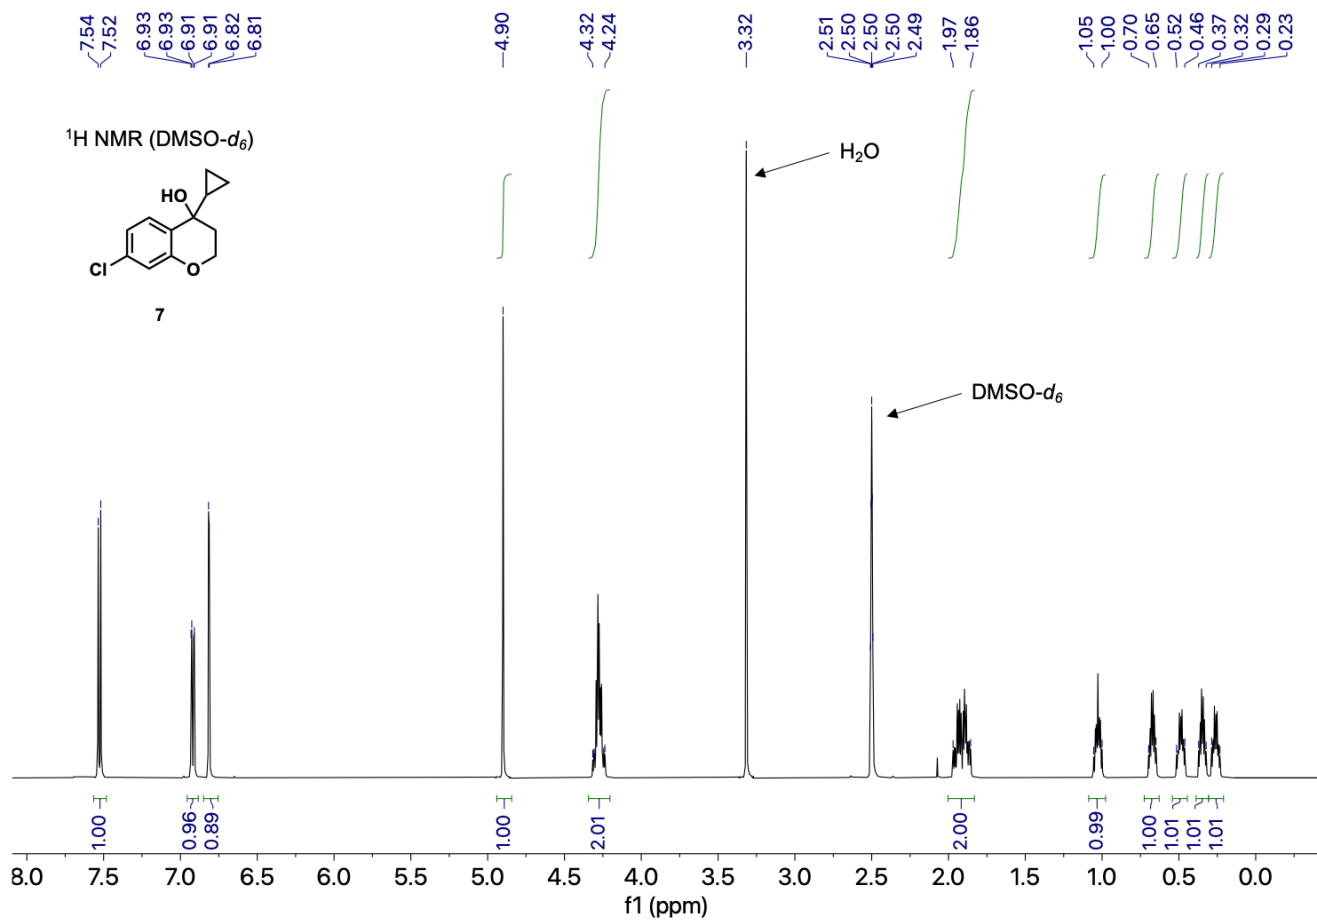



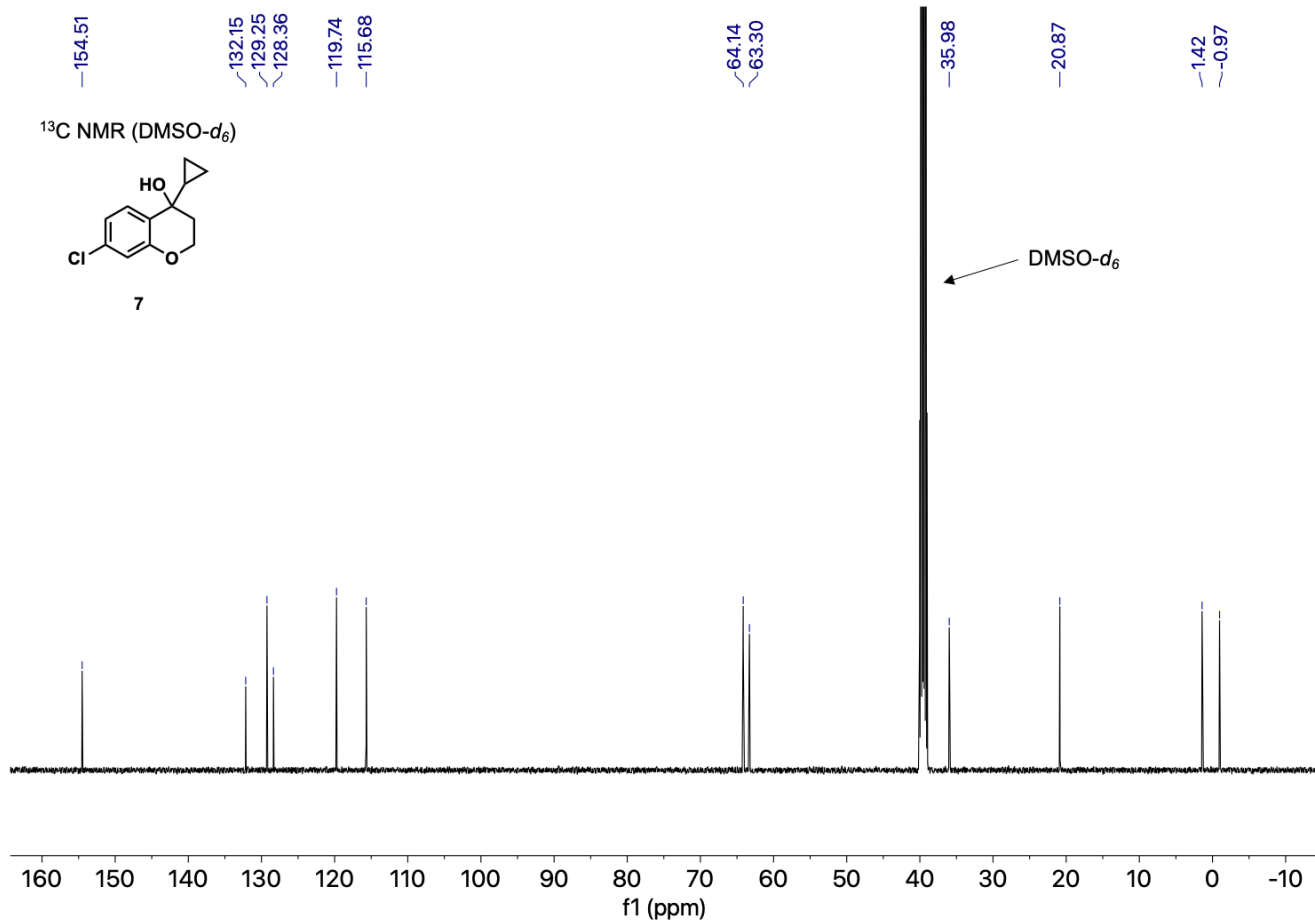

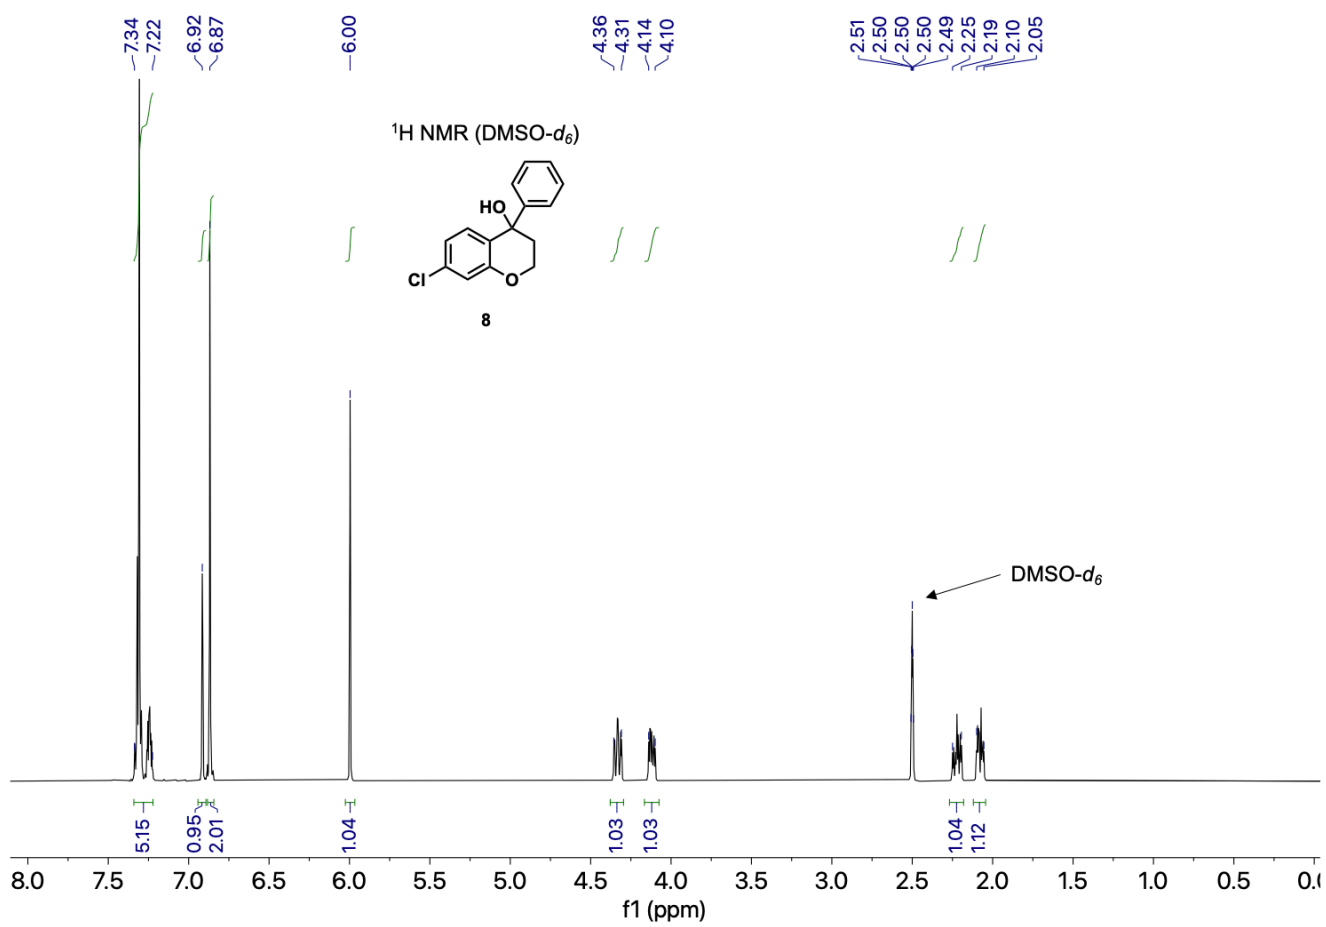

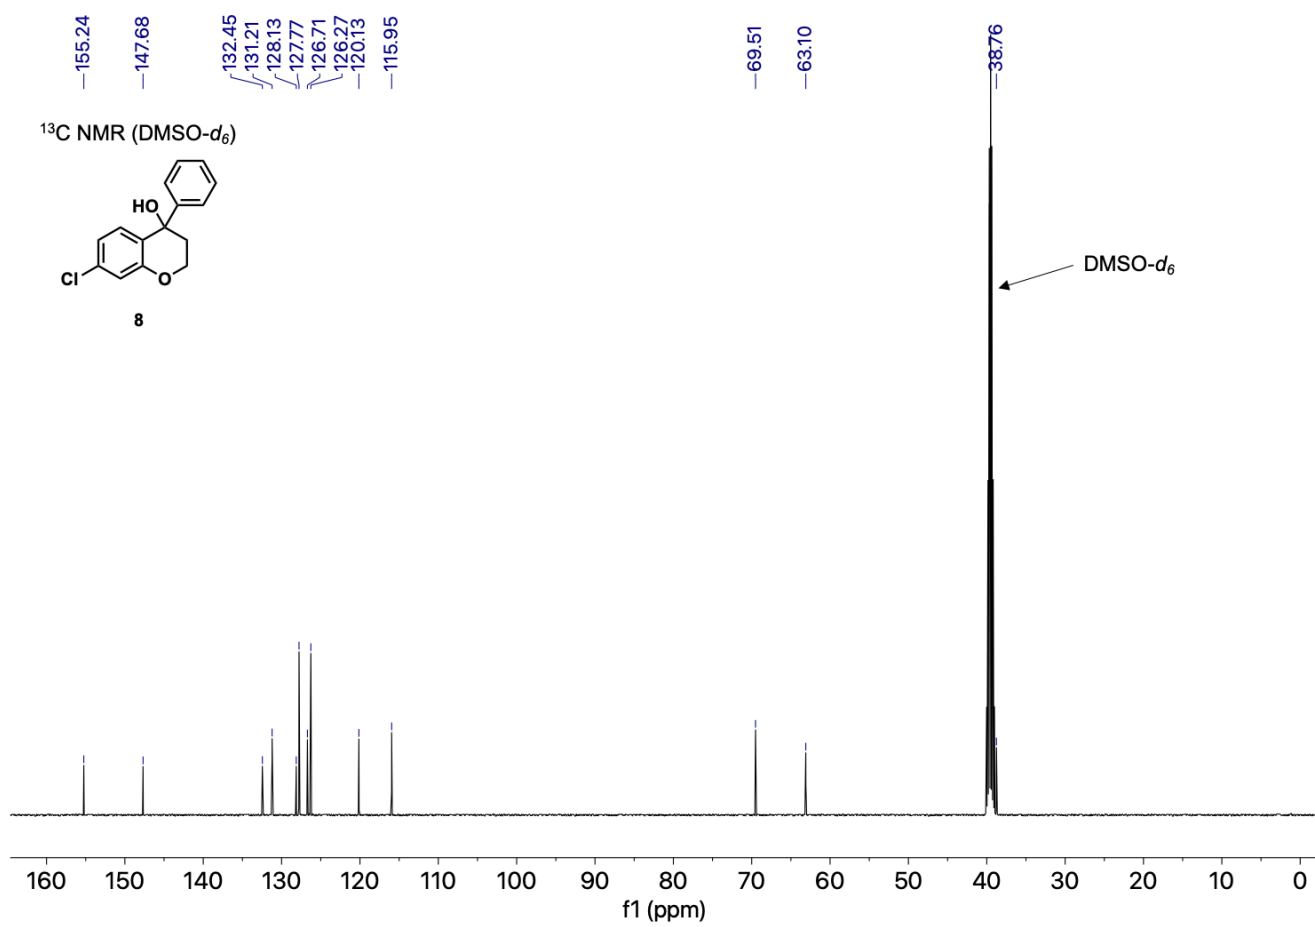

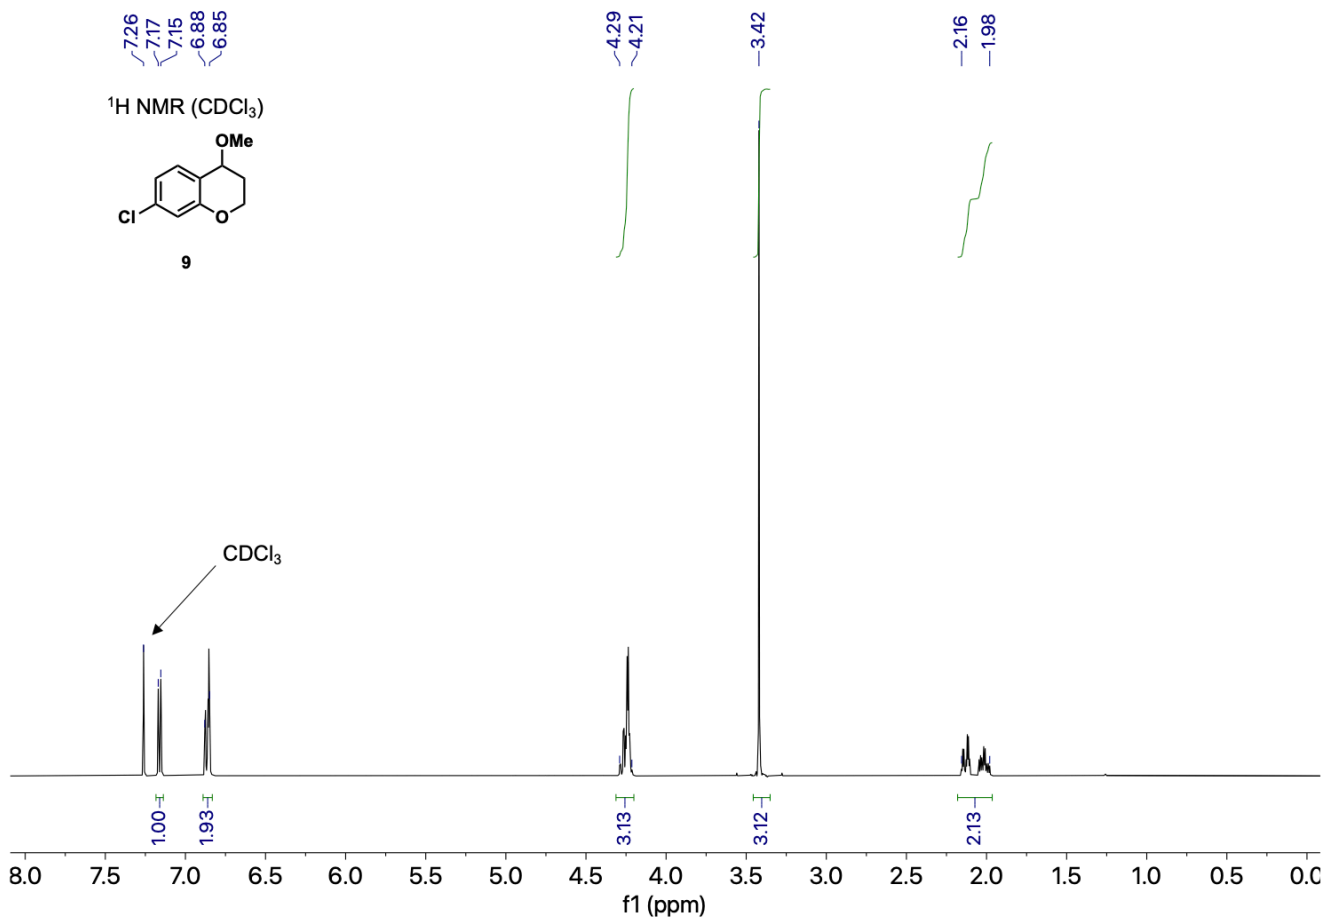

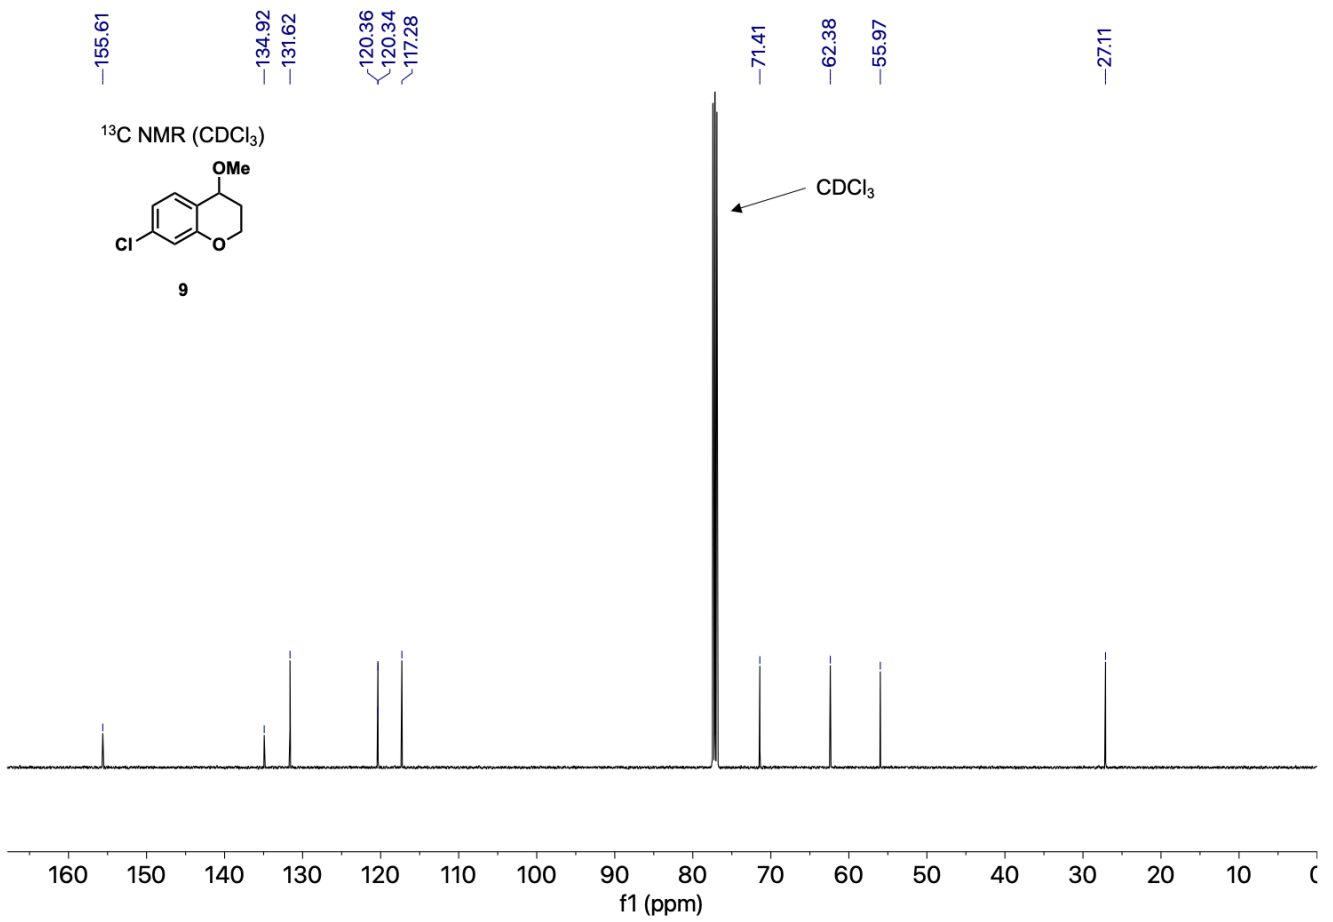

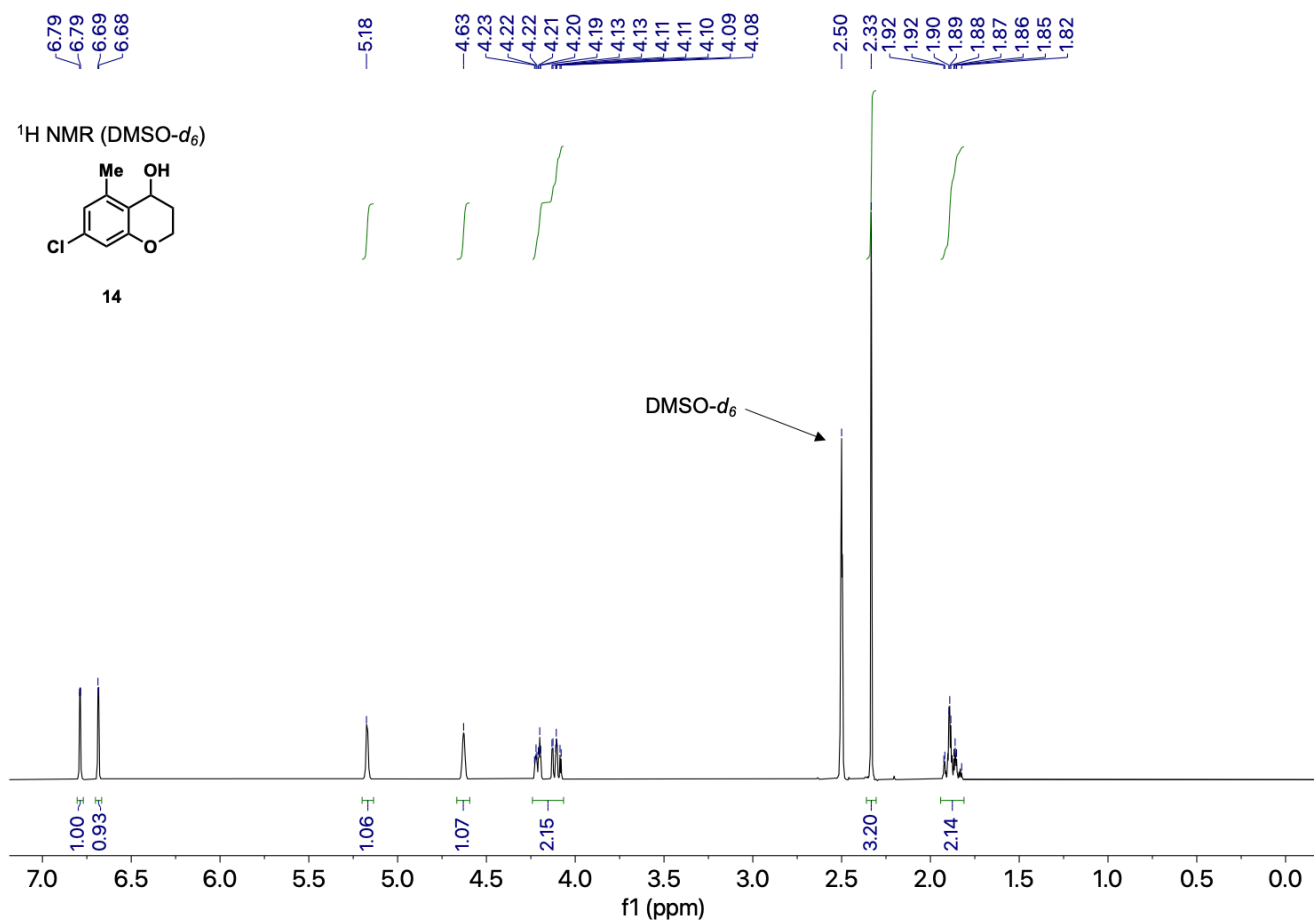

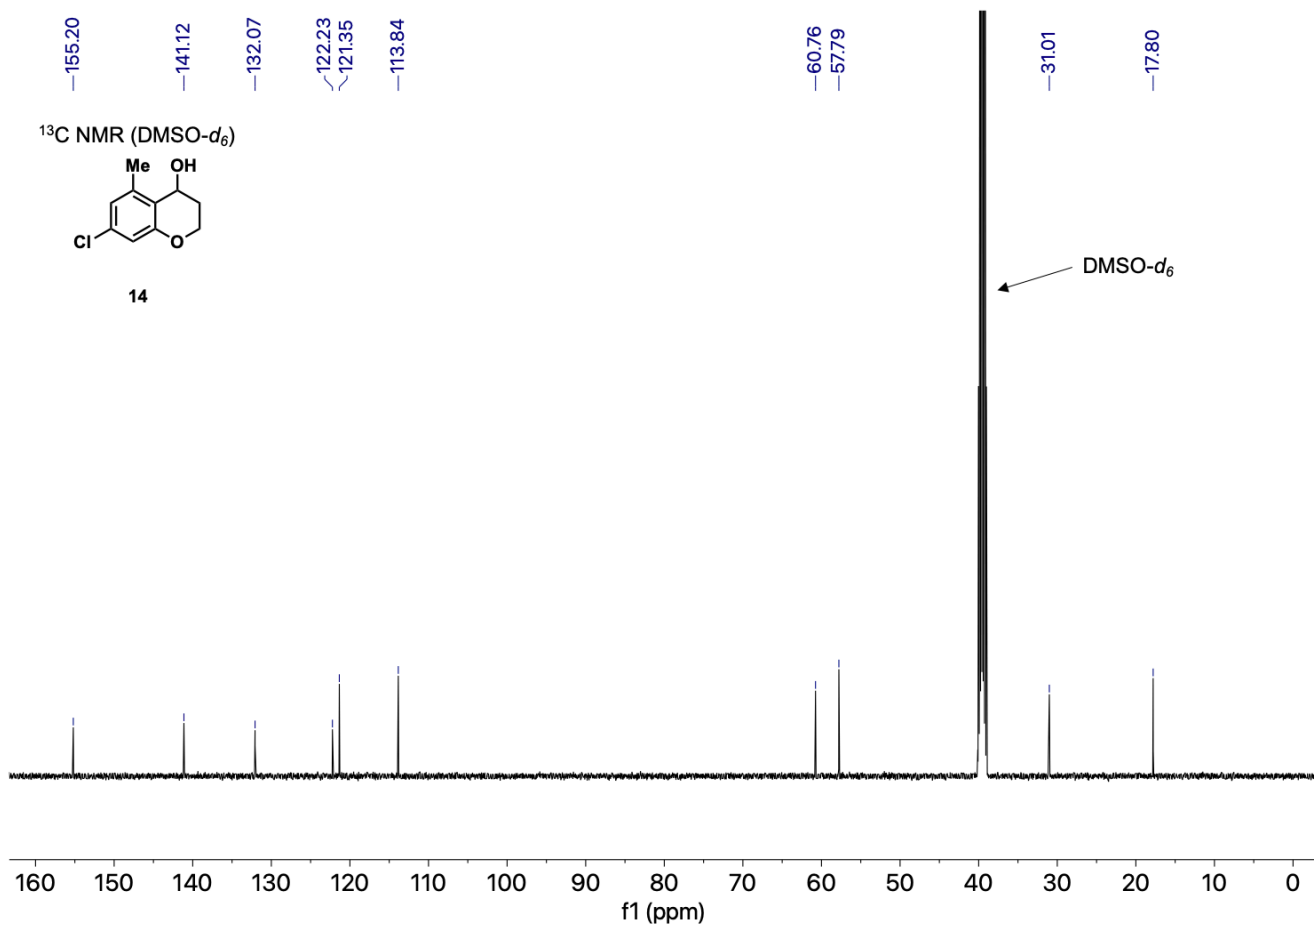

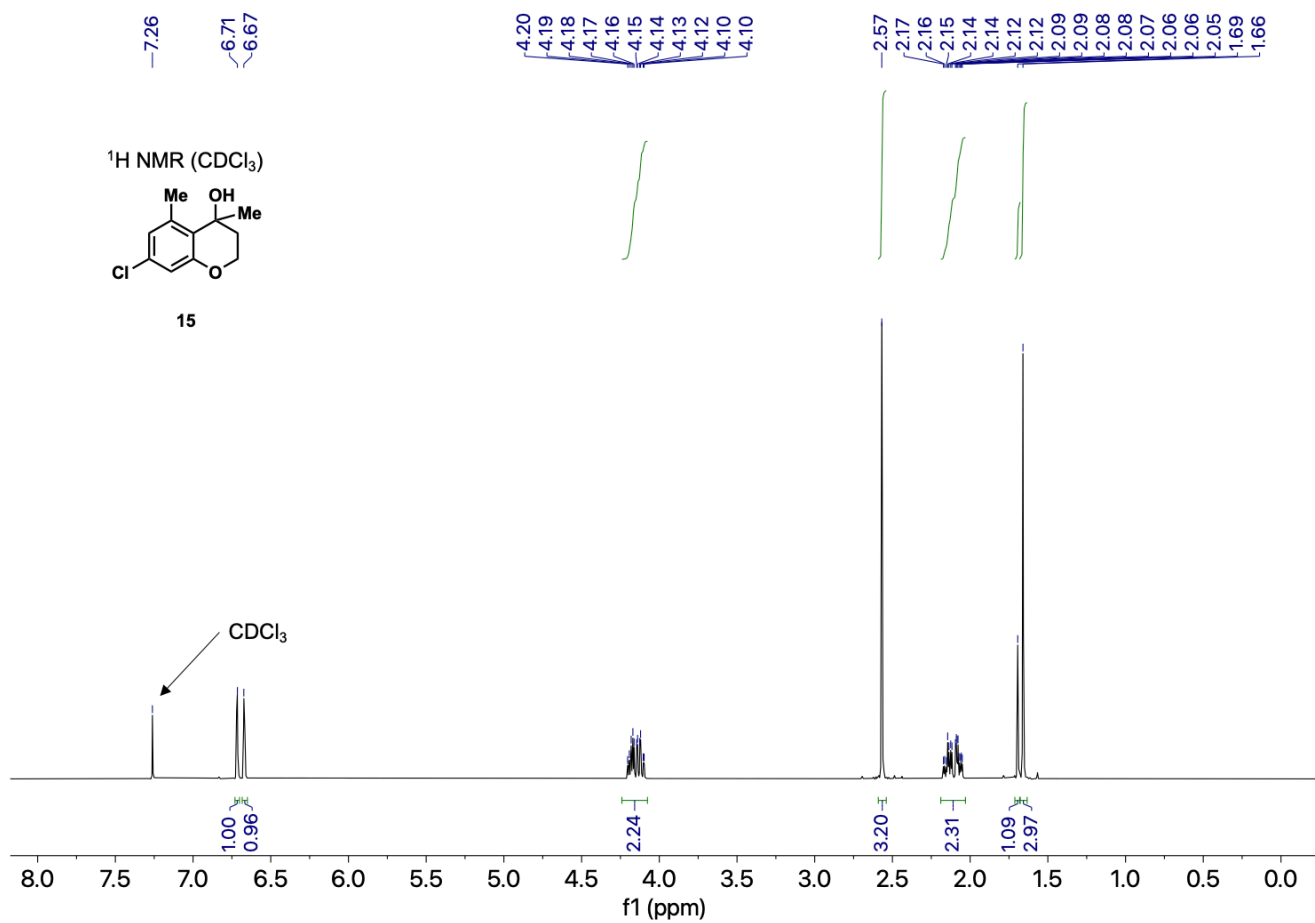



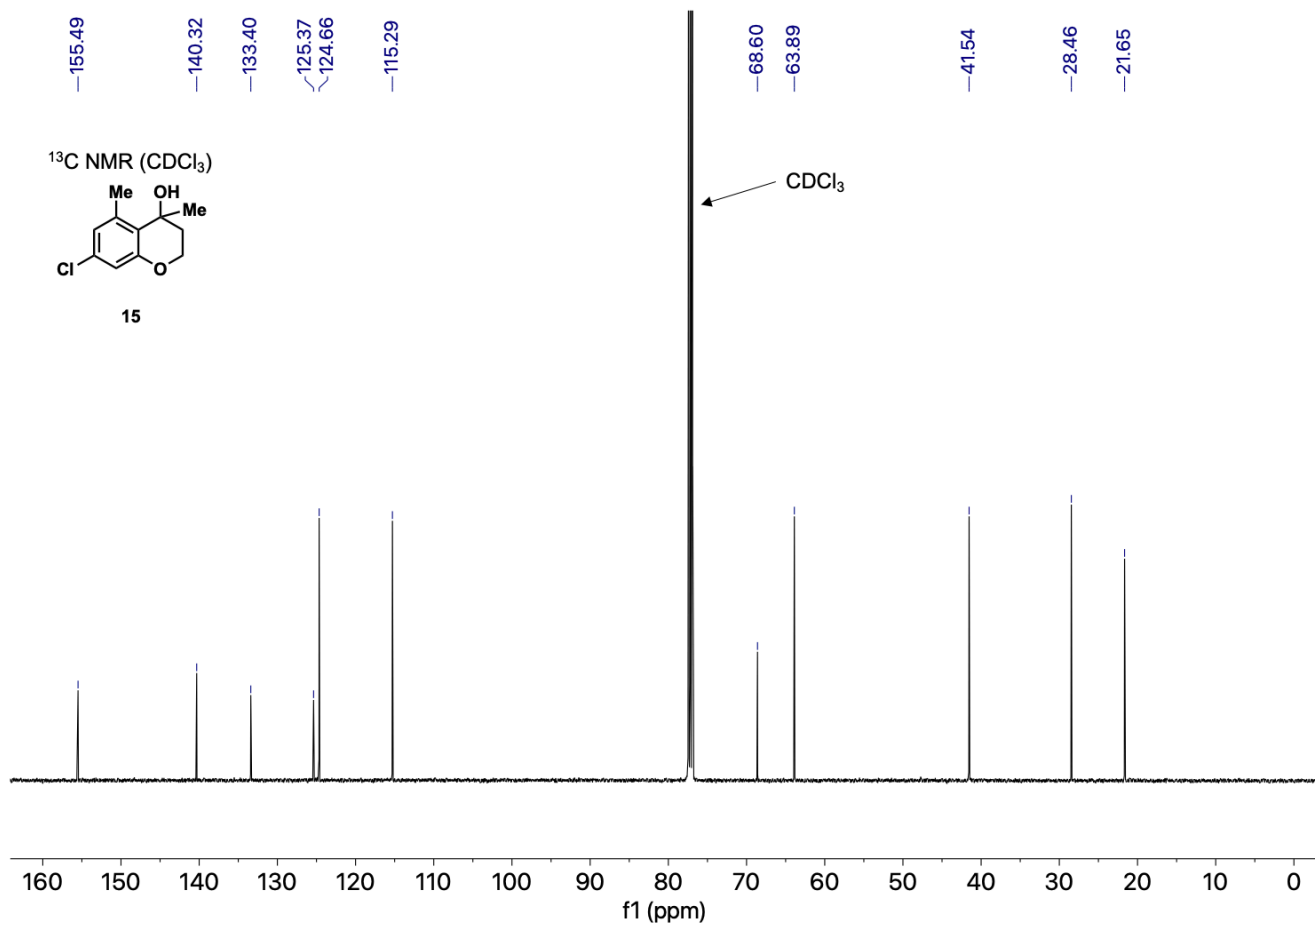

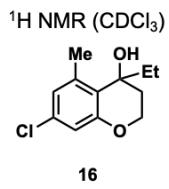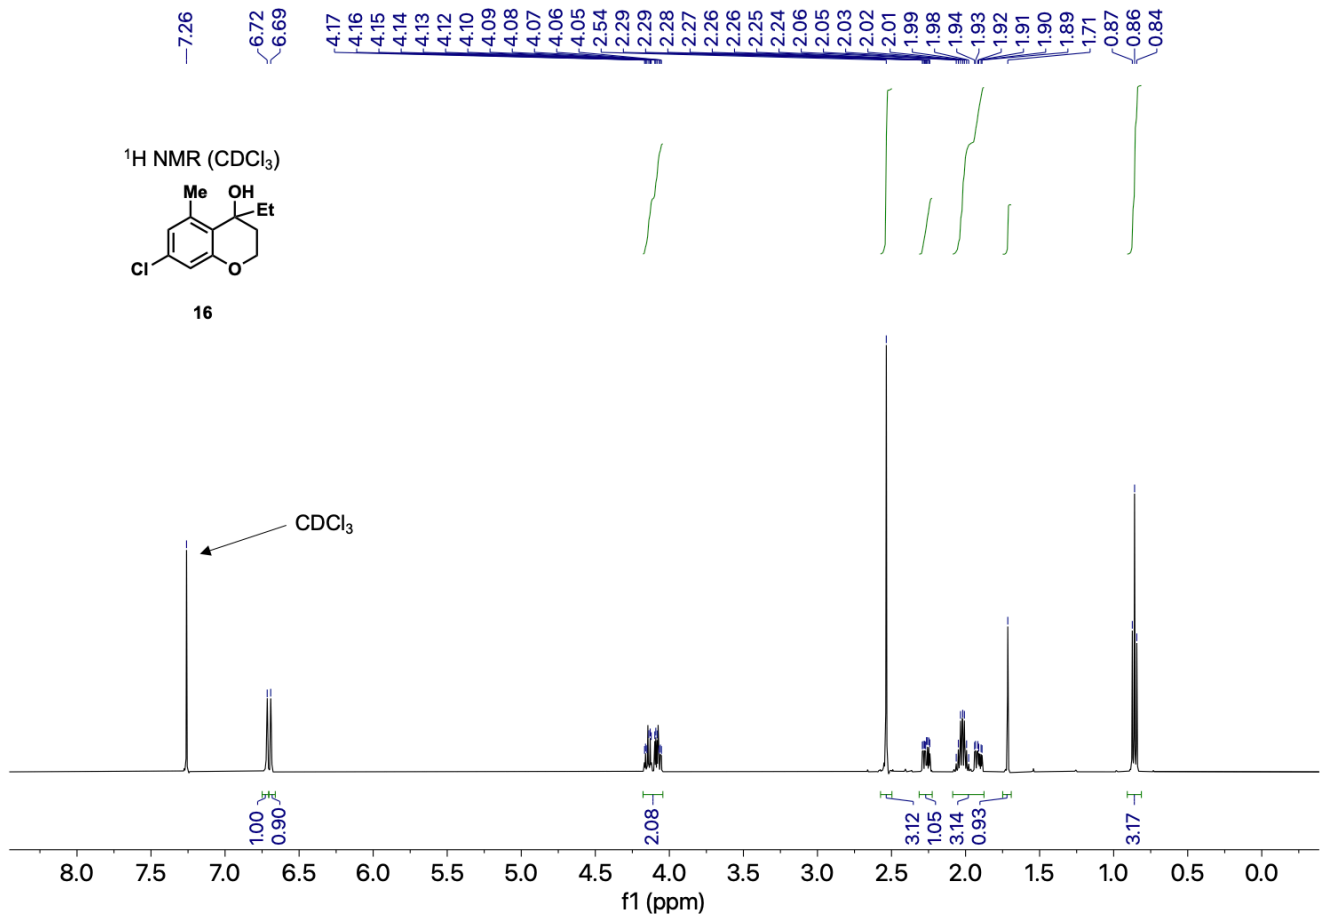

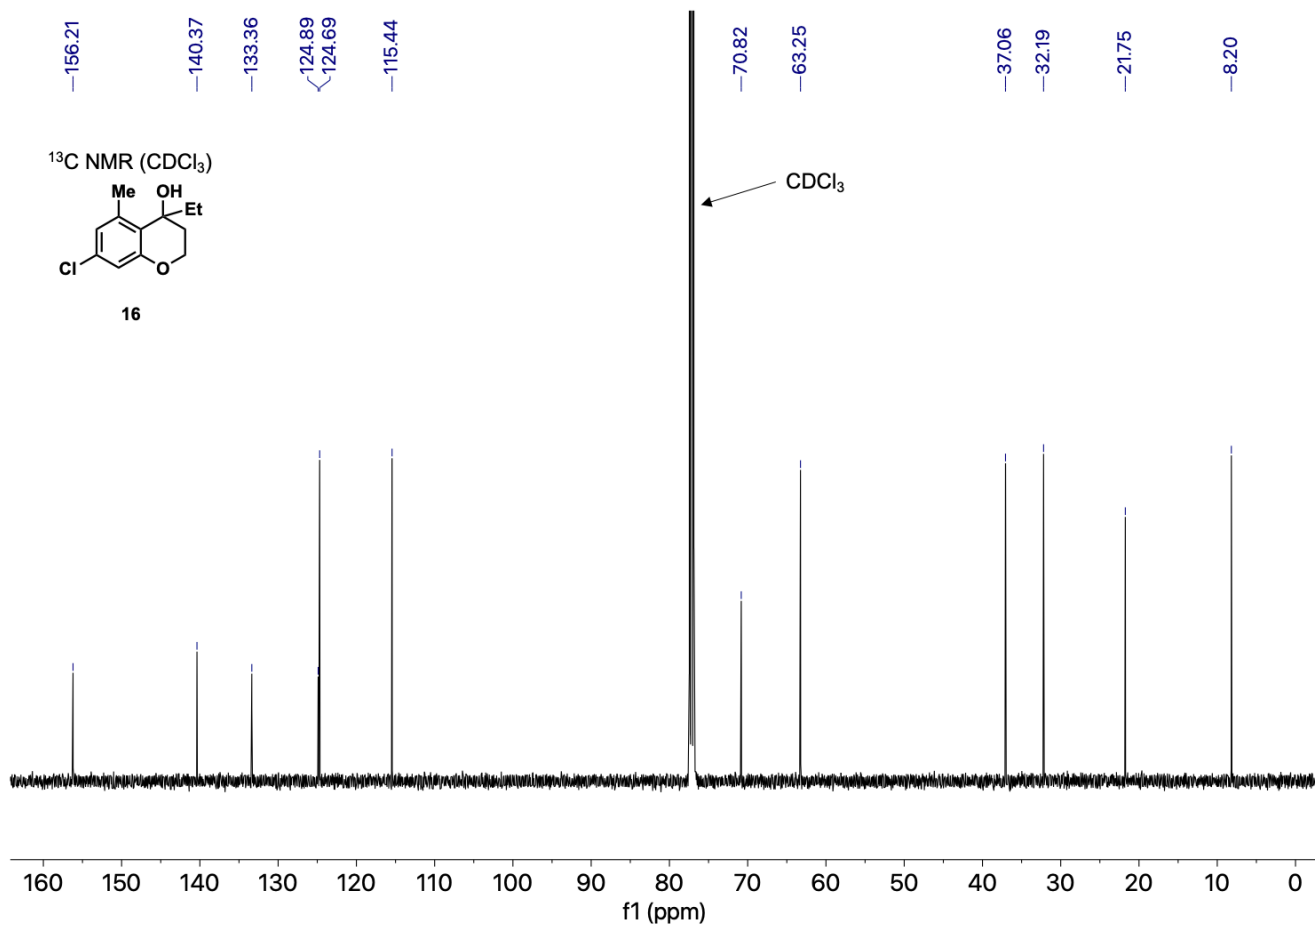

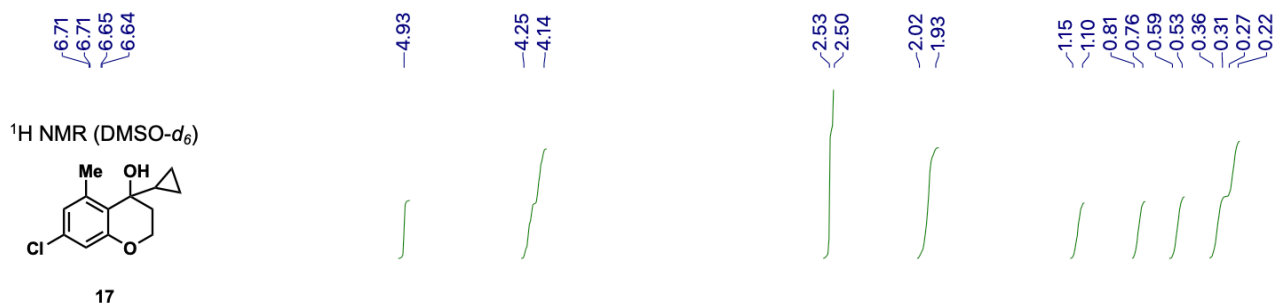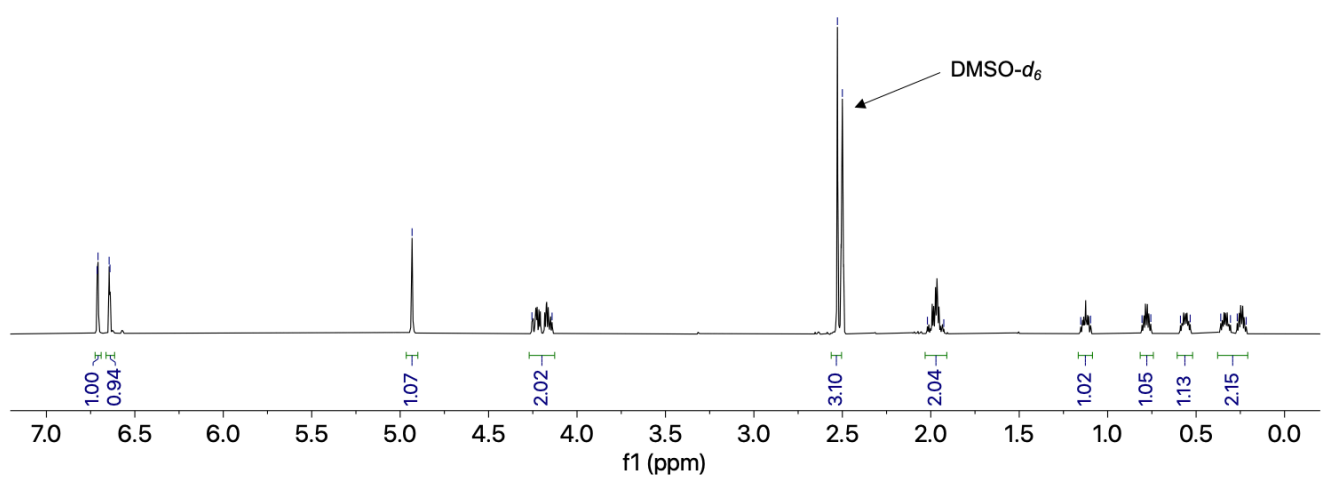

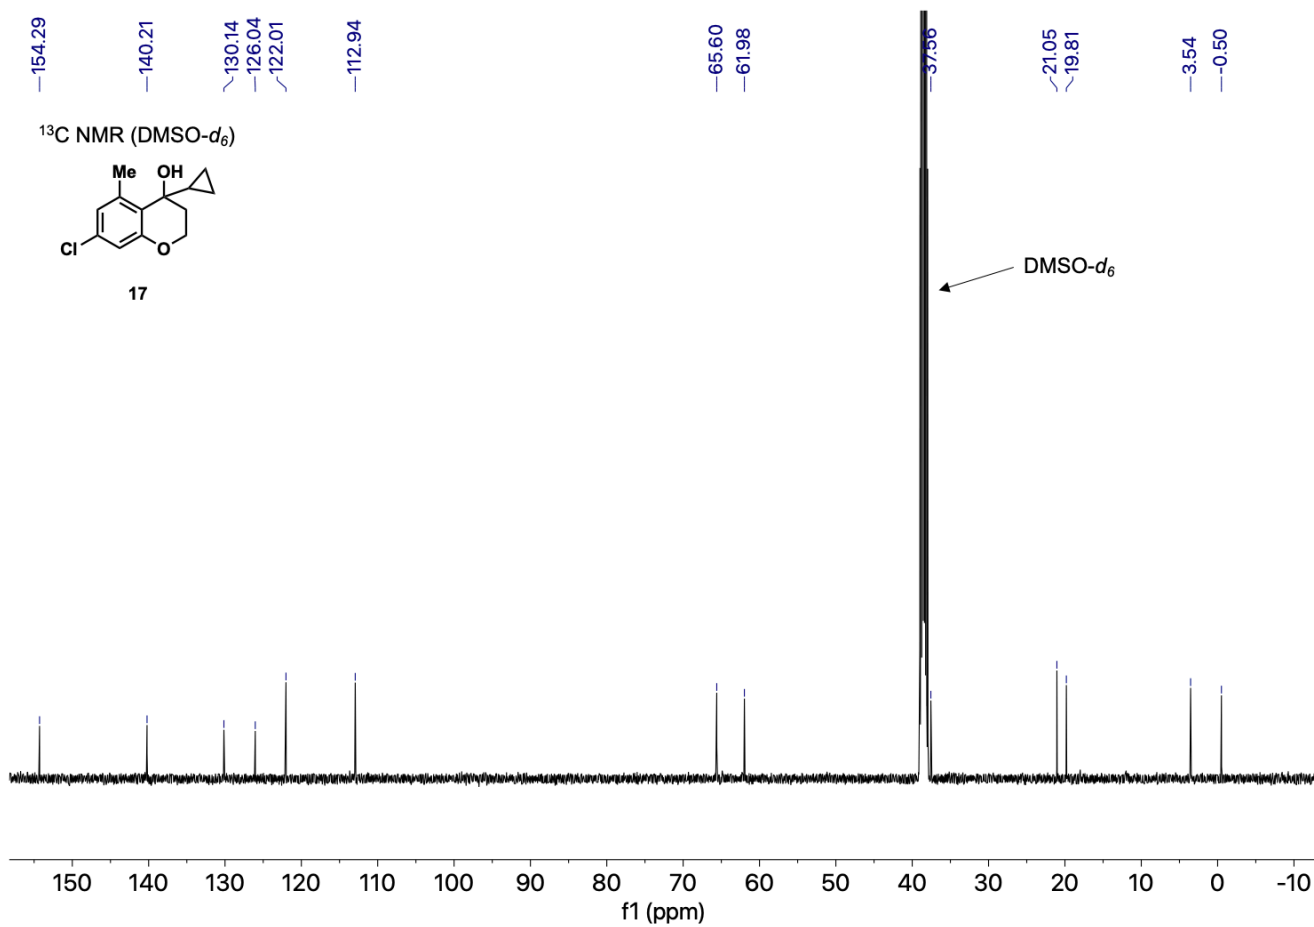

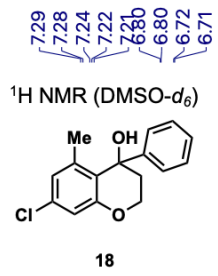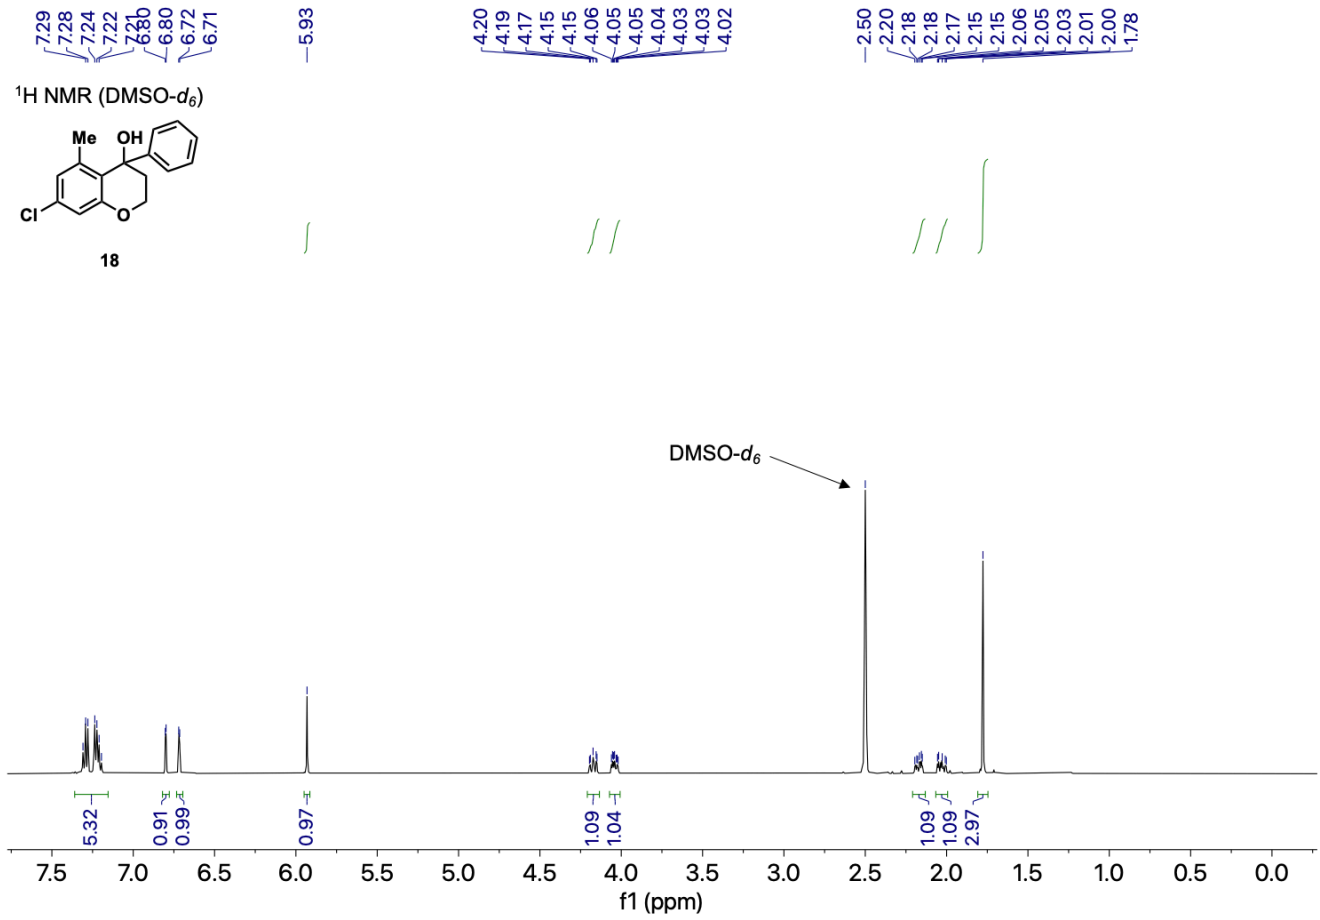

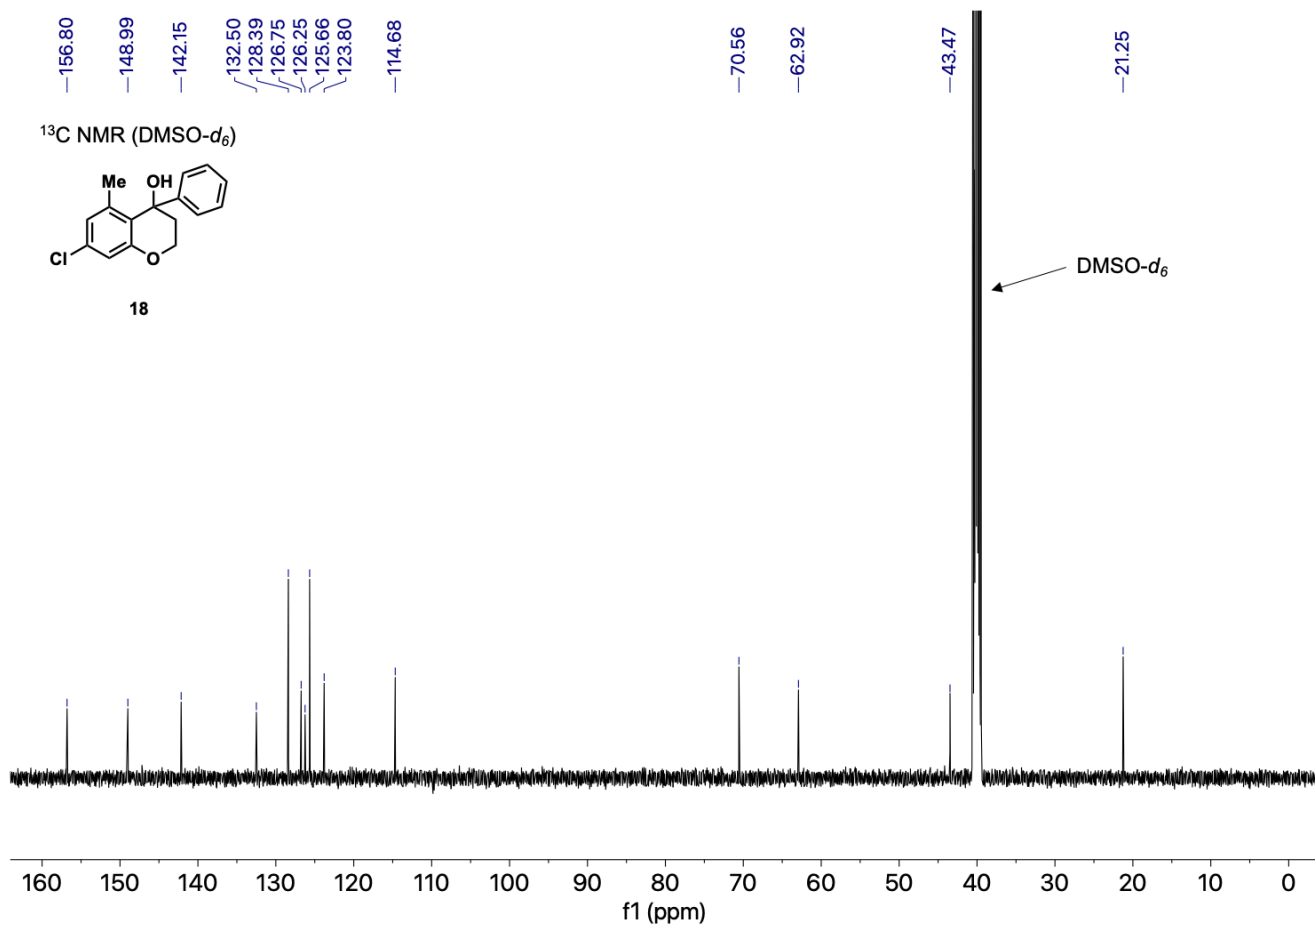

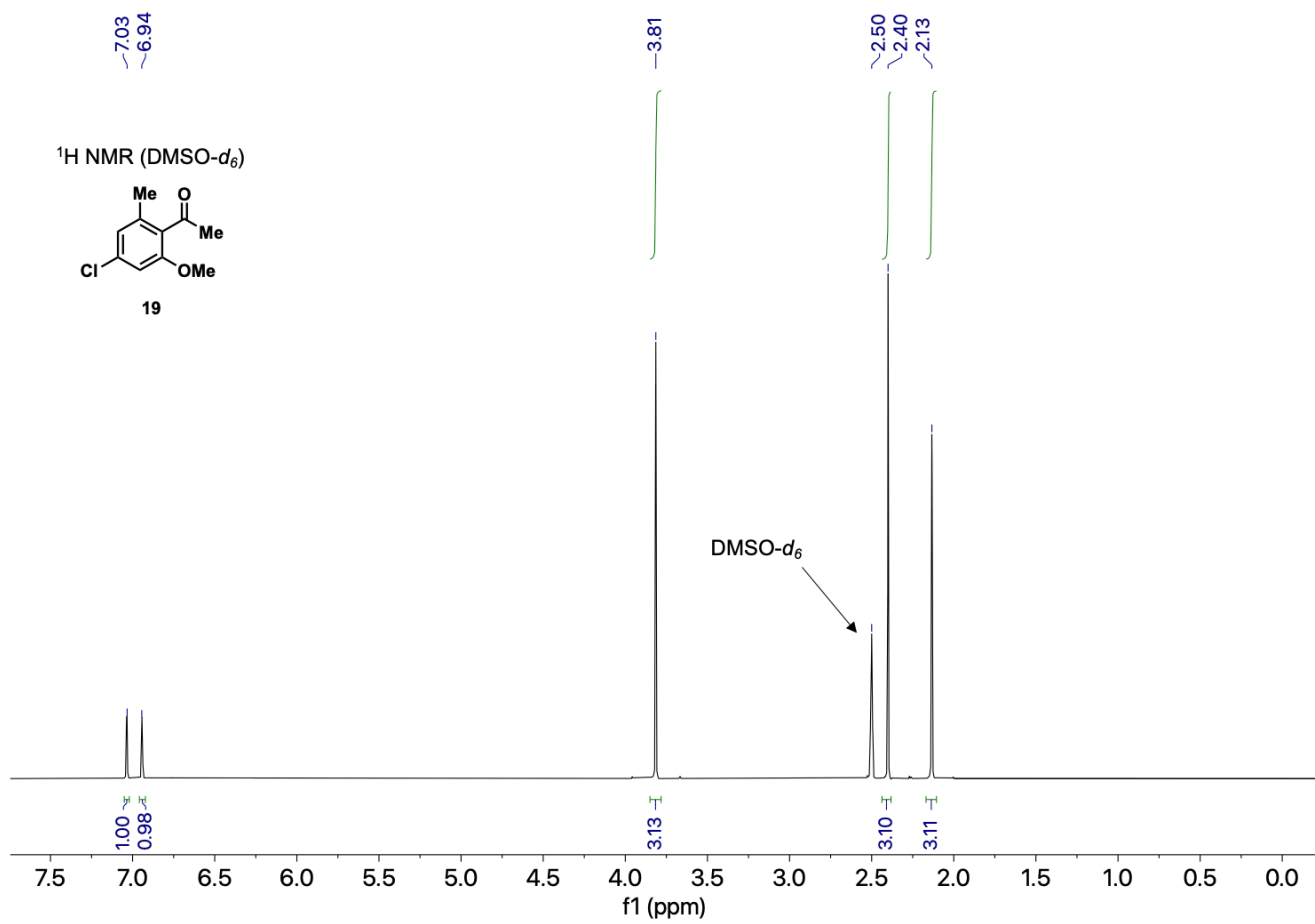



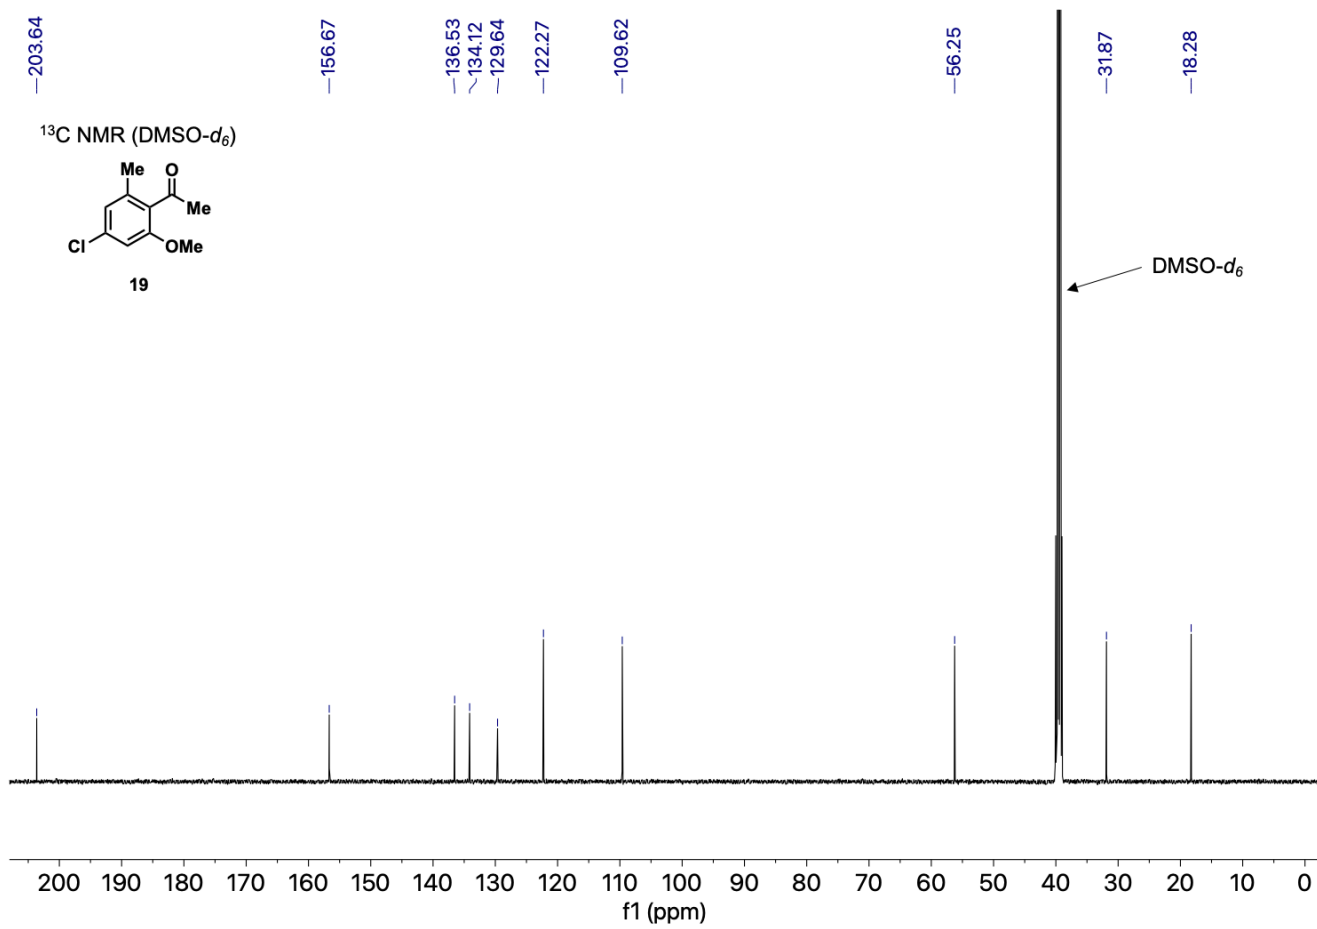

<sup>1</sup>H NMR (DMSO-d<sub>6</sub>)

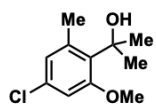

20

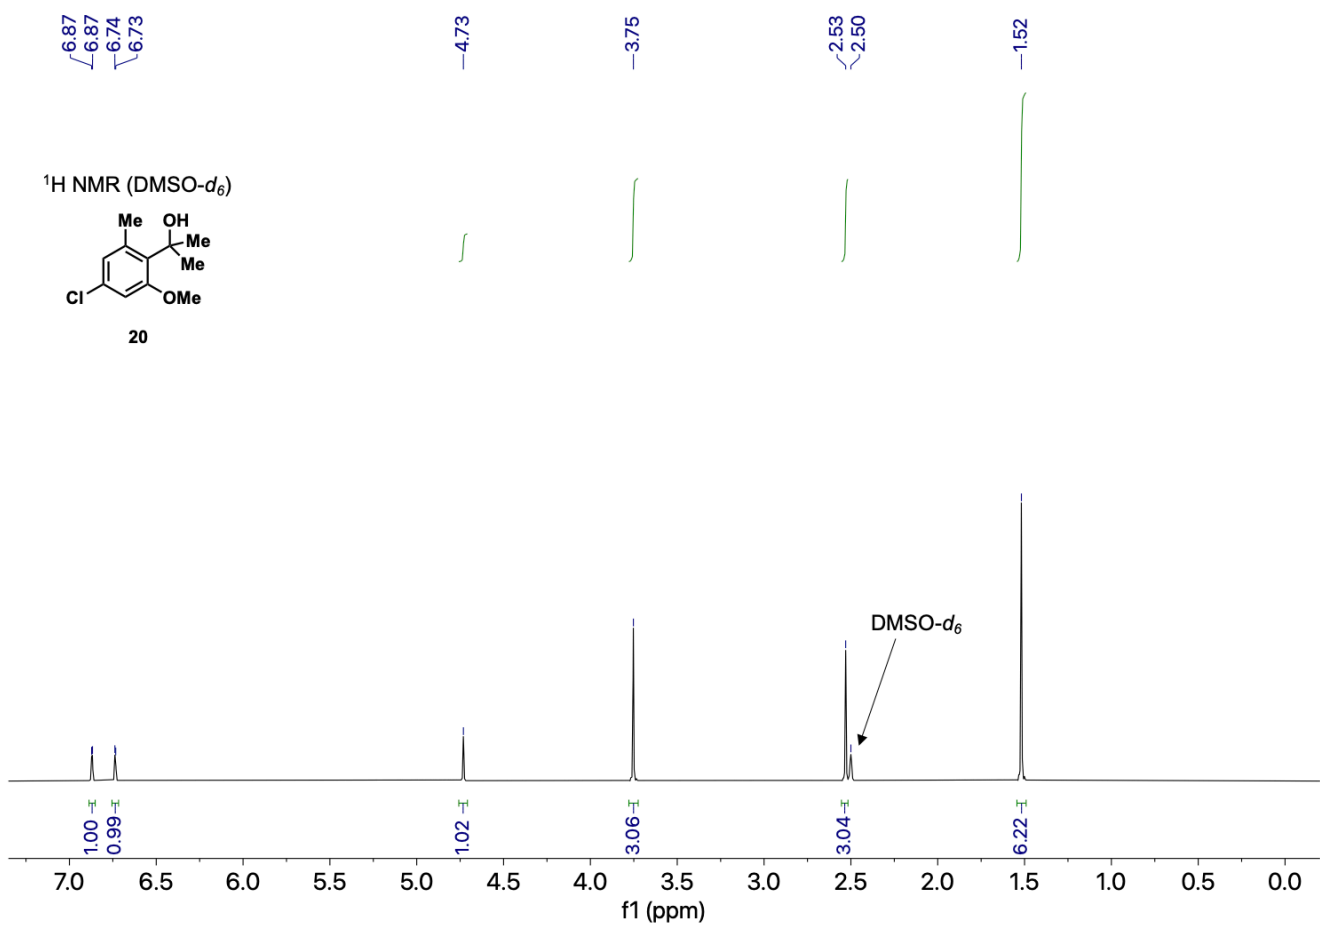

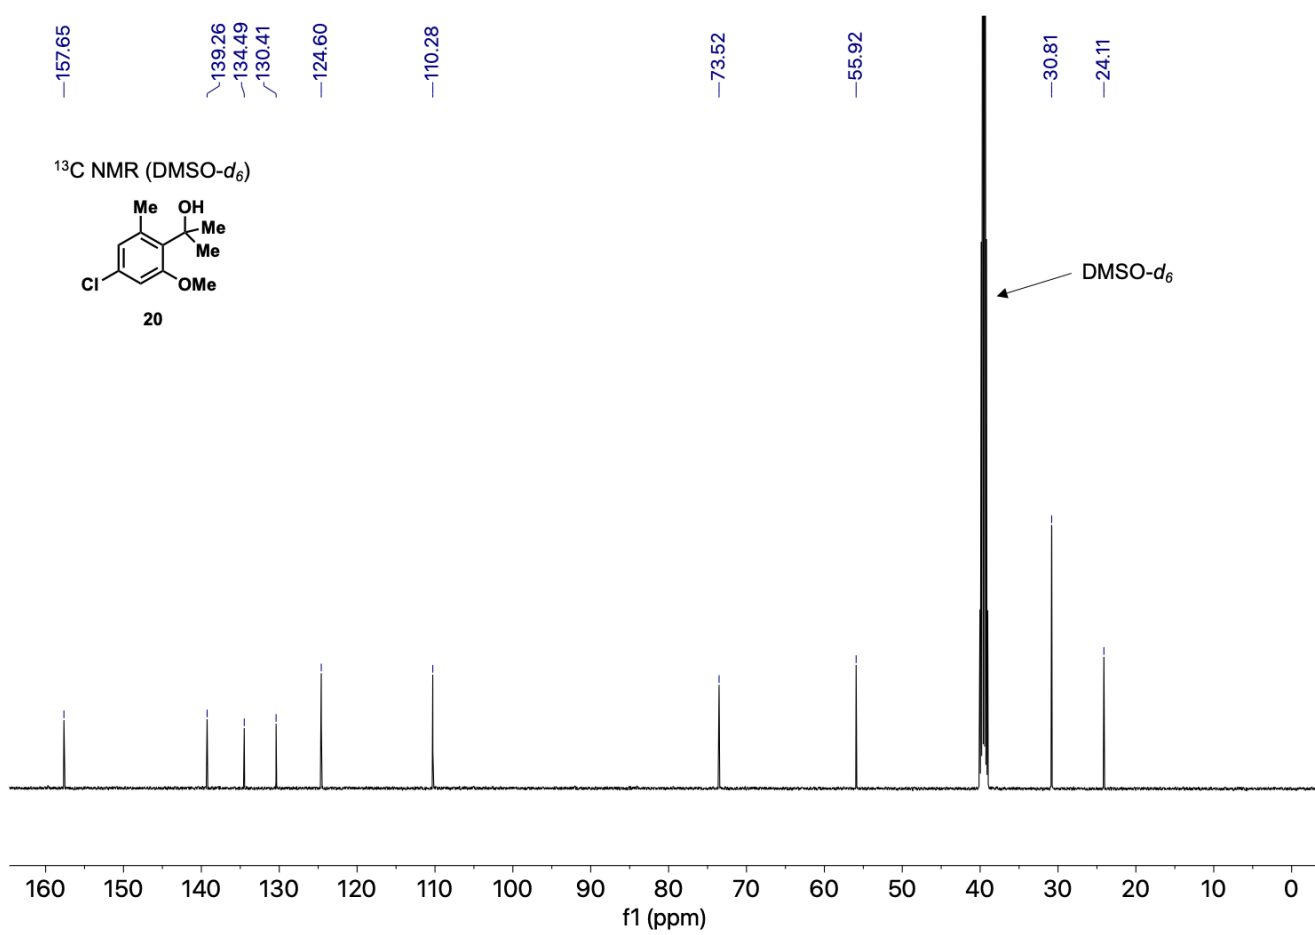

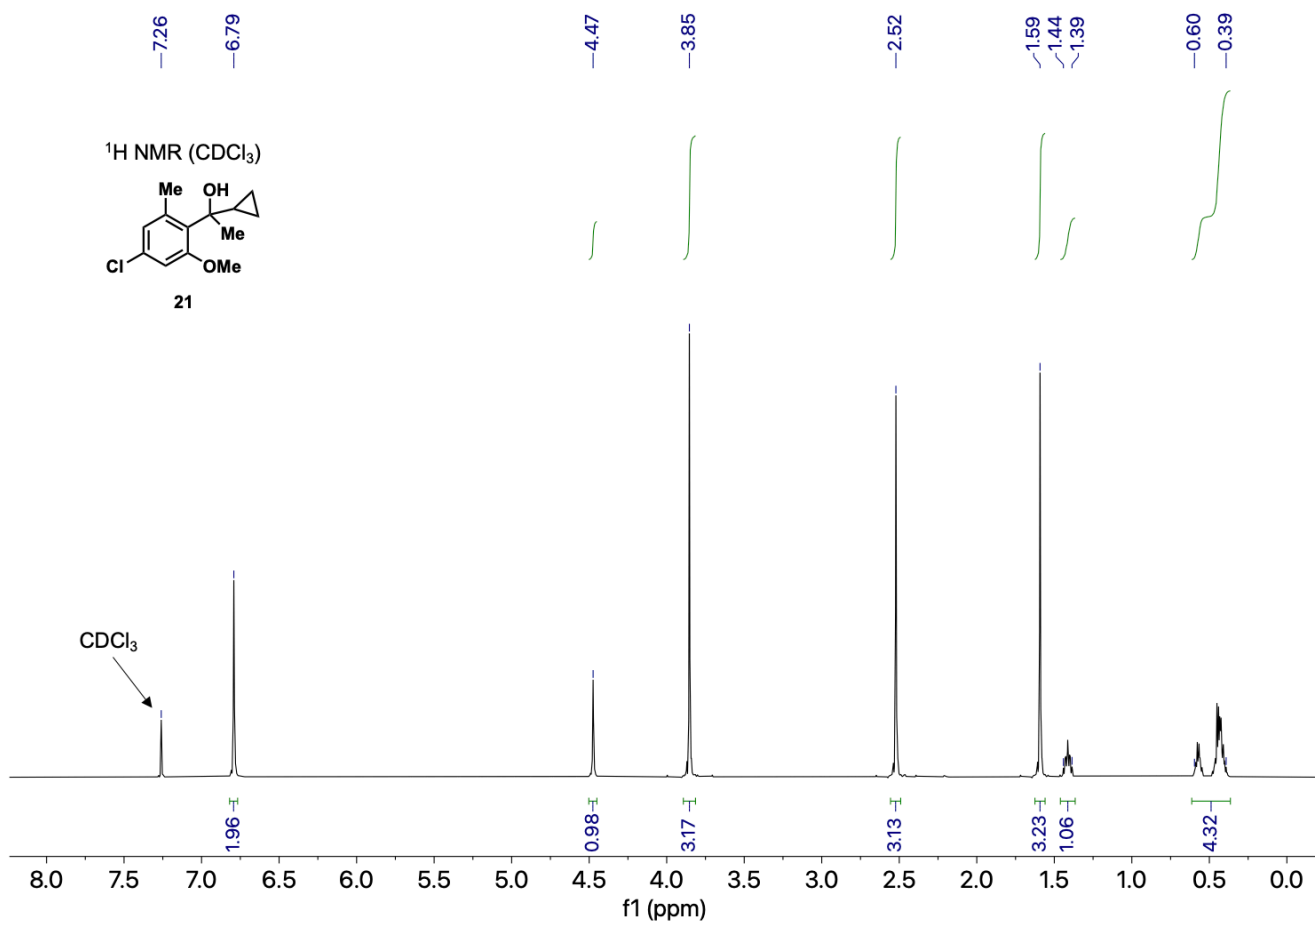

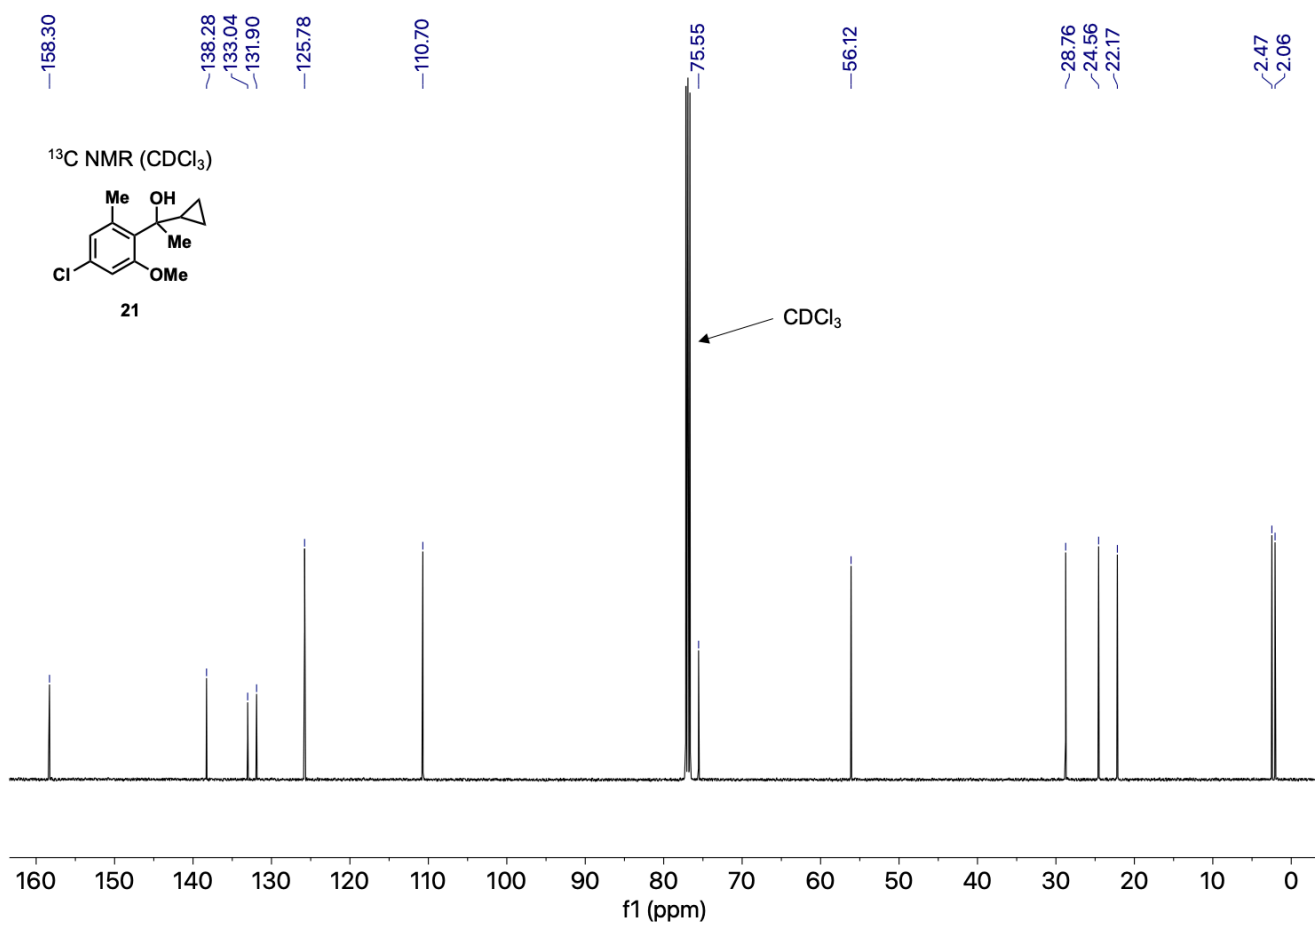

7.32  
7.27  
7.26  
7.22  
7.18  
6.81  
6.80  
6.77  
6.74

<sup>1</sup>H NMR (CDCl<sub>3</sub>)

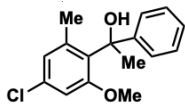

22

-4.77

-3.57

-2.26

-1.95

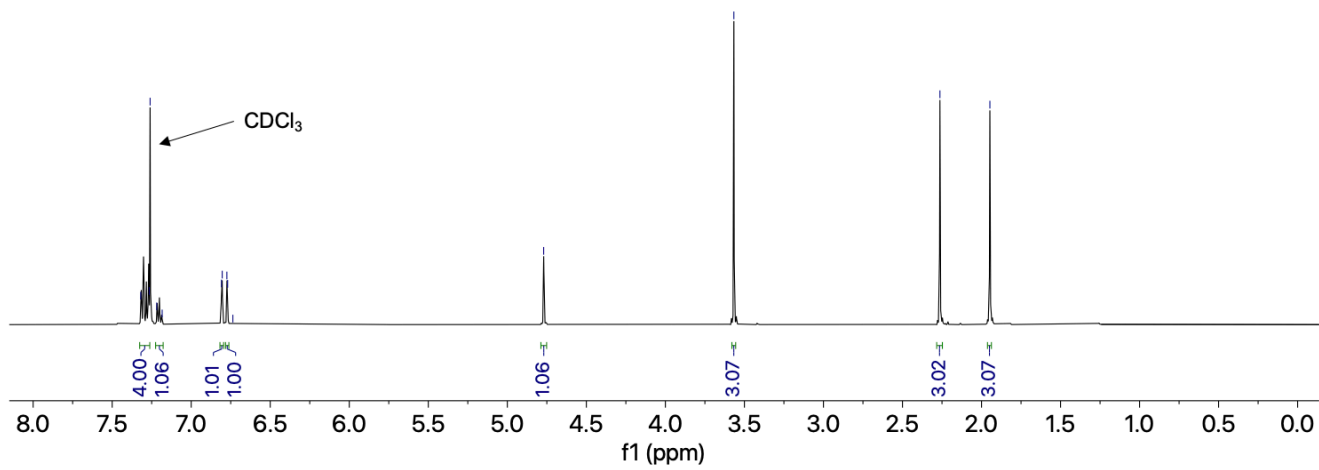

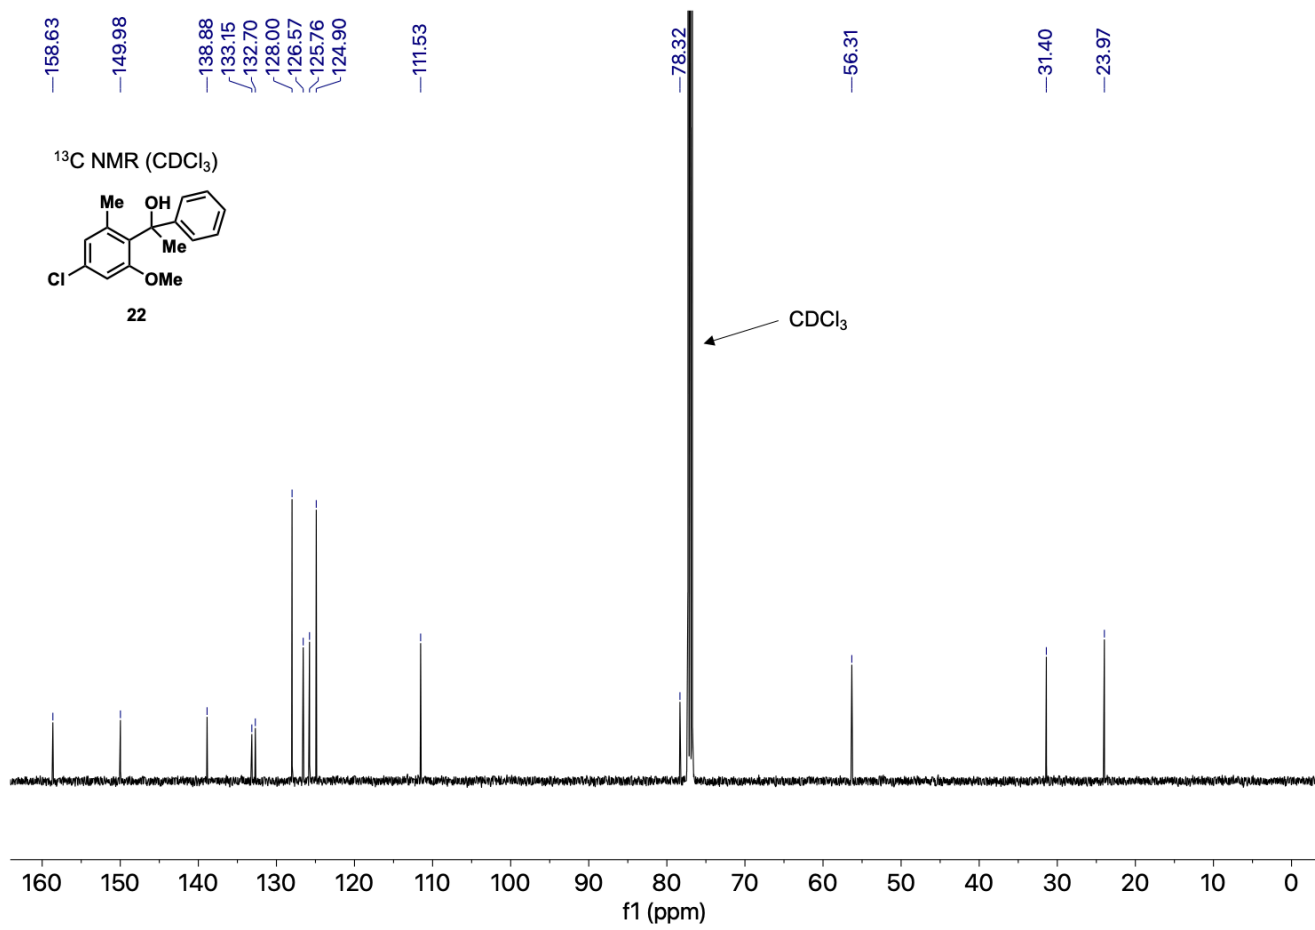

Supplementary Tables

Table S1. Affinity and LE of compounds 14-18

| Compound | Structure                                                                           | SPR $K_d$ ( $\mu$ M) - AMP-PNP <sup>a</sup><br>SPR $K_d$ ( $\mu$ M) + AMP-PNP | LE <sup>b</sup> |
|----------|-------------------------------------------------------------------------------------|-------------------------------------------------------------------------------|-----------------|
| 14       | 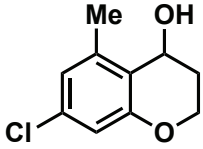   | > 1 mM<br>> 1 mM                                                              | —               |
| 15       |    | > 1 mM<br>> 1 mM                                                              | —               |
| 16       |    | > 1 mM<br>> 1 mM                                                              | —               |
| 17       |  | > 1 mM<br>> 1 mM                                                              | —               |
| 18       |  | 367 $\pm$ 23<br>717 $\pm$ 46                                                  | 0.25            |

<sup>a</sup> $K_d$  values shown represent the mean  $\pm$  SEM of two determinations. <sup>b</sup>LE = 1.37p $K_d$ /HA (heavy atom count).



Table S2. Affinity and LE of compounds 20-22

| Compound | Structure                                                                         | SPR $K_d$ ( $\mu$ M) - AMP-PNP <sup>a</sup><br>SPR $K_d$ ( $\mu$ M) + AMP-PNP | LE <sup>b</sup> |
|----------|-----------------------------------------------------------------------------------|-------------------------------------------------------------------------------|-----------------|
| 20       | 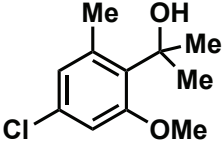 | > 1 mM<br>> 1 mM                                                              | —               |
| 21       |  | 150 $\pm$ 53<br>143 $\pm$ 83                                                  | 0.33            |
| 22       |  | > 1 mM<br>> 1 mM                                                              | —               |

<sup>a</sup> $K_d$  values shown represent the mean  $\pm$  SEM of two determinations. <sup>b</sup>LE = 1.37p $K_d$ /HA (heavy atom count).

**Table S3. Structures, HLB numbers, and SMILES of compounds 1, 5-18, 20-22**

| Compound | Structure                                                                           | HLB Number  | SMILES                                     |
|----------|-------------------------------------------------------------------------------------|-------------|--------------------------------------------|
| 1        | 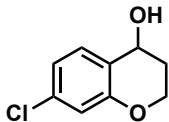   | HLB-0522184 | <chem>OC2CCOc1cc(Cl)ccc12</chem>           |
| 5        |    | HLB-0535152 | <chem>CC2(O)CCOc1cc(Cl)ccc12</chem>        |
| 6        |    | HLB-0535154 | <chem>CCC2(O)CCOc1cc(Cl)ccc12</chem>       |
| 7        |    | HLB-0535143 | <chem>OC3(C1CC1)CCOc2cc(Cl)ccc23</chem>    |
| 8        |   | HLB-0535139 | <chem>OC3(c1ccccc1)CCOc2cc(Cl)ccc23</chem> |
| 9        |  | HLB-0535153 | <chem>COC2CCOc1cc(Cl)ccc12</chem>          |
| 10       |  | HLB-0535140 | <chem>Cc1cccc2OCCC(O)c12</chem>            |
| 11       |  | HLB-0535141 | <chem>Cc2ccc1OCCC(O)c1c2</chem>            |
| 12       |  | HLB-0535142 | <chem>Cc1ccc2c(c1)OCCC2O</chem>            |
| 13       |  | HLB-0535144 | <chem>Cc1cccc2c1OCCC2O</chem>              |

| Compound | Structure | HLB Number  | SMILES                                        |
|----------|-----------|-------------|-----------------------------------------------|
| 14       |           | HLB-0535157 | <chem>Cc1cc(Cl)cc2OCCC(O)c12</chem>           |
| 15       |           | HLB-0535155 | <chem>Cc1cc(Cl)cc2OCCC(C)(O)c12</chem>        |
| 16       |           | HLB-0535156 | <chem>CCC2(O)CCOc1cc(Cl)cc(C)c12</chem>       |
| 17       |           | HLB-0535158 | <chem>Cc2cc(Cl)cc3OCCC(O)(C1CC1)c23</chem>    |
| 18       |           | HLB-0535159 | <chem>Cc2cc(Cl)cc3OCCC(O)(c1ccccc1)c23</chem> |
| 20       |           | HLB-0535160 | <chem>COc1cc(Cl)cc(C)c1C(C)(C)O</chem>        |
| 21       |           | HLB-0535161 | <chem>COc1cc(Cl)cc(C)c1C(C)(O)C2CC2</chem>    |
| 22       |           | HLB-0535162 | <chem>COc1cc(Cl)cc(C)c1C(C)(O)c2ccccc2</chem> |

HLB (Harki Lab) numbers are unique molecular identifiers for molecules reported by the Harki group and can be referenced in material transfer requests.

## Assay Procedures

### Fragment Library

The fragment library was purchased from Life Chemicals high-solubility fragment collection and consisted of 1056 fragments. The fragments were dissolved at 200 mM in DMSO- $d_6$  and dispensed into master plates. A portion of the 200 mM stocks was used to pool mixtures of 5 fragments at 40 mM in DMSO- $d_6$  (fragments were pooled by chemical compatibility).

### NIK Protein for Assays

Human NIK protein was purchased from GenScript at  $\geq 80\%$  purity (residues 336-686 with N-terminal 6xHis-tag and TEV cleavage site). The storage buffer for NIK protein consisted of 20 mM Tris (pH = 8.0), 300 mM NaCl, 40% glycerol, 0.25 mM TCEP. The 6xHis-tag was kept intact for all experiments. For CPMG NMR, the protein was directly diluted into buffer. For SPR, NIK was buffer exchanged into 40 mM  $\text{KH}_2\text{PO}_4/\text{K}_2\text{HPO}_4$  (pH = 8), 100 mM KCl, 10 mM  $\text{MgCl}_2$ , 0.01% Tween-20 using Amicon Ultra-0.5 centrifugal filter units (MilliporeSigma, 3 kDa filter). NIK concentration was measured on a NanoDrop 2000 spectrophotometer (Thermo Scientific). EZ-Link NHS-PEG4-Biotin (Thermo Scientific) was dissolved in  $\text{H}_2\text{O}$  and added to the NIK protein at a 1:1 ratio. The mixture was incubated overnight at 4°C. The mixture was buffer exchanged into 40 mM  $\text{KH}_2\text{PO}_4/\text{K}_2\text{HPO}_4$  (pH = 8.0), 100 mM KCl, 10 mM  $\text{MgCl}_2$ , 0.01% Tween-20 using Amicon Ultra-0.5 centrifugal filter units to remove the excess EZ-Link NHS-PEG4-Biotin reagent. The biotinylated NIK protein concentration was measured on a NanoDrop 2000 spectrophotometer and diluted into running buffer to be used for all SPR assays.

### CPMG NMR – General Parameters

One-dimensional  $^1\text{H}$ -NMR binding assays using standard CPMG pulse sequence with  $T_2$  filtering<sup>4</sup> were run at the Minnesota NMR Center on a 700-MHz Bruker Avance I spectrometer equipped with a SampleJet autosampler. Assays were performed to measure the binding of fragments to the catalytic domain of human NIK. Buffer conditions used were 50 mM  $\text{KH}_2\text{PO}_4/\text{K}_2\text{HPO}_4$  (pH = 8), 300 mM KCl, 10 mM  $\text{MgCl}_2$ , 10%  $\text{D}_2\text{O}$  in  $\text{H}_2\text{O}$ . All samples were made by diluting the fragments/pooled fragments (in DMSO- $d_6$ ) into buffer. The samples were run in 1.7 mm BioSpin NMR tubes (Bruker) at room temperature.

### CPMG NMR – Screening Assay

While following the general parameters described above, in these experiments AMP-PNP (MilliporeSigma, 10102547001) was added to saturate the NIK orthosteric binding site. The autosampler was cooled to 4°C during the duration of the experiments to ensure protein stability while samples were waiting

to be run. Two separate samples were made to record two spectra for each of the fragment mixtures. One sample contained five fragments at 100  $\mu\text{M}$  concentration in buffer. The other sample contained five fragments at 100  $\mu\text{M}$ , NIK protein at 10  $\mu\text{M}$ , and AMP-PNP at 1 mM in buffer. Fragments were considered to be hits if binding was observed (approximately 50% signal attenuation or greater).

### **CPMG NMR – Competition Assay**

While following the general parameters described above, in these experiments the fragments were run individually and three spectra were recorded for each fragment: 1) Fragment at 100  $\mu\text{M}$  in buffer, 2) Fragment at 100  $\mu\text{M}$  and NIK at 10  $\mu\text{M}$  in buffer, 3) Fragment at 100  $\mu\text{M}$ , NIK at 10  $\mu\text{M}$ , and AMP-PNP at 1 mM in buffer. Fragments were considered hits if binding was observed, but competition with AMP-PNP was not observed (approximately 50% signal attenuation or greater for both 2 and 3 and greater signal attenuation for 3 than 2).

### **SPR Screening Assay**

Surface plasmon resonance (SPR) was performed at the UMN Institute of Therapeutic Drug Discovery and Development (ITDD) High-Throughput Screening Laboratory. A Series S NeutrAvidin-coated sensor chip (Cytiva, 29407997) was docked into a Biacore S200 instrument. The running buffer consisted of 10 mM HEPES (pH = 7.4), 150 mM NaCl, 10 mM  $\text{MgCl}_2$ , 3 mM DTT, 0.5 mg/mL  $\gamma$ -globulins, 0.005% (v/v) Tween20, 5% DMSO (when testing small molecules). Biotinylated human NIK protein at 100  $\mu\text{g}/\text{mL}$  was injected over flow-cells 2 and 4 (flow-cells 1 and 3 were used for reference subtraction) with a contact time of 600 sec at a flow-rate of 5  $\mu\text{L}/\text{min}$ . Observed immobilization levels were 5000-8000 response units (RU). To block the remaining NeutrAvidin sites, 100  $\mu\text{M}$  solution of biocytin was injected over all flow-cells with a contact time of 300 sec at a flow-rate of 10  $\mu\text{L}/\text{min}$ . Compounds were run at a top concentration of 500  $\mu\text{M}$ . 2-fold serial dilutions were made from the top concentration to obtain 5-dose response series for screening and 7 or 9 dose-response series for confirming hits and testing analogues. 1 mM AMP-PNP was added to compound containing wells when determining affinities in the presence of AMP-PNP. The activity of the chip surface was monitored by including reference compound staurosporine (pan-kinase inhibitor) first and last in each run. The assay was stable for one day at room temperature.  $K_d$  values were determined using Biacore software with a steady-state fit. The mean  $\pm$  SEM was calculated using Microsoft Excel (version 16.76).

### **qNMR Solubility Assay**

Solubility assay was set up using a modification of a published protocol.<sup>5</sup> A sample of 1 mM of maleic acid and 5 mM of **5** was made in assay buffer consisting of 50 mM K<sub>2</sub>HPO<sub>4</sub> (pH = 7.4) in D<sub>2</sub>O with 5% DMSO-*d*<sub>6</sub>. A qNMR pulse sequence was run where D1 was set to 60 s with 256 scans using a 90° pulse. The NMR spectra was worked up in MestReNova (version 14.2.2). Integration of the peaks correlated with **5** were compared to the known concentration standard of maleic acid and the concentration of **5** in solution was determined.

### **NMR Aggregation Assay**

Aggregation assay was set up using a published protocol.<sup>6</sup> The data was worked up in MestReNova (version 14.2.2).

### **Resazurin Redox Assay**

Resazurin redox assay was set up using a published protocol.<sup>7</sup> The data was worked up in Microsoft Excel (version 16.76) and graphed in Prism (version 9.3.1).

## SPR Sensorgrams

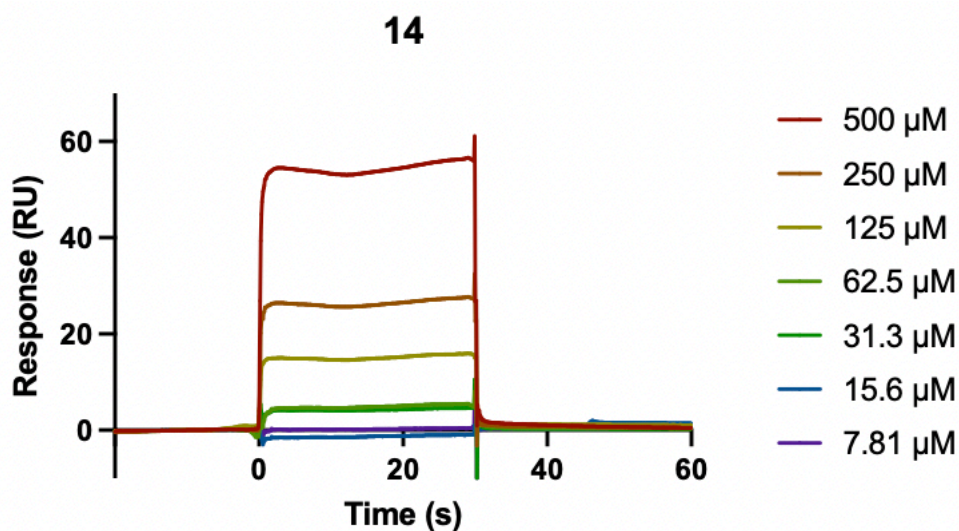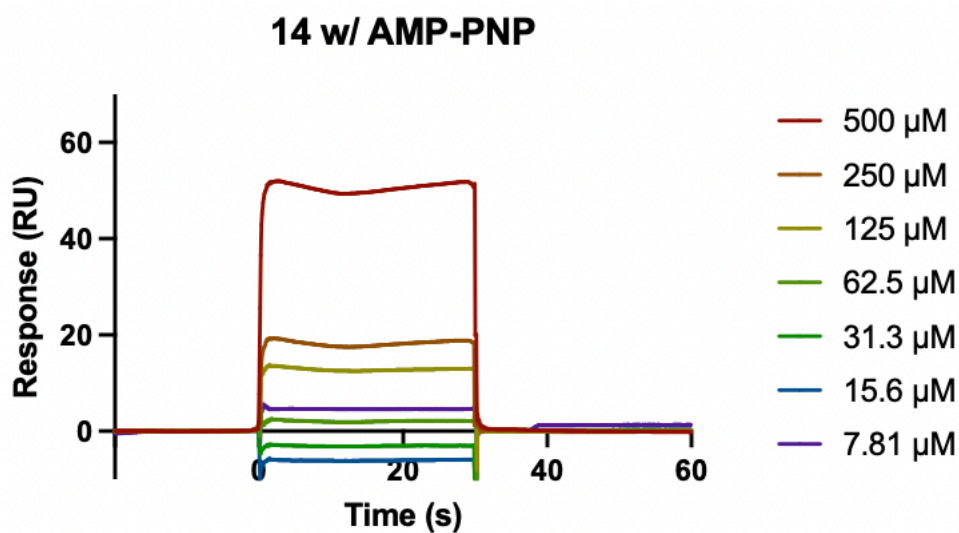

Representative sensorgrams of **14** with and without AMP-PNP (one replicate shown, but two replicates were generated). This sensorgram is representative of all compounds that did not generate a  $K_d$  of less than 1 mM.

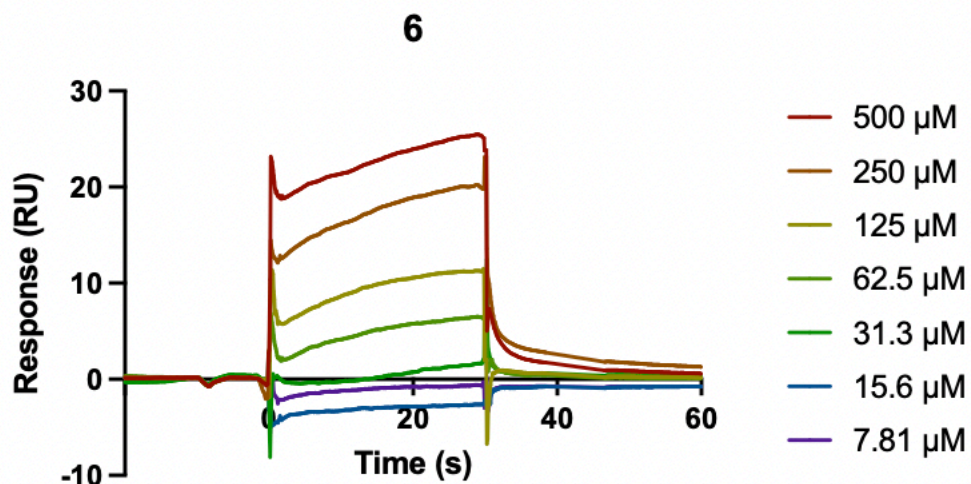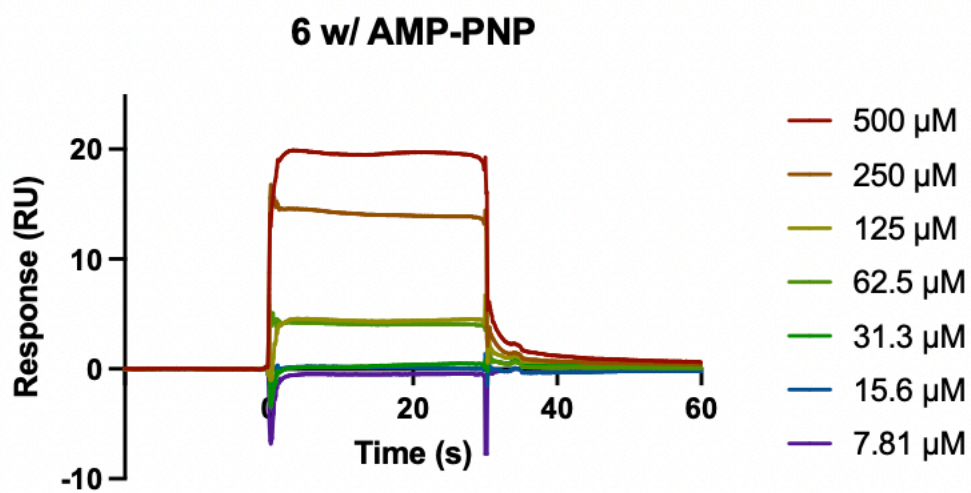

Representative sensorgrams of **6** with and without AMP-PNP (one replicate shown, but two replicates were generated).



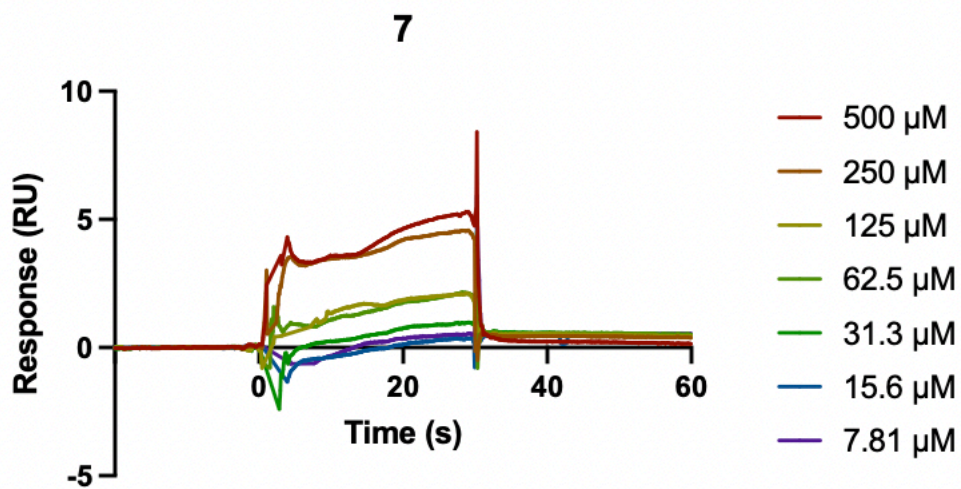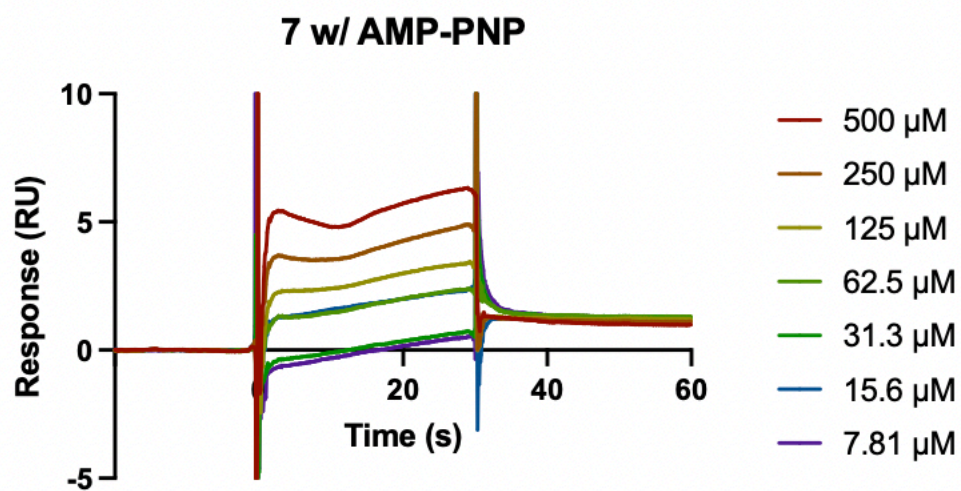

Representative sensorgrams of **7** with and without AMP-PNP (one replicate shown, but two replicates were generated).

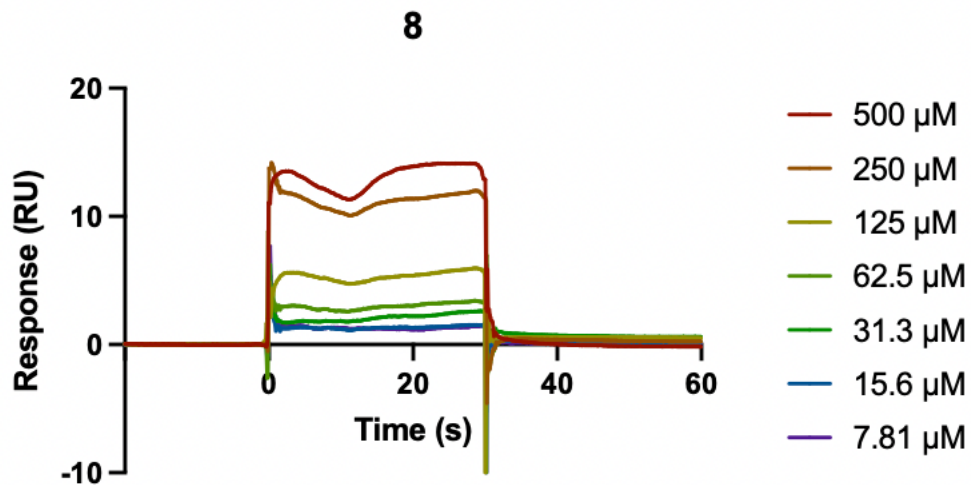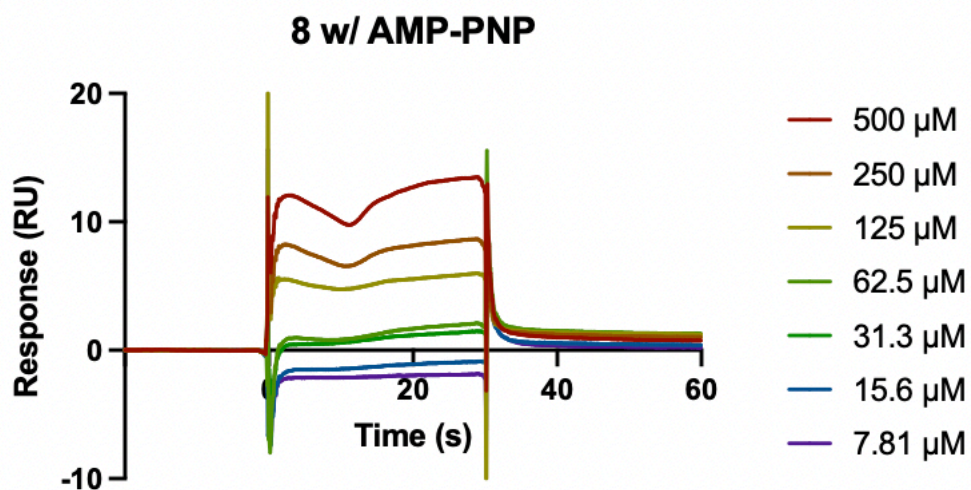

Representative sensorgrams of **8** with and without AMP-PNP (one replicate shown, but two replicates were generated).

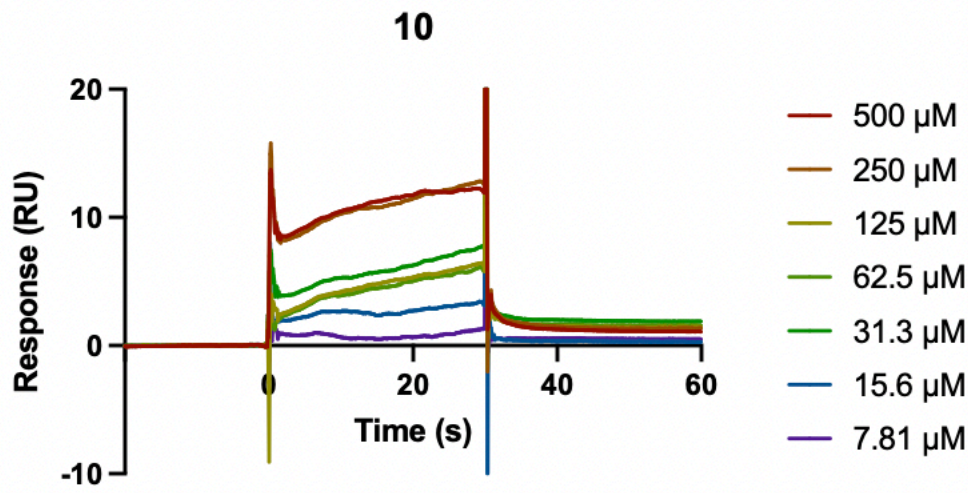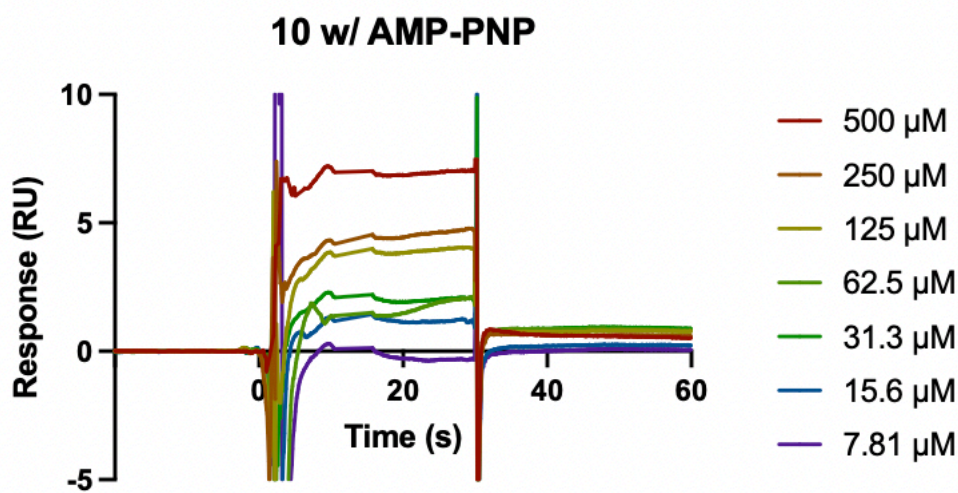

Representative sensorgrams of **10** with and without AMP-PNP (one replicate shown, but two replicates were generated).

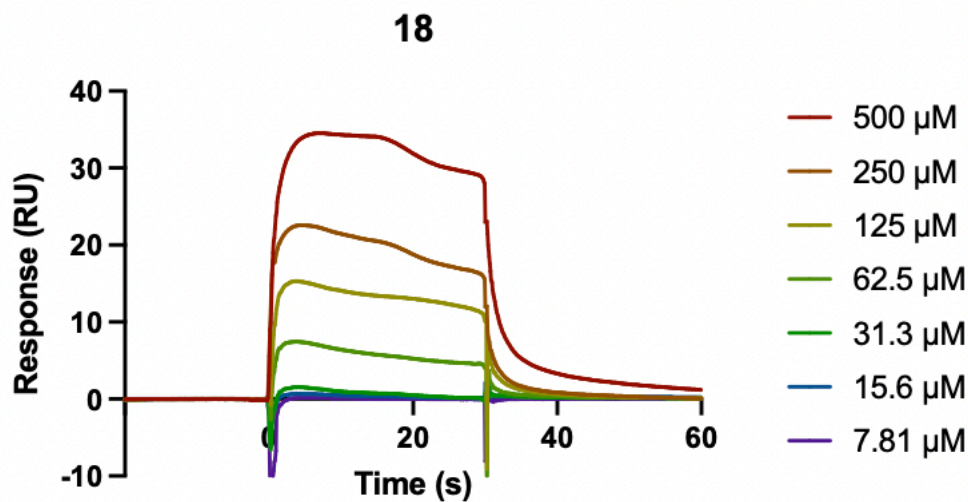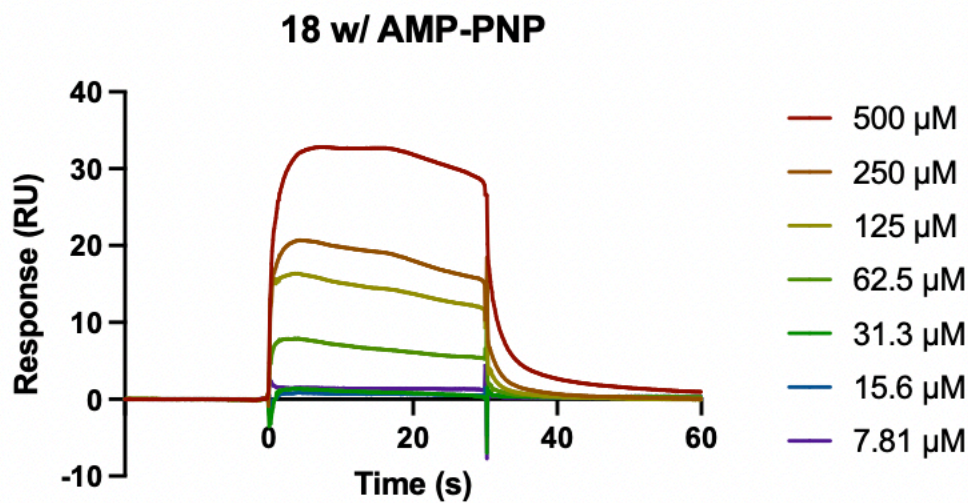

Representative sensorgrams of **18** with and without AMP-PNP (one replicate shown, but two replicates were generated).

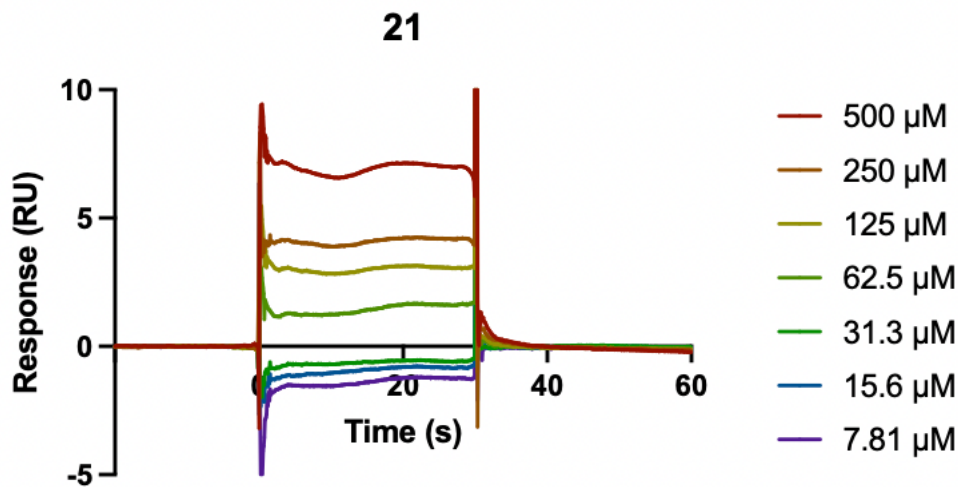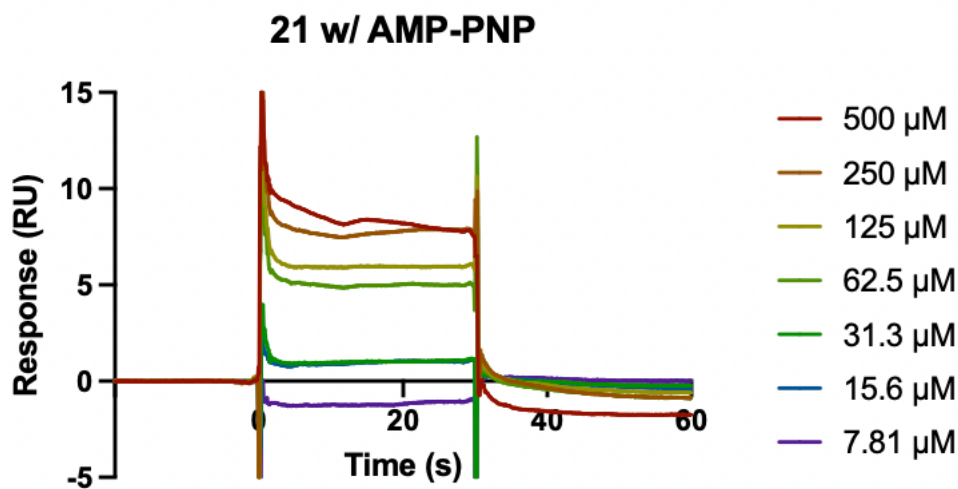

Representative sensorgrams of **21** with and without AMP-PNP (one replicate shown, but two replicates were generated).

## References

1. Buck, J. S.; Cutler, R. A.; Nachod, F. C.; Powles, R. G.; Rokoczy, R.; Slauson, T. J.; Tullar, B. F. Some Chlorinated 4-Indanols: Preparation and Proof of Structures. *J. Am. Chem. Soc.* **1957**, *79*, 3559.
2. Mahalingam, P.; Takroui, K.; Chen, T.; Sahoo, R.; Papadopoulos, E.; Chen, L.; Wagner, G.; Aktas, B. H.; Halperin, J. A.; Chorev, M. Synthesis of Rigidified eIF4E/eIF4G Inhibitor-1 (4EGI-1) Mimetic and Their in Vitro Characterization as Inhibitors of Protein-Protein Interaction. *J. Med. Chem.* **2014**, *57*, 5094.
3. Alexander, J. R.; Ott, A. A.; Liu, E.; Topczewski, J. J. Kinetic Resolution of Cyclic Secondary Azides, Using an Enantioselective Copper-Catalyzed Azide-Alkyne Cycloaddition. *Org. Lett.* **2019**, *21*, 4355.
4. Johnson, J. A.; Olson, N. M.; Tooker, M. J.; Bur, S. K.; Pomerantz, W. C.K. Combined Protein- and Ligand-Observed NMR Workflow to Screen Fragment Cocktails against Multiple Proteins: A Case Study Using Bromodomains. *Molecules* **2020**, *25*, 3949.
5. Bharti, S. K.; Roy, R. Quantitative  $^1\text{H}$  NMR spectroscopy. *TrAC, Trends Anal. Chem.* **2012**, *35*, 5.
6. LaPlante, S. R.; Carson, R.; Gillard, J.; Aubry, N.; Coulombe, R.; Bordeleau, S.; Bonneau, P.; Little, M.; O'Meara, J.; Beaulieu, P. L. Compound Aggregation in Drug Discovery: Implementing a Practical NMR Assay for Medicinal Chemists. *J. Med. Chem.* **2013**, *56*, 5142.
7. Lor, L. A.; Schneck, J.; McNulty, D. E.; Diaz, E.; Brandt, M.; Thrall, S. H.; Schwartz, B. A Simple Assay for Detection of Small-Molecule Redox Activity. *J. Biomol. Screen.* **2007**, *12*, 881.
